# Supplementary material for: A Higher-Order Generalized Singular Value Decomposition for Comparison of Global mRNA Expression from Multiple Organisms
Source: PubMed Central journal article supplement (PMC3245232; doi:10.1371/journal.pone.0028072), 2011-12-22

```
(* © Sri Priya Ponnappalli and Orly Alter 2011 *)
```

```
(* All Rights Reserved *)
```

```
<< LinearAlgebra`MatrixManipulation`;  
<< NumericalMath`TrigFit`;  
<< Graphics`Graphics`;  
<< Graphics`Colors`;  
<< Graphics`Arrow`;  
Off[General::"spell"];  
Off[General::"spell1"];
```

```
(* Estimate Missing S. pombe, S. cerevisiae and Human Cell Cycle Data Using SVD *)
```

```
(* Estimate Missing S. pombe Cell Cycle Data Using SVD *)
```

```
(* Read S. pombe Data *)
```

```
stream = "Desktop/HO_GSVD/Data/S_pombe.txt";  
matrix = Import[stream, "Table"];  
{genes, arrays} = Dimensions[matrix] - {1, 4}  
Clear[stream];
```

```
{3167, 17}
```

```
genenames = TakeRows [  
  TakeColumns[matrix, {1, 4}],  
  {2, genes + 1}];  
arraynames = TakeColumns [  
  TakeRows[matrix, {1, 1}],  
  {5, arrays + 4}];  
matrix = TakeColumns [  
  TakeRows[matrix, {2, genes + 1}],  
  {5, arrays + 4}];  
matrix = ToExpression[matrix];
```

```
(* Count Null Data *)
```

```
counter = Table[Dimensions[Position[matrix[[a]], Null]][[1]], {a, 1, genes}];
```

```
(* Locate Gene Position of Null Data *)
```

```
Clear[positions];  
positions = Table[0, {a, 1, arrays + 1}];  
Do [  
  positions[[a]] = Flatten [  
    Position[Flatten[counter], a - 1]],  
  {a, 1, arrays + 1}];  
numbers = Flatten [  
  Table [  
    Dimensions[positions[[a]]],  
    {a, 1, Round[arrays * 0.25]}];
```

```
(* Create Display Of Gene Position Of Null Data *)
```

```
framex = Table[{a, a - 1}, {a, 1, Round[arrays * 0.25]}];  
framey = {500, 1000, 1500, 2000};  
labelx = ColumnForm[{"Number of Arrays"}, Center];  
labely = ColumnForm[{"Number of Genes"}, Center];  
g = BarChart[numbers,  
  Frame -> True,  
  Axes -> False,  
  FrameLabel -> {labelx, labely, None, None},  
  FrameTicks -> {framex, framey, None, None},  
  GridLines -> {None, None},  
  PlotRange -> {{0.5, Round[arrays * 0.25] + 0.5}, {0, 2000}},  
  DisplayFunction -> Identity];  
g = FullGraphics[g];  
g[[1, 2]] = g[[1, 2]] /.  
  Text[labely, {b_, c_}, {1., 0.}] ->  
  Text[labely, {b - 0.75, c}, {0, 0}, {0, 1}];  
g[[1, 2]] = g[[1, 2]] /.  
  Text[labelx, {b_, c_}, {0., 1.}] ->  
  Text[labelx, {b, c - 400}, {0, 1}, {1, 0}];
```

```
(* Display Gene Position Of Null Data *)
```

```
Show[g, PlotRange -> All];
```

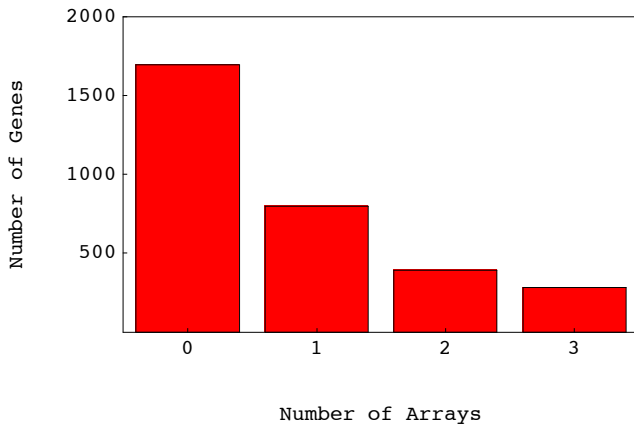

```
(* Select Genes by Number of Missing Data Points *)
```

```
matrix = AppendRows[Table[{counter[[a]]}, {a, 1, genes}], genenames, matrix];  
matrix = Sort[matrix, OrderedQ[{{#1, #2}} &];  
fullgenenames = TakeColumns[  
  TakeRows[matrix, {1, numbers[[1]]}],  
  {2, 5}];  
fullmatrix = TakeColumns[  
  TakeRows[matrix, {1, numbers[[1]]}],  
  {6, arrays + 5}];  
missinggenenames1 = TakeColumns[  
  TakeRows[matrix, {numbers[[1]] + 1, numbers[[1]] + numbers[[2]]}],  
  {2, 5}];  
missingmatrix1 = TakeColumns[  
  TakeRows[matrix, {numbers[[1]] + 1, numbers[[1]] + numbers[[2]]}],  
  {6, arrays + 5}];  
missinggenenames2 = TakeColumns[  
  TakeRows[matrix,  
    {numbers[[1]] + numbers[[2]] + 1,  
    numbers[[1]] + numbers[[2]] + numbers[[3]]}],  
  {2, 5}];  
missingmatrix2 = TakeColumns[  
  TakeRows[matrix,  
    {numbers[[1]] + numbers[[2]] + 1,  
    numbers[[1]] + numbers[[2]] + numbers[[3]]}],  
  {6, arrays + 5}];
```

```

missinggenenames3 = TakeColumns[
  TakeRows[matrix,
    {numbers[[1]] + numbers[[2]] + numbers[[3]] + 1,
     numbers[[1]] + numbers[[2]] + numbers[[3]] + numbers[[4]]}],
  {2, 5}];
missingmatrix3 = TakeColumns[
  TakeRows[matrix,
    {numbers[[1]] + numbers[[2]] + numbers[[3]] + 1,
     numbers[[1]] + numbers[[2]] + numbers[[3]] + numbers[[4]]}],
  {6, arrays + 5}];

(* Locate Array Position of Null Data *)

locator1 = Table[0, {numbers[[2]]}];
Do[
  locator1[[a]] = locator1[[a]] + Flatten[Position[missingmatrix1[[a]], Null]],
  {a, 1, numbers[[2]]}];
locator2 = Table[0, {numbers[[3]]}];
Do[
  locator2[[a]] = locator2[[a]] + Flatten[Position[missingmatrix2[[a]], Null]],
  {a, 1, numbers[[3]]}];
locator3 = Table[0, {numbers[[4]]}];
Do[
  locator3[[a]] = locator3[[a]] + Flatten[Position[missingmatrix3[[a]], Null]],
  {a, 1, numbers[[4]]}];

(* Sort Raw Data According to the Position of Missing Data Points for Each Gene *)

missingmatrix1 = AppendRows[locator1, missinggenenames1, missingmatrix1];
missingmatrix1 = Sort[missingmatrix1, OrderedQ[{{#1, #2}} &];
locator1 = TakeColumns[missingmatrix1, {1, 1}];
missinggenenames1 = TakeColumns[missingmatrix1, {2, 5}];
missingmatrix1 = TakeColumns[missingmatrix1, {6, arrays + 5}];
missingmatrix2 = AppendRows[locator2, missinggenenames2, missingmatrix2];
missingmatrix2 = Sort[missingmatrix2, OrderedQ[{{#1, #2}} &];
locator2 = TakeColumns[missingmatrix2, {1, 2}];
missinggenenames2 = TakeColumns[missingmatrix2, {3, 6}];
missingmatrix2 = TakeColumns[missingmatrix2, {7, arrays + 6}];
missingmatrix3 = AppendRows[locator3, missinggenenames3, missingmatrix3];
missingmatrix3 = Sort[missingmatrix3, OrderedQ[{{#1, #2}} &];
locator3 = TakeColumns[missingmatrix3, {1, 3}];
missinggenenames3 = TakeColumns[missingmatrix3, {4, 7}];
missingmatrix3 = TakeColumns[missingmatrix3, {8, arrays + 7}];

(* Examine Subset of Genes with Full Data *)

(* Calculate SVD *)

{eigenarrays, eigenexpressions, eigengenest} = SingularValues[fullmatrix];
eigenarrays = Transpose[eigenarrays];
fractions = eigenexpressions^2 / Sum[eigenexpressions[[a]]^2, {a, 1, arrays}];
entropy = -N[Sum[fractions[[a]] * Log[fractions[[a]]], {a, 1, arrays}] / Log[arrays];
entropy = N[Round[100 * entropy] / 100]

0.09

(* Create Fractions Bar Charts Displays *)

fractions[[2]]

0.0170902

```

```

limit = 0.018;
Clear[gridx, framex, framey];
gridx = Table[a, {a, 0, limit, N[limit/3]}];
framex = gridx;
framex = Table[{gridx[[a]], framex[[a]]}, {a, 1, 4}];
gridx = Table[{gridx[[a]], RGBColor[0, 0, 0]}, {a, 1, 4}];
framey = Table[{a + 1, arrays - a - 6}, {a, 0, 12 - 3}];
table = Table[fractions[[arrays - a]], {a, 6, arrays - 2}];
g = BarChart[table,
  BarOrientation -> Horizontal,
  PlotRange -> {{0, limit * 1.0001}, {0.5, 12 - 2 + 0.5}},
  AspectRatio -> 1,
  Axes -> False,
  Frame -> True,
  FrameTicks -> {None, framey, framex, None},
  FrameLabel -> {None, None, None, None},
  GridLines -> {gridx, None},
  DisplayFunction -> Identity];
g = FullGraphics[g];
g[[1, 2]] = g[[1, 2]] /.
  Text[a_, {b_, c_}, {0., -1.}] ->
  Text[a, {b, c}, {0, -1}, {0, 1}];
g1 = Show[g,
  AspectRatio -> 1.25,
  PlotRange -> All,
  DisplayFunction -> Identity];

gridx = Table[a, {a, 0, 1, 0.2}];
framex = gridx;
framex = Table[{gridx[[a]], framex[[a]]}, {a, 1, 6}];
framex[[6]] = {1, "1"};
gridx = Table[{gridx[[a]], RGBColor[0, 0, 0]}, {a, 1, 6}];
framey = Table[{a + 1, arrays - a}, {a, 0, arrays - 1}];
labelx = ColumnForm[
  {"(b) Eigenexpression Fraction", StringJoin["d1 = ", ToString[entropy]], " "},
  Center];
g = BarChart[
  Table[fractions[[arrays - a]], {a, 0, arrays - 1}],
  BarOrientation -> Horizontal,
  PlotRange -> {{0, 1.0001}, {0.5, arrays + 0.5}},
  AspectRatio -> 1,
  Axes -> False,
  Frame -> True,
  FrameTicks -> {None, framey, framex, None},
  FrameLabel -> {None, None, labelx, None},
  GridLines -> {gridx, None},
  DisplayFunction -> Identity];
g = FullGraphics[g];
g[[1, 2]] = g[[1, 2]] /.
  Text[labelx, {b_, c_}, {0., -1.}] ->
  Text[labelx, {b, c + 3}, {0, -1}, {1, 0}];
g[[1, 2]] = g[[1, 2]] /.
  Text[a_, {b_, c_}, {0., -1.}] ->
  Text[a, {b, c}, {0, -1}, {0, 1}];
g2 = Show[{g,
  Graphics[{RGBColor[1, 1, 0.8], Rectangle[{0.1, 0.6}, {0.98, 15.5}]}],
  Graphics[{Rectangle[{0.1, 0.6}, {0.98, 15.5}, g1}]}],
  AspectRatio -> 1.35,
  PlotRange -> All,
  DisplayFunction -> Identity];

```

(\* Create Eigengenes 2D Red & Green Raster Display \*)

```
contrast = 3.5;
displaying = Table[
  If[contrast * eigengenes[[i, j]] > 0,
    If[contrast * eigengenes[[i, j]] < 1, {contrast * eigengenes[[i, j]], 0}, {1, 0}],
    If[contrast * eigengenes[[i, j]] > -1, {0, -contrast * eigengenes[[i, j]]}, {0, 1}]],
  {i, 1, arrays}, {j, 1, arrays}];
framex = Table[{a - 0.5, arraynames[[1, a]]}, {a, 1, arrays}];
framey = Table[{a + 1 - 0.5, arrays - a}, {a, 0, arrays - 1}];
labely = "Eigengenes";
labelx = ColumnForm[{"(a) Arrays", " ", " "}, Center];
```

```
g = Show[
  Graphics[
    RasterArray[
      Table[
        RGBColor[displaying[[i, j, 1]], displaying[[i, j, 2]], 0],
        {i, arrays, 1, -1}, {j, 1, arrays}]]],
  AspectRatio -> 1,
  Frame -> True,
  FrameTicks -> {None, framey, framex, None},
  FrameLabel -> {None, labely, labelx, None},
  DisplayFunction -> Identity];
g = FullGraphics[g];
g[[1, 2]] = g[[1, 2]] /.
  Text[labely, {b_, c_}, {1., 0.}] ->
  Text[labely, {b - 3, c}, {0, 0}, {0, 1}];
g[[1, 2]] = g[[1, 2]] /.
  Text[labelx, {b_, c_}, {0., -1.}] ->
  Text[labelx, {b, c + 3}, {0, -1}, {1, 0}];
g[[1, 2]] = g[[1, 2]] /.
  Text[a_, {b_, c_}, {0., -1.}] ->
  Text[a, {b, c}, {0, -1}, {0, 1}];
g1 = Show[g,
  AspectRatio -> 1.05,
  PlotRange -> All,
  DisplayFunction -> Identity];
```

(\* Create Selected Eigengenes Graph Display \*)

```
p = Table[0, {5}];
color = {RGBColor[1, 0, 0], RGBColor[0, 0, 1], RGBColor[0, 0.5, 0],
  RGBColor[1, 0.5, 0], RGBColor[0.75, 0, 1]};
xlabels = {"(c) Arrays", " ", " ", "(d) Arrays", " "};
ylabels = {" ", "Expression Level", {" ", " "}, {" ", " "}, {" ", " "}, {" ", " "}};
framex = Table[{a - 1, arraynames[[1, a]]}, {a, 1, arrays}];
framey = {-1, -0.5, 0, 0.5, 1};
flag = 0;
```

```

Do[{
  labelx = ColumnForm[{xlabels[[n]]}, Center],
  labely = ColumnForm[{ylabels[[n]]}, Center],
  coordinates = Table[{a - 1, eigengenes[[n, a]]}, {a, 1, arrays}],
  points = Table[Point[coordinates[[a]]], {a, 1, arrays}],
  line = Line[coordinates],
  If[n == 4, flag = 0],
  g = Show[{
    Graphics[{color[[n]], PointSize[0.022], points}],
    Graphics[{color[[n]], line}],
    If[flag == 0,
      {FrameLabel -> {None, labely, labelx, None},
       FrameTicks -> {None, framey, framex, None}},
      {FrameLabel -> {None, labely, labelx, None},
       FrameTicks -> {None, None, None, None}}],
    Frame -> True,
    GridLines -> {None, {{0, RGBColor[0, 0, 0]}}},
    PlotRange -> {-1.05, 1.05},
    DisplayFunction -> Identity],
  g = FullGraphics[g],
  g[[1, 2]] = g[[1, 2]] /.
    Text[labely, {b_, c_}, {1., 0.}] ->
    Text[labely, {b - 5.4, c}, {0, 0}, {0, 1}],
  g[[1, 2]] = g[[1, 2]] /.
    Text[labelx, {b_, c_}, {0., -1.}] ->
    Text[labelx, {b, c + 0.625}, {0, -1}, {1, 0}],
  g[[1, 2]] = g[[1, 2]] /.
    Text[a_, {b_, c_}, {0., -1.}] ->
    Text[a, {b, c}, {0, -1}, {0, 1}],
  flag = flag + 1,
  p[[n]] = Show[g,
    AspectRatio -> 1.05,
    PlotRange -> All,
    DisplayFunction -> Identity]],
{n, 1, 5}]

```

(\* Display Selected Eigengenes \*)

```

g3 = Show[{p[[1]], p[[2]], p[[3]]}, DisplayFunction -> Identity];
g4 = Show[{p[[4]], p[[5]]}, DisplayFunction -> Identity];

```

(\* Display Eigengenes, Fractions and Selected Eigengenes \*)

```

Show[GraphicsArray[{g1, g2, g3, g4}],
  GraphicsSpacing -> -0.15];

```

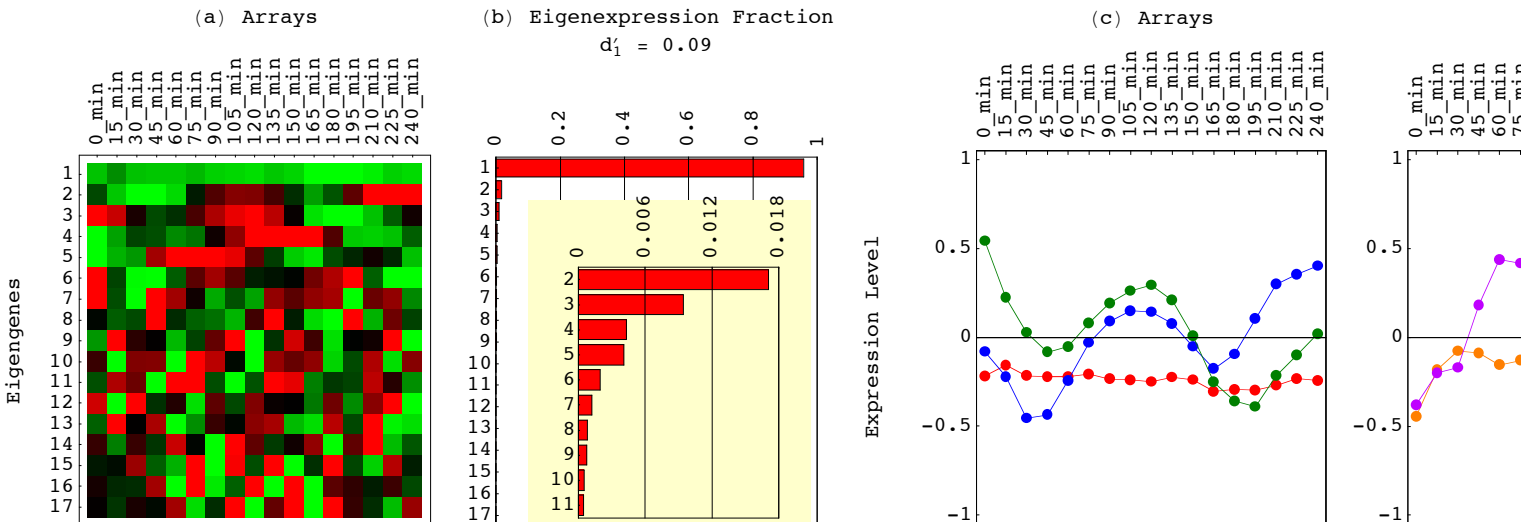

(\* Choose Subset of Eigengenes for Estimation \*)

```
eigengenes = TakeRows[eigengenes, {1, 5}];
```

(\* Estimate Missing Data \*)

```
Do[
  missingmatrix1[[a, locator1[[a, 1]]]] =
  N[Round[Flatten[Dot[Dot[
    Transpose[Drop[
      Transpose[{missingmatrix1[[a]]}],
      {locator1[[a, 1]]}],
    PseudoInverse[Transpose[Drop[
      Transpose[eigengenes],
      {locator1[[a, 1]]}],
    eigengenes]][[locator1[[a, 1]]] * 100] / 100],
  {a, 1, numbers[[2]]}]

Do[Do[
  missingmatrix2[[a, locator2[[a, b]]]] =
  N[Round[Flatten[Dot[Dot[
    Transpose[Drop[Drop[
      Transpose[{missingmatrix2[[a]]}],
      {locator2[[a, 2]]}, {locator2[[a, 1]]}],
    PseudoInverse[Transpose[Drop[Drop[
      Transpose[eigengenes],
      {locator2[[a, 2]]}, {locator2[[a, 1]]}],
    eigengenes]][[locator2[[a, b]]] * 100] / 100],
  {b, 1, 2}],
  {a, 1, numbers[[3]]}]

Do[Do[
  missingmatrix3[[a, locator3[[a, b]]]] =
  N[Round[Flatten[Dot[Dot[
    Transpose[Drop[Drop[Drop[
      Transpose[{missingmatrix3[[a]]}],
      {locator3[[a, 3]]}, {locator3[[a, 2]]}, {locator3[[a, 1]]}],
    PseudoInverse[Transpose[Drop[Drop[Drop[
      Transpose[eigengenes],
      {locator3[[a, 3]]}, {locator3[[a, 2]]}, {locator3[[a, 1]]}],
    eigengenes]][[locator3[[a, b]]] * 100] / 100],
  {b, 1, 3}],
  {a, 1, numbers[[4]]}]

genenames = AppendColumns[
  fullgenenames,
  missinggenenames1,
  missinggenenames2,
  missinggenenames3];
matrix = AppendColumns[
  fullmatrix,
  missingmatrix1,
  missingmatrix2,
  missingmatrix3];
{genes, arrays} = Dimensions[matrix];
matrix1 = matrix;
genenames1 = genenames;
arraynames1 = arraynames;
{genes1, arrays1} = Dimensions[matrix1]

{3167, 17}
```

```
(* Examine S. pombe Data After Missing Data Estimation *)
```

```
(* Calculate SVD *)
```

```
{eigenarrays, eigenexpressions, eigengenes} = SingularValues[matrix];  
eigenarrays = Transpose[eigenarrays];  
fractions = eigenexpressions^2 / Sum[eigenexpressions[[a]]^2, {a, 1, arrays}];  
entropy = -N[Sum[fractions[[a]] * Log[fractions[[a]]], {a, 1, arrays}] / Log[arrays];  
entropy = N[Round[100 * entropy] / 100]
```

```
0.08
```

```
(* Create Fractions Bar Charts Displays *)
```

```
fractions[[2]]
```

```
0.015115
```

```
limit = 0.018;  
Clear[gridx, framex, framey];  
gridx = Table[a, {a, 0, limit, N[limit/3]}];  
framex = gridx;  
framey = Table[{gridx[[a]], framex[[a]]}, {a, 1, 4};  
gridx = Table[{gridx[[a]], RGBColor[0, 0, 0]}, {a, 1, 4};  
framey = Table[{a + 1, arrays - a - 6}, {a, 0, 12 - 3};  
table = Table[fractions[[arrays - a]], {a, 6, arrays - 2};  
g = BarChart[table,  
  BarOrientation -> Horizontal,  
  PlotRange -> {{0, limit * 1.0001}, {0.5, 12 - 2 + 0.5}},  
  AspectRatio -> 1,  
  Axes -> False,  
  Frame -> True,  
  FrameTicks -> {None, framey, framex, None},  
  FrameLabel -> {None, None, None, None},  
  GridLines -> {gridx, None},  
  DisplayFunction -> Identity];  
g = FullGraphics[g];  
g[[1, 2]] = g[[1, 2]] /.  
  Text[a_, {b_, c_}, {0., -1.}] ->  
  Text[a, {b, c}, {0, -1}, {0, 1}];  
g1 = Show[g,  
  AspectRatio -> 1.25,  
  PlotRange -> All,  
  DisplayFunction -> Identity];  
  
gridx = Table[a, {a, 0, 1, 0.2}];  
framex = gridx;  
framey = Table[{gridx[[a]], framex[[a]]}, {a, 1, 6};  
framey[[6]] = {1, "1"};  
gridx = Table[{gridx[[a]], RGBColor[0, 0, 0]}, {a, 1, 6};  
framey = Table[{a + 1, arrays - a}, {a, 0, arrays - 1};  
labelx = ColumnForm[  
  {"(b) Eigenexpression Fraction", StringJoin["d1 = ", ToString[entropy], " "],  
  Center];  
g = BarChart[  
  Table[fractions[[arrays - a]], {a, 0, arrays - 1},  
  BarOrientation -> Horizontal,  
  PlotRange -> {{0, 1.0001}, {0.5, arrays + 0.5}},  
  AspectRatio -> 1,  
  Axes -> False,  
  Frame -> True,  
  FrameTicks -> {None, framey, framex, None},  
  FrameLabel -> {None, None, labelx, None},  
  GridLines -> {gridx, None},  
  DisplayFunction -> Identity];
```



```

g = FullGraphics[g];
g[[1, 2]] = g[[1, 2]] /.
  Text[labelx, {b_, c_}, {0., -1.}] ->
  Text[labelx, {b, c + 3}, {0, -1}, {1, 0}];
g[[1, 2]] = g[[1, 2]] /.
  Text[a_, {b_, c_}, {0., -1.}] ->
  Text[a, {b, c}, {0, -1}, {0, 1}];
g2 = Show[g,
  Graphics[{RGBColor[1, 1, 0.8], Rectangle[{0.1, 0.6}, {0.98, 15.5}]}],
  Graphics[{Rectangle[{0.1, 0.6}, {0.98, 15.5}, g1]}],
  AspectRatio -> 1.35,
  PlotRange -> All,
  DisplayFunction -> Identity];

```

(\* Create Eigengenes 2 D Red & Green Raster Display \*)

```

contrast = 3.5;
displaying = Table[
  If[contrast * eigengenes[[i, j]] > 0,
    If[contrast * eigengenes[[i, j]] < 1, {contrast * eigengenes[[i, j]], 0}, {1, 0}],
    If[contrast * eigengenes[[i, j]] > -1, {0, -contrast * eigengenes[[i, j]]}, {0, 1}]],
  {i, 1, arrays}, {j, 1, arrays}];
framex = Table[{a - 0.5, arraynames[[1, a]]}, {a, 1, arrays}];
framey = Table[{a + 1 - 0.5, arrays - a}, {a, 0, arrays - 1}];
labely = "Eigengenes";
labelx = ColumnForm[{"(a) Arrays", " ", " "}, Center];

```

```

g = Show[
  Graphics[
    RasterArray[
      Table[
        RGBColor[displaying[[i, j, 1]], displaying[[i, j, 2]], 0],
        {i, arrays, 1, -1}, {j, 1, arrays}]]],
  AspectRatio -> 1,
  Frame -> True,
  FrameTicks -> {None, framey, framex, None},
  FrameLabel -> {None, labely, labelx, None},
  DisplayFunction -> Identity];

```

```

g = FullGraphics[g];
g[[1, 2]] = g[[1, 2]] /.
  Text[labely, {b_, c_}, {1., 0.}] ->
  Text[labely, {b - 3, c}, {0, 0}, {0, 1}];
g[[1, 2]] = g[[1, 2]] /.
  Text[labelx, {b_, c_}, {0., -1.}] ->
  Text[labelx, {b, c + 3}, {0, -1}, {1, 0}];
g[[1, 2]] = g[[1, 2]] /.
  Text[a_, {b_, c_}, {0., -1.}] ->
  Text[a, {b, c}, {0, -1}, {0, 1}];
g1 = Show[g,
  AspectRatio -> 1.05,
  PlotRange -> All,
  DisplayFunction -> Identity];

```

(\* Create Selected Eigengenes Graph Display \*)

```

p = Table[0, {5}];
color = {RGBColor[1, 0, 0], RGBColor[0, 0, 1], RGBColor[0, 0.5, 0],
  RGBColor[1, 0.5, 0], RGBColor[0.75, 0, 1]};
xlabel = {"(c) Arrays", "", "", "(d) Arrays", ""};
ylabel = {"", "Expression Level", {"", ""}, {"", ""}, {"", ""}, {"", ""}};
framex = Table[{a - 1, arraynames[[1, a]]}, {a, 1, arrays}];
framey = {-1, -0.5, 0, 0.5, 1};
flag = 0;

```

```

Do[{
  labelx = ColumnForm[{xlabels[[n]]}, Center],
  labely = ColumnForm[{ylabels[[n]]}, Center],
  coordinates = Table[{a - 1, eigengenes[[n, a]]}, {a, 1, arrays}],
  points = Table[Point[coordinates[[a]]], {a, 1, arrays}],
  line = Line[coordinates],
  If[n == 4, flag = 0],
  g = Show[{
    Graphics[{color[[n]], PointSize[0.022], points}],
    Graphics[{color[[n]], line}],
    If[flag == 0,
      {FrameLabel -> {None, labely, labelx, None},
       FrameTicks -> {None, framey, framex, None}},
      {FrameLabel -> {None, labely, labelx, None},
       FrameTicks -> {None, None, None, None}}],
    Frame -> True,
    GridLines -> {None, {{0, RGBColor[0, 0, 0]}}},
    PlotRange -> {-1.05, 1.05},
    DisplayFunction -> Identity],
  g = FullGraphics[g],
  g[[1, 2]] = g[[1, 2]] /.
    Text[labely, {b_, c_}, {1., 0.}] ->
    Text[labely, {b - 5.4, c}, {0, 0}, {0, 1}],
  g[[1, 2]] = g[[1, 2]] /.
    Text[labelx, {b_, c_}, {0., -1.}] ->
    Text[labelx, {b, c + 0.625}, {0, -1}, {1, 0}],
  g[[1, 2]] = g[[1, 2]] /.
    Text[a_, {b_, c_}, {0., -1.}] ->
    Text[a, {b, c}, {0, -1}, {0, 1}],
  flag = flag + 1,
  p[[n]] = Show[g,
    AspectRatio -> 1.05,
    PlotRange -> All,
    DisplayFunction -> Identity]],
{n, 1, 5}]

```

(\* Display Selected Eigengenes \*)

```

g3 = Show[{p[[1]], p[[2]], p[[3]]}, DisplayFunction -> Identity];
g4 = Show[{p[[4]], p[[5]]}, DisplayFunction -> Identity];

```

(\* Display Eigengenes, Fractions and Selected Eigengenes \*)

```

Show[GraphicsArray[{g1, g2, g3, g4}],
  GraphicsSpacing -> -0.15];

```

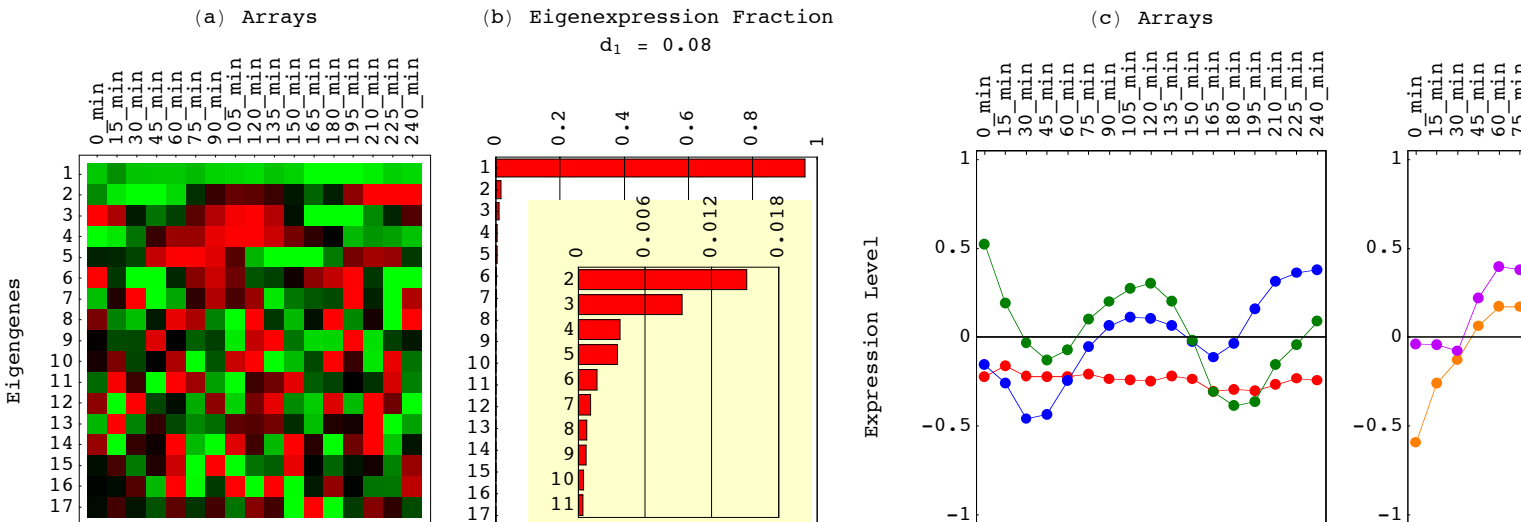

**(\* Estimate S. cerevisiae Missing Cell Cycle Data Using SVD \*)**

**(\* Read S. cerevisiae Data \*)**

```
stream = "Desktop/HO_GSVD/Data/S_cerevisiae.txt";
matrix = Import[stream, "Table"];
{genes, arrays} = Dimensions[matrix] - {1, 3}
Clear[stream];
```

```
{4772, 17}
```

```
genenames = TakeRows[
  TakeColumns[matrix, {1, 3}],
  {2, genes + 1}];
arraynames = TakeColumns[
  TakeRows[matrix, {1, 1}],
  {4, arrays + 3}];
matrix = TakeColumns[
  TakeRows[matrix, {2, genes + 1}],
  {4, arrays + 3}];
matrix = ToExpression[matrix];
```

**(\* Count Null Data \*)**

```
counter = Table[Dimensions[Position[matrix[[a]], Null]][[1]], {a, 1, genes}];
```

**(\* Locate Gene Position of Null Data \*)**

```
Clear[positions];
positions = Table[0, {a, 1, arrays + 1}];
Do[
  positions[[a]] = Flatten[
    Position[Flatten[counter], a - 1],
    {a, 1, arrays + 1}];
numbers = Flatten[
  Table[
    Dimensions[positions[[a]]],
    {a, 1, Round[arrays * 0.25]}];
```

**(\* Create Display Of Gene Position Of Null Data \*)**

```
framex = Table[{a, a - 1}, {a, 1, Round[arrays * 0.25]}];
framey = {500, 1000, 1500, 2000, 2500, 3000};
labelx = ColumnForm[{"Number of Arrays"}, Center];
labely = ColumnForm[{"Number of Genes"}, Center];
g = BarChart[numbers,
  Frame -> True,
  Axes -> False,
  FrameLabel -> {labelx, labely, None, None},
  FrameTicks -> {framex, framey, None, None},
  GridLines -> {None, None},
  PlotRange -> {{0.5, Round[arrays * 0.25] + 0.5}, {0, 3000}},
  DisplayFunction -> Identity];
g = FullGraphics[g];
g[[1, 2]] = g[[1, 2]] /.
  Text[labely, {b_, c_}, {1., 0.}] ->
  Text[labely, {b - 0.75, c}, {0, 0}, {0, 1}];
g[[1, 2]] = g[[1, 2]] /.
  Text[labelx, {b_, c_}, {0., 1.}] ->
  Text[labelx, {b, c - 400}, {0, 1}, {1, 0}];
```

(\* Display Gene Position Of Null Data \*)

```
Show[g, PlotRange -> All];
```

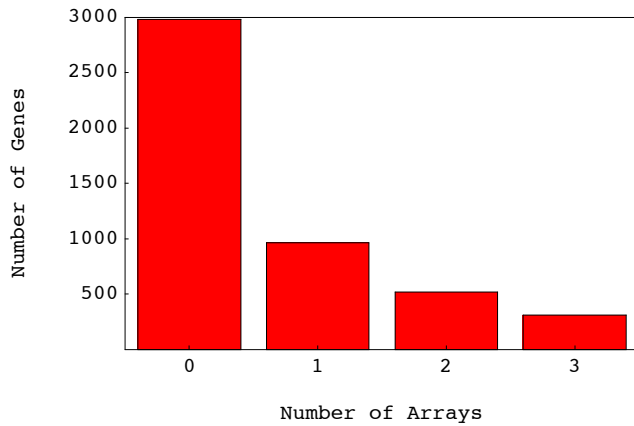

(\* Select Genes by Number of Missing Data Points \*)

```
matrix = AppendRows[Table[{counter[[a]]}, {a, 1, genes}], genenames, matrix];
matrix = Sort[matrix, OrderedQ[{{#1, #2}} &];
fullgenenames = TakeColumns[
  TakeRows[matrix, {1, numbers[[1]]}],
  {2, 4}];
fullmatrix = TakeColumns[
  TakeRows[matrix, {1, numbers[[1]]}],
  {5, arrays + 4}];
missinggenenames1 = TakeColumns[
  TakeRows[matrix, {numbers[[1]] + 1, numbers[[1]] + numbers[[2]]}],
  {2, 4}];
missingmatrix1 = TakeColumns[
  TakeRows[matrix, {numbers[[1]] + 1, numbers[[1]] + numbers[[2]]}],
  {5, arrays + 4}];
missinggenenames2 = TakeColumns[
  TakeRows[matrix,
    {numbers[[1]] + numbers[[2]] + 1,
     numbers[[1]] + numbers[[2]] + numbers[[3]]}],
  {2, 4}];
missingmatrix2 = TakeColumns[
  TakeRows[matrix,
    {numbers[[1]] + numbers[[2]] + 1,
     numbers[[1]] + numbers[[2]] + numbers[[3]]}],
  {5, arrays + 4}];
missinggenenames3 = TakeColumns[
  TakeRows[matrix,
    {numbers[[1]] + numbers[[2]] + numbers[[3]] + 1,
     numbers[[1]] + numbers[[2]] + numbers[[3]] + numbers[[4]]}],
  {2, 4}];
missingmatrix3 = TakeColumns[
  TakeRows[matrix,
    {numbers[[1]] + numbers[[2]] + numbers[[3]] + 1,
     numbers[[1]] + numbers[[2]] + numbers[[3]] + numbers[[4]]}],
  {5, arrays + 4}];
```

```
(* Locate Array Position of Null Data *)
```

```
locator1 = Table[0, {numbers[[2]]}];  
Do[  
  locator1[[a]] = locator1[[a]] + Flatten[Position[missingmatrix1[[a]], Null],  
    {a, 1, numbers[[2]]}];  
locator2 = Table[0, {numbers[[3]]}];  
Do[  
  locator2[[a]] = locator2[[a]] + Flatten[Position[missingmatrix2[[a]], Null],  
    {a, 1, numbers[[3]]}];  
locator3 = Table[0, {numbers[[4]]}];  
Do[  
  locator3[[a]] = locator3[[a]] + Flatten[Position[missingmatrix3[[a]], Null],  
    {a, 1, numbers[[4]]}];
```

```
(* Sort Raw Data According to the Position of Missing Data Points for Each Gene *)
```

```
missingmatrix1 = AppendRows[locator1, missinggenenames1, missingmatrix1];  
missingmatrix1 = Sort[missingmatrix1, OrderedQ[{{#1, #2}} &];  
locator1 = TakeColumns[missingmatrix1, {1, 1}];  
missinggenenames1 = TakeColumns[missingmatrix1, {2, 4}];  
missingmatrix1 = TakeColumns[missingmatrix1, {5, arrays + 4}];  
missingmatrix2 = AppendRows[locator2, missinggenenames2, missingmatrix2];  
missingmatrix2 = Sort[missingmatrix2, OrderedQ[{{#1, #2}} &];  
locator2 = TakeColumns[missingmatrix2, {1, 2}];  
missinggenenames2 = TakeColumns[missingmatrix2, {3, 5}];  
missingmatrix2 = TakeColumns[missingmatrix2, {6, arrays + 5}];  
missingmatrix3 = AppendRows[locator3, missinggenenames3, missingmatrix3];  
missingmatrix3 = Sort[missingmatrix3, OrderedQ[{{#1, #2}} &];  
locator3 = TakeColumns[missingmatrix3, {1, 3}];  
missinggenenames3 = TakeColumns[missingmatrix3, {4, 6}];  
missingmatrix3 = TakeColumns[missingmatrix3, {7, arrays + 6}];
```

```
(* Examine Subset of Genes with Full Data *)
```

```
(* Calculate SVD *)
```

```
{eigenarrays, eigenexpressions, eigengenest} = SingularValues[fullmatrix];  
eigenarrays = Transpose[eigenarrays];  
fractions = eigenexpressions^2 / Sum[eigenexpressions[[a]]^2, {a, 1, arrays}];  
entropy = -N[Sum[fractions[[a]] * Log[fractions[[a]]], {a, 1, arrays}] / Log[arrays];  
entropy = N[Round[100 * entropy] / 100]
```

```
0.19
```

```
(* Create Fractions Bar Charts Displays *)
```

```
fractions[[3]]
```

```
0.0100742
```

```

limit = 0.012;
Clear[gridx, framex, framey];
gridx = Table[a, {a, 0, limit, N[limit/3]}];
framex = gridx;
framex = Table[{gridx[[a]], framex[[a]]}, {a, 1, 4}];
gridx = Table[{gridx[[a]], RGBColor[0, 0, 0]}, {a, 1, 4}];
framey = Table[{a + 1, arrays - a - 6}, {a, 0, 12 - 3}];
table = Table[fractions[[arrays - a]], {a, 6, arrays - 3}];
g = BarChart[table,
  BarOrientation -> Horizontal,
  PlotRange -> {{0, limit * 1.0001}, {0.5, 11 - 2 + 0.5}},
  AspectRatio -> 1,
  Axes -> False,
  Frame -> True,
  FrameTicks -> {None, framey, framex, None},
  FrameLabel -> {None, None, None, None},
  GridLines -> {gridx, None},
  DisplayFunction -> Identity];
g = FullGraphics[g];
g[[1, 2]] = g[[1, 2]] /.
  Text[a_, {b_, c_}, {0., -1.}] ->
  Text[a, {b, c}, {0, -1}, {0, 1}];
g1 = Show[g,
  AspectRatio -> 1.25,
  PlotRange -> All,
  DisplayFunction -> Identity];

gridx = Table[a, {a, 0, 1, 0.2}];
framex = gridx;
framex = Table[{gridx[[a]], framex[[a]]}, {a, 1, 6}];
framex[[6]] = {1, "1"};
gridx = Table[{gridx[[a]], RGBColor[0, 0, 0]}, {a, 1, 6}];
framey = Table[{a + 1, arrays - a}, {a, 0, arrays - 1}];
labelx = ColumnForm[
  {"(b) Eigenexpression Fraction", StringJoin["d2 = ", ToString[entropy]], " "},
  Center];
g = BarChart[
  Table[fractions[[arrays - a]], {a, 0, arrays - 1}],
  BarOrientation -> Horizontal,
  PlotRange -> {{0, 1.0001}, {0.5, arrays + 0.5}},
  AspectRatio -> 1,
  Axes -> False,
  Frame -> True,
  FrameTicks -> {None, framey, framex, None},
  FrameLabel -> {None, None, labelx, None},
  GridLines -> {gridx, None},
  DisplayFunction -> Identity];
g = FullGraphics[g];
g[[1, 2]] = g[[1, 2]] /.
  Text[labelx, {b_, c_}, {0., -1.}] ->
  Text[labelx, {b, c + 3}, {0, -1}, {1, 0}];
g[[1, 2]] = g[[1, 2]] /.
  Text[a_, {b_, c_}, {0., -1.}] ->
  Text[a, {b, c}, {0, -1}, {0, 1}];
g2 = Show[{g,
  Graphics[{RGBColor[1, 1, 0.8], Rectangle[{0.15, 0.6}, {0.98, 15.5}]}],
  Graphics[{Rectangle[{0.1, 0.6}, {0.98, 15.5}, g1}]}],
  AspectRatio -> 1.35,
  PlotRange -> All,
  DisplayFunction -> Identity];

```

```
(* Create Eigengenes 2D Red & Green Raster Display *)
```

```
contrast = 3.5;
displaying = Table[
  If[contrast * eigengenes[[i, j]] > 0,
    If[contrast * eigengenes[[i, j]] < 1, {contrast * eigengenes[[i, j]], 0}, {1, 0}],
    If[contrast * eigengenes[[i, j]] > -1, {0, -contrast * eigengenes[[i, j]]}, {0, 1}]],
  {i, 1, arrays}, {j, 1, arrays}];
framex = Table[{a - 0.5, arraynames[[1, a]]}, {a, 1, arrays}];
framey = Table[{a + 1 - 0.5, arrays - a}, {a, 0, arrays - 1}];
labely = "Eigengenes";
labelx = ColumnForm[{"(a) Arrays", " ", " "}, Center];
g = Show[
  Graphics[
    RasterArray[
      Table[
        RGBColor[displaying[[i, j, 1]], displaying[[i, j, 2]], 0],
        {i, arrays, 1, -1}, {j, 1, arrays}]]],
  AspectRatio -> 1,
  Frame -> True,
  FrameTicks -> {None, framey, framex, None},
  FrameLabel -> {None, labely, labelx, None},
  DisplayFunction -> Identity];
g = FullGraphics[g];
g[[1, 2]] = g[[1, 2]] /.
  Text[labely, {b_, c_}, {1., 0.}] ->
  Text[labely, {b - 3, c}, {0, 0}, {0, 1}];
g[[1, 2]] = g[[1, 2]] /.
  Text[labelx, {b_, c_}, {0., -1.}] ->
  Text[labelx, {b, c + 3}, {0, -1}, {1, 0}];
g[[1, 2]] = g[[1, 2]] /.
  Text[a_, {b_, c_}, {0., -1.}] ->
  Text[a, {b, c}, {0, -1}, {0, 1}];
g1 = Show[g,
  AspectRatio -> 1.05,
  PlotRange -> All,
  DisplayFunction -> Identity];
```

```
(* Create Selected Eigengenes Graph Display *)
```

```
p = Table[0, {5}];
color = {RGBColor[1, 0, 0], RGBColor[0, 0, 1], RGBColor[0, 0.5, 0],
  RGBColor[1, 0.5, 0], RGBColor[0.75, 0, 1]};
xlabels = {"(c) Arrays", " ", " ", "(d) Arrays", " "};
ylabels = {" ", "Expression Level"}, {" ", " "}, {" ", " "}, {" ", " "}, {" ", " "};
framex = Table[{a - 1, arraynames[[1, a]]}, {a, 1, arrays}];
framey = {-1, -0.5, 0, 0.5, 1};
flag = 0;
```

```

Do[{
  labelx = ColumnForm[{xlabels[[n]], Center},
  labely = ColumnForm[{ylabels[[n]], Center},
  coordinates = Table[{a - 1, eigengenes[[n, a]]}, {a, 1, arrays}],
  points = Table[Point[coordinates[[a]]], {a, 1, arrays}],
  line = Line[coordinates],
  If[n == 4, flag = 0],
  g = Show[{
    Graphics[{color[[n]], PointSize[0.022], points}],
    Graphics[{color[[n]], line}],
    If[flag == 0,
      {FrameLabel -> {None, labely, labelx, None},
      FrameTicks -> {None, framey, framex, None}},
      {FrameLabel -> {None, labely, labelx, None},
      FrameTicks -> {None, None, None, None}}],
    Frame -> True,
    GridLines -> {None, {{0, RGBColor[0, 0, 0]}}},
    PlotRange -> {-1.05, 1.05},
    DisplayFunction -> Identity],
  g = FullGraphics[g],
  g[[1, 2]] = g[[1, 2]] /.
  Text[labely, {b_, c_}, {1., 0.}] ->
  Text[labely, {b - 5.4, c}, {0, 0}, {0, 1}],
  g[[1, 2]] = g[[1, 2]] /.
  Text[labelx, {b_, c_}, {0., -1.}] ->
  Text[labelx, {b, c + 0.625}, {0, -1}, {1, 0}],
  g[[1, 2]] = g[[1, 2]] /.
  Text[a_, {b_, c_}, {0., -1.}] ->
  Text[a, {b, c}, {0, -1}, {0, 1}],
  flag = flag + 1,
  p[[n]] = Show[g,
  AspectRatio -> 1.05,
  PlotRange -> All,
  DisplayFunction -> Identity]],
{n, 1, 5}]

```

(\* Display Selected Eigengenes \*)

```

g3 = Show[{p[[1]], p[[2]], p[[3]]}, DisplayFunction -> Identity];
g4 = Show[{p[[4]], p[[5]]}, DisplayFunction -> Identity];

```

(\* Display Eigengenes, Fractions and Selected Eigengenes \*)

```

Show[GraphicsArray[{g1, g2, g3, g4}],
GraphicsSpacing -> -0.15];

```

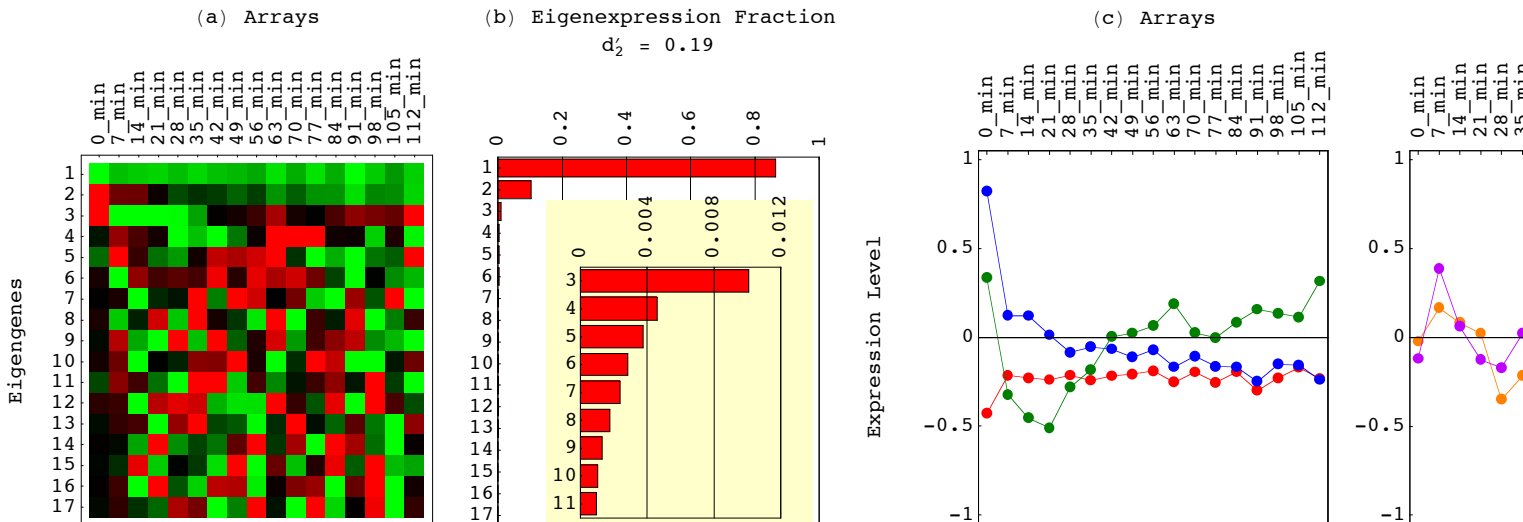



(\* Choose Subset of Eigengenes for Estimation \*)

```
eigengenes = TakeRows[eigengenes, {1, 5}];
```

(\* Estimate Missing Data \*)

```
Do[
  missingmatrix1[[a, locator1[[a, 1]]] =
    N[Round[Flatten[Dot[Dot[
      Transpose[Drop[
        Transpose[{missingmatrix1[[a]]}],
        {locator1[[a, 1]]}],
      PseudoInverse[Transpose[Drop[
        Transpose[eigengenes],
        {locator1[[a, 1]]}],
      eigengenes]][[locator1[[a, 1]]] * 100] / 100],
    {a, 1, numbers[[2]]}]

Do[Do[
  missingmatrix2[[a, locator2[[a, b]]] =
    N[Round[Flatten[Dot[Dot[
      Transpose[Drop[Drop[
        Transpose[{missingmatrix2[[a]]}],
        {locator2[[a, 2]]}, {locator2[[a, 1]]}],
      PseudoInverse[Transpose[Drop[Drop[
        Transpose[eigengenes],
        {locator2[[a, 2]]}, {locator2[[a, 1]]}],
      eigengenes]][[locator2[[a, b]]] * 100] / 100],
    {b, 1, 2}],
    {a, 1, numbers[[3]]}]

Do[Do[
  missingmatrix3[[a, locator3[[a, b]]] =
    N[Round[Flatten[Dot[Dot[
      Transpose[Drop[Drop[Drop[
        Transpose[{missingmatrix3[[a]]}],
        {locator3[[a, 3]]}, {locator3[[a, 2]]}, {locator3[[a, 1]]}],
      PseudoInverse[Transpose[Drop[Drop[Drop[
        Transpose[eigengenes],
        {locator3[[a, 3]]}, {locator3[[a, 2]]}, {locator3[[a, 1]]}],
      eigengenes]][[locator3[[a, b]]] * 100] / 100],
    {b, 1, 3}],
    {a, 1, numbers[[4]]}]

genenames = AppendColumns[
  fullgenenames,
  missinggenenames1,
  missinggenenames2,
  missinggenenames3];

matrix = AppendColumns[
  fullmatrix,
  missingmatrix1,
  missingmatrix2,
  missingmatrix3];
{genes, arrays} = Dimensions[matrix];
matrix2 = matrix;
genenames2 = genenames;
arraynames2 = arraynames;
{genes2, arrays2} = Dimensions[matrix2]

{4772, 17}
```

```
(* Examine S. cerevisiae Data After Missing Data Estimation *)
```

```
(* Calculate SVD *)
```

```
{eigenarrays, eigenexpressions, eigengenes} = SingularValues[matrix];  
eigengenes[[4]] = -eigengenes[[4]];  
eigenarrays = Transpose[eigenarrays];  
fractions = eigenexpressions^2 / Sum[eigenexpressions[[a]]^2, {a, 1, arrays}];  
entropy = -N[Sum[fractions[[a]] * Log[fractions[[a]]], {a, 1, arrays}] / Log[arrays];  
entropy = N[Round[100 * entropy] / 100]
```

```
0.19
```

```
(* Create Fractions Bar Charts Displays *)
```

```
fractions[[3]]
```

```
0.0104045
```

```
limit = 0.012;  
Clear[gridx, framex, framey];  
gridx = Table[a, {a, 0, limit, N[limit/3]}];  
framex = gridx;  
framey = Table[{gridx[[a]], framex[[a]]}, {a, 1, 4}];  
gridx = Table[{gridx[[a]], RGBColor[0, 0, 0]}, {a, 1, 4}];  
framey = Table[{a + 1, arrays - a - 6}, {a, 0, 12 - 3}];  
table = Table[fractions[[arrays - a]], {a, 6, arrays - 3}];  
g = BarChart[table,  
  BarOrientation -> Horizontal,  
  PlotRange -> {{0, limit * 1.0001}, {0.5, 11 - 2 + 0.5}},  
  AspectRatio -> 1,  
  Axes -> False,  
  Frame -> True,  
  FrameTicks -> {None, framey, framex, None},  
  FrameLabel -> {None, None, None, None},  
  GridLines -> {gridx, None},  
  DisplayFunction -> Identity];  
g = FullGraphics[g];  
g[[1, 2]] = g[[1, 2]] /.  
  Text[a_, {b_, c_}, {0., -1.}] ->  
  Text[a, {b, c}, {0, -1}, {0, 1}];  
g1 = Show[g,  
  AspectRatio -> 1.25,  
  PlotRange -> All,  
  DisplayFunction -> Identity];  
  
gridx = Table[a, {a, 0, 1, 0.2}];  
framex = gridx;  
framey = Table[{gridx[[a]], framex[[a]]}, {a, 1, 6}];  
framey[[6]] = {1, "1"};  
gridx = Table[{gridx[[a]], RGBColor[0, 0, 0]}, {a, 1, 6}];  
framey = Table[{a + 1, arrays - a}, {a, 0, arrays - 1}];  
labelx = ColumnForm[  
  {"(b) Eigenexpression Fraction", StringJoin["d2 = ", ToString[entropy]], " "},  
  Center];  
g = BarChart[  
  Table[fractions[[arrays - a]], {a, 0, arrays - 1}],  
  BarOrientation -> Horizontal,  
  PlotRange -> {{0, 1.0001}, {0.5, arrays + 0.5}},  
  AspectRatio -> 1,  
  Axes -> False,  
  Frame -> True,  
  FrameTicks -> {None, framey, framex, None},  
  FrameLabel -> {None, None, labelx, None},  
  GridLines -> {gridx, None},  
  DisplayFunction -> Identity];
```

```

g = FullGraphics[g];
g[[1, 2]] = g[[1, 2]] /.
  Text[labelx, {b_, c_}, {0., -1.}] ->
  Text[labelx, {b, c + 3}, {0, -1}, {1, 0}];
g[[1, 2]] = g[[1, 2]] /.
  Text[a_, {b_, c_}, {0., -1.}] ->
  Text[a, {b, c}, {0, -1}, {0, 1}];
g2 = Show[{g,
  Graphics[{RGBColor[1, 1, 0.8], Rectangle[{0.15, 0.6}, {0.98, 15.5}]}],
  Graphics[{Rectangle[{0.1, 0.6}, {0.98, 15.5}, g1}]}],
  AspectRatio -> 1.35,
  PlotRange -> All,
  DisplayFunction -> Identity];

```

(\* Create Eigengenes 2 D Red & Green Raster Display \*)

```

contrast = 3.5;
displaying = Table[
  If[contrast * eigengenes[[i, j]] > 0,
    If[contrast * eigengenes[[i, j]] < 1, {contrast * eigengenes[[i, j]], 0}, {1, 0}],
    If[contrast * eigengenes[[i, j]] > -1, {0, -contrast * eigengenes[[i, j]]}, {0, 1}]],
  {i, 1, arrays}, {j, 1, arrays}];
framex = Table[{a - 0.5, arraynames[[1, a]]}, {a, 1, arrays}];
framey = Table[{a + 1 - 0.5, arrays - a}, {a, 0, arrays - 1}];
labely = "Eigengenes";
labelx = ColumnForm[{"(a) Arrays", " ", " "}, Center];
g = Show[
  Graphics[
    RasterArray[
      Table[
        RGBColor[displaying[[i, j, 1]], displaying[[i, j, 2]], 0],
        {i, arrays, 1, -1}, {j, 1, arrays}]]],
  AspectRatio -> 1,
  Frame -> True,
  FrameTicks -> {None, framey, framex, None},
  FrameLabel -> {None, labely, labelx, None},
  DisplayFunction -> Identity];
g = FullGraphics[g];
g[[1, 2]] = g[[1, 2]] /.
  Text[labely, {b_, c_}, {1., 0.}] ->
  Text[labely, {b - 3, c}, {0, 0}, {0, 1}];
g[[1, 2]] = g[[1, 2]] /.
  Text[labelx, {b_, c_}, {0., -1.}] ->
  Text[labelx, {b, c + 3}, {0, -1}, {1, 0}];
g[[1, 2]] = g[[1, 2]] /.
  Text[a_, {b_, c_}, {0., -1.}] ->
  Text[a, {b, c}, {0, -1}, {0, 1}];
g1 = Show[g,
  AspectRatio -> 1.05,
  PlotRange -> All,
  DisplayFunction -> Identity];

```

(\* Create Selected Eigengenes Graph Display \*)

```

p = Table[0, {5}];
color = {RGBColor[1, 0, 0], RGBColor[0, 0, 1], RGBColor[0, 0.5, 0],
  RGBColor[1, 0.5, 0], RGBColor[0.75, 0, 1]};
xlabels = {"(c) Arrays", " ", " ", "(d) Arrays", " "};
ylabels = {" ", "Expression Level"}, {" ", " "}, {" ", " "}, {" ", " "}, {" ", " "};
framex = Table[{a - 1, arraynames[[1, a]]}, {a, 1, arrays}];
framey = {-1, -0.5, 0, 0.5, 1};
flag = 0;

```

```

Do[{
  labelx = ColumnForm[{xlabels[[n]], Center},
  labely = ColumnForm[{ylabels[[n]], Center},
  coordinates = Table[{a - 1, eigengenes[[n, a]]}, {a, 1, arrays}],
  points = Table[Point[coordinates[[a]]], {a, 1, arrays}],
  line = Line[coordinates],
  If[n == 4, flag = 0],
  g = Show[{
    Graphics[{color[[n]], PointSize[0.022], points}],
    Graphics[{color[[n]], line}],
    If[flag == 0,
      {FrameLabel -> {None, labely, labelx, None},
      FrameTicks -> {None, framey, framex, None}},
      {FrameLabel -> {None, labely, labelx, None},
      FrameTicks -> {None, None, None, None}}],
    Frame -> True,
    GridLines -> {None, {{0, RGBColor[0, 0, 0]}}},
    PlotRange -> {-1.05, 1.05},
    DisplayFunction -> Identity],
  g = FullGraphics[g],
  g[[1, 2]] = g[[1, 2]] /.
  Text[labely, {b_, c_}, {1., 0.}] ->
  Text[labely, {b - 5.4, c}, {0, 0}, {0, 1}],
  g[[1, 2]] = g[[1, 2]] /.
  Text[labelx, {b_, c_}, {0., -1.}] ->
  Text[labelx, {b, c + 0.625}, {0, -1}, {1, 0}],
  g[[1, 2]] = g[[1, 2]] /.
  Text[a_, {b_, c_}, {0., -1.}] ->
  Text[a, {b, c}, {0, -1}, {0, 1}],
  flag = flag + 1,
  p[[n]] = Show[g,
  AspectRatio -> 1.05,
  PlotRange -> All,
  DisplayFunction -> Identity]],
{n, 1, 5}]

```

(\* Display Selected Eigengenes \*)

```

g3 = Show[{p[[1]], p[[2]], p[[3]]}, DisplayFunction -> Identity];
g4 = Show[{p[[4]], p[[5]]}, DisplayFunction -> Identity];

```

(\* Display Eigengenes, Fractions and Selected Eigengenes \*)

```

Show[GraphicsArray[{g1, g2, g3, g4}],
GraphicsSpacing -> -0.15];

```

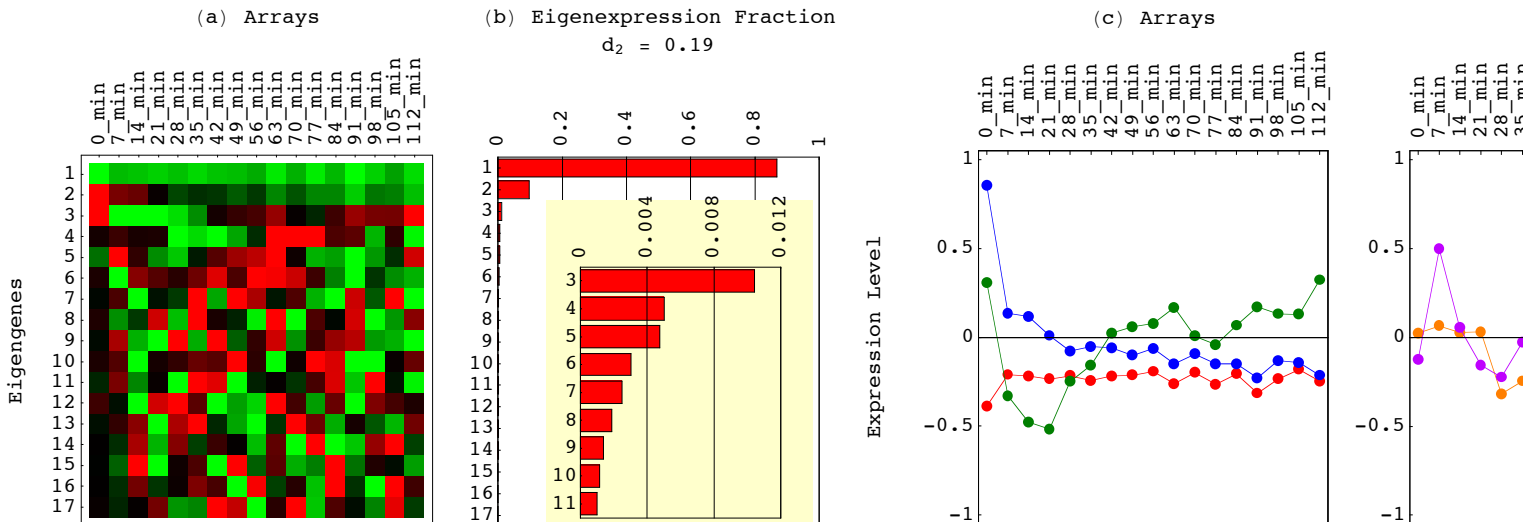

**(\* Estimate Missing Human Cell Cycle Data Using SVD \*)**

**(\* Read Human Data \*)**

```
stream = "Desktop/HO_GSVD/Data/Human.txt";
matrix = Import[stream, "Table"];
{genes, arrays} = Dimensions[matrix] - {1, 3}
Clear[stream];
```

```
{13068, 17}
```

```
genenames = TakeRows[
  TakeColumns[matrix, {1, 3}],
  {2, genes + 1}];
arraynames = TakeColumns[
  TakeRows[matrix, {1, 1}],
  {4, arrays + 3}];
matrix = TakeColumns[
  TakeRows[matrix, {2, genes + 1}],
  {4, arrays + 3}];
matrix = ToExpression[matrix];
```

**(\* Count Null Data \*)**

```
counter = Table[Dimensions[Position[matrix[[a]], Null]][[1]], {a, 1, genes}];
```

**(\* Locate Gene Position of Null Data \*)**

```
Clear[positions];
positions = Table[0, {a, 1, arrays + 1}];
Do[
  positions[[a]] = Flatten[
    Position[Flatten[counter], a - 1],
    {a, 1, arrays + 1}];
numbers = Flatten[
  Table[
    Dimensions[positions[[a]]],
    {a, 1, Round[arrays * 0.25]}];
```

**(\* Create Display Of Gene Position Of Null Data \*)**

```
framex = Table[{a, a - 1}, {a, 1, Round[arrays * 0.25]}];
framey = {1000, 2000, 3000, 4000, 5000};
labelx = ColumnForm[{"Number of Arrays"}, Center];
labely = ColumnForm[{"Number of Genes"}, Center];
g = BarChart[numbers,
  Frame -> True,
  Axes -> False,
  FrameLabel -> {labelx, labely, None, None},
  FrameTicks -> {framex, framey, None, None},
  GridLines -> {None, None},
  PlotRange -> {{0.5, Round[arrays * 0.25] + 0.5}, {0, 5000}},
  DisplayFunction -> Identity];
g = FullGraphics[g];
g[[1, 2]] = g[[1, 2]] /.
  Text[labely, {b_, c_}, {1., 0.}] ->
  Text[labely, {b - 0.75, c}, {0, 0}, {0, 1}];
g[[1, 2]] = g[[1, 2]] /.
  Text[labelx, {b_, c_}, {0., 1.}] ->
  Text[labelx, {b, c - 600}, {0, 1}, {1, 0}];
```

(\* Display Gene Position Of Null Data \*)

```
Show[g, PlotRange -> All];
```

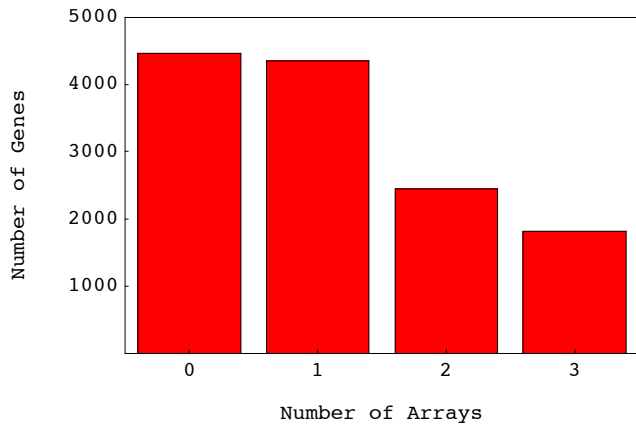

(\* Select Genes by Number of Missing Data Points \*)

```
matrix = AppendRows[Table[{counter[[a]]}, {a, 1, genes}], genenames, matrix];
matrix = Sort[matrix, OrderedQ[{{#1, #2}} &];
fullgenenames = TakeColumns[
  TakeRows[matrix, {1, numbers[[1]]}],
  {2, 4}];
fullmatrix = TakeColumns[
  TakeRows[matrix, {1, numbers[[1]]}],
  {5, arrays + 4}];
missinggenenames1 = TakeColumns[
  TakeRows[matrix, {numbers[[1]] + 1, numbers[[1]] + numbers[[2]]}],
  {2, 4}];
missingmatrix1 = TakeColumns[
  TakeRows[matrix, {numbers[[1]] + 1, numbers[[1]] + numbers[[2]]}],
  {5, arrays + 4}];
missinggenenames2 = TakeColumns[
  TakeRows[matrix,
    {numbers[[1]] + numbers[[2]] + 1,
    numbers[[1]] + numbers[[2]] + numbers[[3]]}],
  {2, 4}];
missingmatrix2 = TakeColumns[
  TakeRows[matrix,
    {numbers[[1]] + numbers[[2]] + 1,
    numbers[[1]] + numbers[[2]] + numbers[[3]]}],
  {5, arrays + 4}];
missinggenenames3 = TakeColumns[
  TakeRows[matrix,
    {numbers[[1]] + numbers[[2]] + numbers[[3]] + 1,
    numbers[[1]] + numbers[[2]] + numbers[[3]] + numbers[[4]]}],
  {2, 4}];
missingmatrix3 = TakeColumns[
  TakeRows[matrix,
    {numbers[[1]] + numbers[[2]] + numbers[[3]] + 1,
    numbers[[1]] + numbers[[2]] + numbers[[3]] + numbers[[4]]}],
  {5, arrays + 4}];
```

```
(* Locate Array Position of Null Data *)
```

```
locator1 = Table[0, {numbers[[2]]}];  
Do[  
  locator1[[a]] = locator1[[a]] + Flatten[Position[missingmatrix1[[a]], Null],  
    {a, 1, numbers[[2]]}];  
locator2 = Table[0, {numbers[[3]]}];  
Do[  
  locator2[[a]] = locator2[[a]] + Flatten[Position[missingmatrix2[[a]], Null],  
    {a, 1, numbers[[3]]}];  
locator3 = Table[0, {numbers[[4]]}];  
Do[  
  locator3[[a]] = locator3[[a]] + Flatten[Position[missingmatrix3[[a]], Null],  
    {a, 1, numbers[[4]]}];
```

```
(* Sort Raw Data According to the Position of Missing Data Points for Each Gene *)
```

```
missingmatrix1 = AppendRows[locator1, missinggenenames1, missingmatrix1];  
missingmatrix1 = Sort[missingmatrix1, OrderedQ[{{#1, #2}} &];  
locator1 = TakeColumns[missingmatrix1, {1, 1}];  
missinggenenames1 = TakeColumns[missingmatrix1, {2, 4}];  
missingmatrix1 = TakeColumns[missingmatrix1, {5, arrays + 4}];  
missingmatrix2 = AppendRows[locator2, missinggenenames2, missingmatrix2];  
missingmatrix2 = Sort[missingmatrix2, OrderedQ[{{#1, #2}} &];  
locator2 = TakeColumns[missingmatrix2, {1, 2}];  
missinggenenames2 = TakeColumns[missingmatrix2, {3, 5}];  
missingmatrix2 = TakeColumns[missingmatrix2, {6, arrays + 5}];  
missingmatrix3 = AppendRows[locator3, missinggenenames3, missingmatrix3];  
missingmatrix3 = Sort[missingmatrix3, OrderedQ[{{#1, #2}} &];  
locator3 = TakeColumns[missingmatrix3, {1, 3}];  
missinggenenames3 = TakeColumns[missingmatrix3, {4, 6}];  
missingmatrix3 = TakeColumns[missingmatrix3, {7, arrays + 6}];
```

```
(* Examine Subset of Genes with Full Data *)
```

```
(* Calculate SVD *)
```

```
{eigenarrays, eigenexpressions, eigengenest} = SingularValues[fullmatrix];  
eigenarrays = Transpose[eigenarrays];  
fractions = eigenexpressions^2 / Sum[eigenexpressions[[a]]^2, {a, 1, arrays}];  
entropy = -N[Sum[fractions[[a]] * Log[fractions[[a]]], {a, 1, arrays}] / Log[arrays];  
entropy = N[Round[100 * entropy] / 100]
```

```
0.05
```

```
(* Create Fractions Bar Charts Displays *)
```

```
fractions[[2]]
```

```
0.00599627
```

```

limit = 0.006;
Clear[gridx, framex, framey];
gridx = Table[a, {a, 0, limit, N[limit/3]}];
framex = gridx;
framex = Table[{gridx[[a]], framex[[a]]}, {a, 1, 4}];
gridx = Table[{gridx[[a]], RGBColor[0, 0, 0]}, {a, 1, 4}];
framey = Table[{a + 1, arrays - a - 6}, {a, 0, 12 - 3}];
table = Table[fractions[[arrays - a]], {a, 6, arrays - 2}];
g = BarChart[table,
  BarOrientation -> Horizontal,
  PlotRange -> {{0, limit * 1.0001}, {0.5, 12 - 2 + 0.5}},
  AspectRatio -> 1,
  Axes -> False,
  Frame -> True,
  FrameTicks -> {None, framey, framex, None},
  FrameLabel -> {None, None, None, None},
  GridLines -> {gridx, None},
  DisplayFunction -> Identity];
g = FullGraphics[g];
g[[1, 2]] = g[[1, 2]] /.
  Text[a_, {b_, c_}, {0., -1.}] ->
  Text[a, {b, c}, {0, -1}, {0, 1}];
g1 = Show[g,
  AspectRatio -> 1.25,
  PlotRange -> All,
  DisplayFunction -> Identity];

gridx = Table[a, {a, 0, 1, 0.2}];
framex = gridx;
framex = Table[{gridx[[a]], framex[[a]]}, {a, 1, 6}];
framex[[6]] = {1, "1"};
gridx = Table[{gridx[[a]], RGBColor[0, 0, 0]}, {a, 1, 6}];
framey = Table[{a + 1, arrays - a}, {a, 0, arrays - 1}];
labelx = ColumnForm[
  {"(b) Eigenexpression Fraction", StringJoin["d3 = ", ToString[entropy]], " "},
  Center];
g = BarChart[
  Table[fractions[[arrays - a]], {a, 0, arrays - 1}],
  BarOrientation -> Horizontal,
  PlotRange -> {{0, 1.0001}, {0.5, arrays + 0.5}},
  AspectRatio -> 1,
  Axes -> False,
  Frame -> True,
  FrameTicks -> {None, framey, framex, None},
  FrameLabel -> {None, None, labelx, None},
  GridLines -> {gridx, None},
  DisplayFunction -> Identity];
g = FullGraphics[g];
g[[1, 2]] = g[[1, 2]] /.
  Text[labelx, {b_, c_}, {0., -1.}] ->
  Text[labelx, {b, c + 3}, {0, -1}, {1, 0}];
g[[1, 2]] = g[[1, 2]] /.
  Text[a_, {b_, c_}, {0., -1.}] ->
  Text[a, {b, c}, {0, -1}, {0, 1}];
g2 = Show[{g,
  Graphics[{RGBColor[1, 1, 0.8], Rectangle[{0.1, 0.6}, {0.98, 15.5}]}],
  Graphics[{Rectangle[{0.1, 0.6}, {0.98, 15.5}, g1]}]},
  AspectRatio -> 1.35,
  PlotRange -> All,
  DisplayFunction -> Identity];

```



(\* Create Eigengenes 2D Red & Green Raster Display \*)

```
contrast = 3.5;
displaying = Table[
  If[contrast * eigengenes[[i, j]] > 0,
    If[contrast * eigengenes[[i, j]] < 1, {contrast * eigengenes[[i, j]], 0}, {1, 0}],
    If[contrast * eigengenes[[i, j]] > -1, {0, -contrast * eigengenes[[i, j]]}, {0, 1}]],
  {i, 1, arrays}, {j, 1, arrays}];
framex = Table[{a - 0.5, arraynames[[1, a]]}, {a, 1, arrays}];
framey = Table[{a + 1 - 0.5, arrays - a}, {a, 0, arrays - 1}];
labely = "Eigengenes";
labelx = ColumnForm[{"(a) Arrays", " ", " "}, Center];
g = Show[
  Graphics[
    RasterArray[
      Table[
        RGBColor[displaying[[i, j, 1]], displaying[[i, j, 2]], 0],
        {i, arrays, 1, -1}, {j, 1, arrays}]]],
  AspectRatio -> 1,
  Frame -> True,
  FrameTicks -> {None, framey, framex, None},
  FrameLabel -> {None, labely, labelx, None},
  DisplayFunction -> Identity];
g = FullGraphics[g];
g[[1, 2]] = g[[1, 2]] /.
  Text[labely, {b_, c_}, {1., 0.}] ->
  Text[labely, {b - 3, c}, {0, 0}, {0, 1}];
g[[1, 2]] = g[[1, 2]] /.
  Text[labelx, {b_, c_}, {0., -1.}] ->
  Text[labelx, {b, c + 3}, {0, -1}, {1, 0}];
g[[1, 2]] = g[[1, 2]] /.
  Text[a_, {b_, c_}, {0., -1.}] ->
  Text[a, {b, c}, {0, -1}, {0, 1}];
g1 = Show[g,
  AspectRatio -> 1.05,
  PlotRange -> All,
  DisplayFunction -> Identity];
```

(\* Create Selected Eigengenes Graph Display \*)

```
p = Table[0, {5}];
color =
  {RGBColor[1, 0, 0], RGBColor[0, 0, 1], RGBColor[0, 0.5, 0], RGBColor[1, 0.5, 0], RGBColor[0.75, 0, 1]};
xlabel = {"(c) Arrays", " ", " ", "(d) Arrays", " "};
ylabel = {" ", "Expression Level", {" ", " "}, {" ", " "}, {" ", " "}, {" ", " "}};
framex = Table[{a - 1, arraynames[[1, a]]}, {a, 1, arrays}];
framey = {-1, -0.5, 0, 0.5, 1};
flag = 0;
```

```

Do[
  labelx = ColumnForm[{xlabels[[n]]}, Center],
  labely = ColumnForm[{ylabels[[n]]}, Center],
  coordinates = Table[{a - 1, eigengenes[[n, a]]}, {a, 1, arrays}],
  points = Table[Point[coordinates[[a]]], {a, 1, arrays}],
  line = Line[coordinates],
  If[n == 4, flag = 0],
  g = Show[
    Graphics[{color[[n]], PointSize[0.022], points}],
    Graphics[{color[[n]], line}],
    If[flag == 0,
      {FrameLabel -> {None, labely, labelx, None},
       FrameTicks -> {None, framey, framex, None}},
      {FrameLabel -> {None, labely, labelx, None},
       FrameTicks -> {None, None, None, None}}],
    Frame -> True,
    GridLines -> {None, {{0, RGBColor[0, 0, 0]}}},
    PlotRange -> {-1.05, 1.05},
    DisplayFunction -> Identity],
  g = FullGraphics[g],
  g[[1, 2]] = g[[1, 2]] /.
    Text[labely, {b_, c_}, {1., 0.}] ->
    Text[labely, {b - 5.4, c}, {0, 0}, {0, 1}],
  g[[1, 2]] = g[[1, 2]] /.
    Text[labelx, {b_, c_}, {0., -1.}] ->
    Text[labelx, {b, c + 0.625}, {0, -1}, {1, 0}],
  g[[1, 2]] = g[[1, 2]] /.
    Text[a_, {b_, c_}, {0., -1.}] ->
    Text[a, {b, c}, {0, -1}, {0, 1}],
  flag = flag + 1,
  p[[n]] = Show[g,
    AspectRatio -> 1.05,
    PlotRange -> All,
    DisplayFunction -> Identity]],
{n, 1, 5}

```

(\* Display Selected Eigengenes \*)

```

g3 = Show[{p[[1]], p[[2]], p[[3]]}, DisplayFunction -> Identity];
g4 = Show[{p[[4]], p[[5]]}, DisplayFunction -> Identity];

```

(\* Display Eigengenes, Fractions and Selected Eigengenes \*)

```

Show[GraphicsArray[{g1, g2, g3, g4}],
  GraphicsSpacing -> -0.15];

```

(a) Arrays

(b) Eigenexpression Fraction  
 $d_3^2 = 0.05$

(c) Arrays

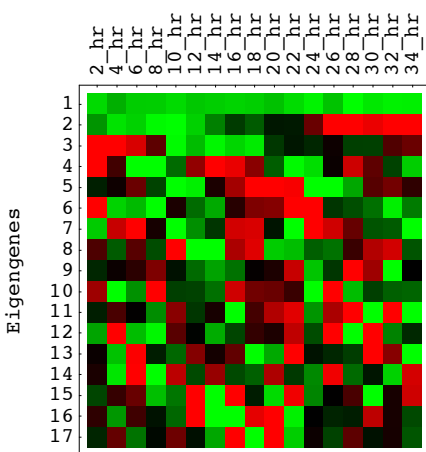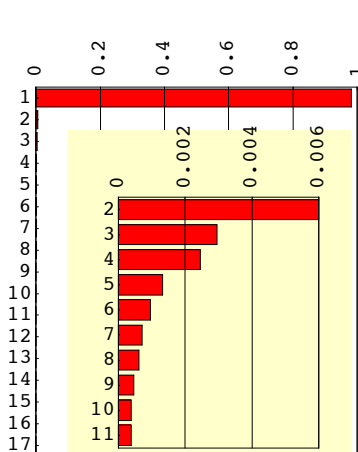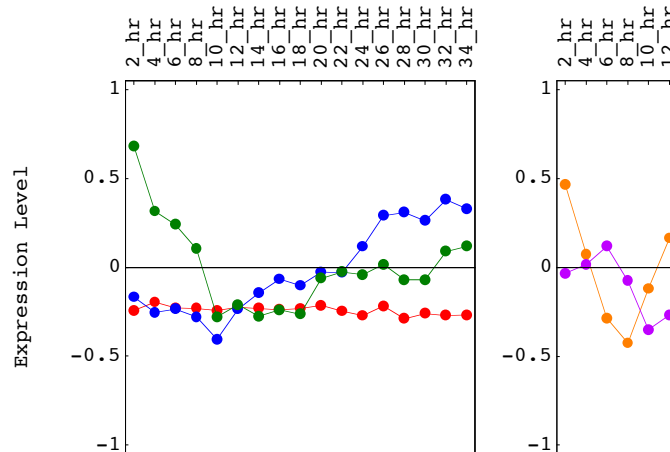

(\* Choose Subset of Eigengenes for Estimation \*)

```
eigengenes = TakeRows[eigengenes, {1, 5}];
```

(\* Estimate Missing Data \*)

```
Do[
  missingmatrix1[[a, locator1[[a, 1]]] =
    N[Round[Flatten[Dot[Dot[
      Transpose[Drop[
        Transpose[{missingmatrix1[[a]]}],
        {locator1[[a, 1]]}],
      PseudoInverse[Transpose[Drop[
        Transpose[eigengenes],
        {locator1[[a, 1]]}],
      eigengenes]][[locator1[[a, 1]]] * 100] / 100],
    {a, 1, numbers[[2]]}]

Do[Do[
  missingmatrix2[[a, locator2[[a, b]]] =
    N[Round[Flatten[Dot[Dot[
      Transpose[Drop[Drop[
        Transpose[{missingmatrix2[[a]]}],
        {locator2[[a, 2]]}, {locator2[[a, 1]]}],
      PseudoInverse[Transpose[Drop[Drop[
        Transpose[eigengenes],
        {locator2[[a, 2]]}, {locator2[[a, 1]]}],
      eigengenes]][[locator2[[a, b]]] * 100] / 100],
    {b, 1, 2}],
    {a, 1, numbers[[3]]}]

Do[Do[
  missingmatrix3[[a, locator3[[a, b]]] =
    N[Round[Flatten[Dot[Dot[
      Transpose[Drop[Drop[Drop[
        Transpose[{missingmatrix3[[a]]}],
        {locator3[[a, 3]]}, {locator3[[a, 2]]}, {locator3[[a, 1]]}],
      PseudoInverse[Transpose[Drop[Drop[Drop[
        Transpose[eigengenes],
        {locator3[[a, 3]]}, {locator3[[a, 2]]}, {locator3[[a, 1]]}],
      eigengenes]][[locator3[[a, b]]] * 100] / 100],
    {b, 1, 3}],
    {a, 1, numbers[[4]]}]

genenames = AppendColumns[
  fullgenenames,
  missinggenenames1,
  missinggenenames2,
  missinggenenames3];
matrix = AppendColumns[
  fullmatrix,
  missingmatrix1,
  missingmatrix2,
  missingmatrix3];
{genes, arrays} = Dimensions[matrix];
matrix3 = matrix;
genenames3 = genenames;
arraynames3 = arraynames;
{genes3, arrays3} = Dimensions[matrix3]

{13068, 17}
```

```
(* Examine Human Data After Missing Data Estimation *)
```

```
(* Calculate SVD *)
```

```
{eigenarrays, eigenexpressions, eigengenes} = SingularValues[matrix];  
eigenarrays = Transpose[eigenarrays];  
fractions = eigenexpressions^2 / Sum[eigenexpressions[[a]]^2, {a, 1, arrays}];  
entropy = -N[Sum[fractions[[a]] * Log[fractions[[a]]], {a, 1, arrays}] / Log[arrays];  
entropy = N[Round[100 * entropy] / 100]
```

```
0.04
```

```
(* Create Fractions Bar Charts Displays *)
```

```
fractions[[2]]
```

```
0.00538975
```

```
limit = 0.006;  
Clear[gridx, framex, framey];  
gridx = Table[a, {a, 0, limit, N[limit/3]}];  
framex = gridx;  
framey = Table[{gridx[[a]], framex[[a]]}, {a, 1, 4};  
gridx = Table[{gridx[[a]], RGBColor[0, 0, 0]}, {a, 1, 4};  
framey = Table[{a + 1, arrays - a - 6}, {a, 0, 12 - 3};  
table = Table[fractions[[arrays - a]], {a, 6, arrays - 2};  
g = BarChart[table,  
  BarOrientation -> Horizontal,  
  PlotRange -> {{0, limit * 1.0001}, {0.5, 12 - 2 + 0.5}},  
  AspectRatio -> 1,  
  Axes -> False,  
  Frame -> True,  
  FrameTicks -> {None, framey, framex, None},  
  FrameLabel -> {None, None, None, None},  
  GridLines -> {gridx, None},  
  DisplayFunction -> Identity];  
g = FullGraphics[g];  
g[[1, 2]] = g[[1, 2]] /.  
  Text[a_, {b_, c_}, {0., -1.}] ->  
  Text[a, {b, c}, {0, -1}, {0, 1}];  
g1 = Show[g,  
  AspectRatio -> 1.25,  
  PlotRange -> All,  
  DisplayFunction -> Identity];  
  
gridx = Table[a, {a, 0, 1, 0.2}];  
framex = gridx;  
framey = Table[{gridx[[a]], framex[[a]]}, {a, 1, 6};  
framey[[6]] = {1, "1"};  
gridx = Table[{gridx[[a]], RGBColor[0, 0, 0]}, {a, 1, 6};  
framey = Table[{a + 1, arrays - a}, {a, 0, arrays - 1};  
labelx = ColumnForm[  
  {"(b) Eigenexpression Fraction", StringJoin["d3 = ", ToString[entropy], " "],  
  Center];  
g = BarChart[  
  Table[fractions[[arrays - a]], {a, 0, arrays - 1},  
  BarOrientation -> Horizontal,  
  PlotRange -> {{0, 1.0001}, {0.5, arrays + 0.5}},  
  AspectRatio -> 1,  
  Axes -> False,  
  Frame -> True,  
  FrameTicks -> {None, framey, framex, None},  
  FrameLabel -> {None, None, labelx, None},  
  GridLines -> {gridx, None},  
  DisplayFunction -> Identity];
```

```

g = FullGraphics[g];
g[[1, 2]] = g[[1, 2]] /.
  Text[labelx, {b_, c_}, {0., -1.}] ->
  Text[labelx, {b, c + 3}, {0, -1}, {1, 0}];
g[[1, 2]] = g[[1, 2]] /.
  Text[a_, {b_, c_}, {0., -1.}] ->
  Text[a, {b, c}, {0, -1}, {0, 1}];
g2 = Show[{g,
  Graphics[{RGBColor[1, 1, 0.8], Rectangle[{0.1, 0.6}, {0.98, 15.5}]}],
  Graphics[{Rectangle[{0.1, 0.6}, {0.98, 15.5}, g1]}]},
  AspectRatio -> 1.35,
  PlotRange -> All,
  DisplayFunction -> Identity];

```

(\* Create Eigengenes 2 D Red & Green Raster Display \*)

```

contrast = 3.5;
displaying = Table[
  If[contrast * eigengenes[[i, j]] > 0,
    If[contrast * eigengenes[[i, j]] < 1, {contrast * eigengenes[[i, j]], 0}, {1, 0}],
    If[contrast * eigengenes[[i, j]] > -1, {0, -contrast * eigengenes[[i, j]]}, {0, 1}]],
  {i, 1, arrays}, {j, 1, arrays}];
framex = Table[{a - 0.5, arraynames[[1, a]]}, {a, 1, arrays}];
framey = Table[{a + 1 - 0.5, arrays - a}, {a, 0, arrays - 1}];
labely = "Eigengenes";
labelx = ColumnForm[{"(a) Arrays", " ", " "}, Center];
g = Show[
  Graphics[
    RasterArray[
      Table[
        RGBColor[displaying[[i, j, 1]], displaying[[i, j, 2]], 0],
        {i, arrays, 1, -1}, {j, 1, arrays}]]],
  AspectRatio -> 1,
  Frame -> True,
  FrameTicks -> {None, framey, framex, None},
  FrameLabel -> {None, labely, labelx, None},
  DisplayFunction -> Identity];
g = FullGraphics[g];
g[[1, 2]] = g[[1, 2]] /.
  Text[labely, {b_, c_}, {1., 0.}] ->
  Text[labely, {b - 3, c}, {0, 0}, {0, 1}];
g[[1, 2]] = g[[1, 2]] /.
  Text[labelx, {b_, c_}, {0., -1.}] ->
  Text[labelx, {b, c + 3}, {0, -1}, {1, 0}];
g[[1, 2]] = g[[1, 2]] /.
  Text[a_, {b_, c_}, {0., -1.}] ->
  Text[a, {b, c}, {0, -1}, {0, 1}];
g1 = Show[g,
  AspectRatio -> 1.05,
  PlotRange -> All,
  DisplayFunction -> Identity];

```

(\* Create Selected Eigengenes Graph Display \*)

```

p = Table[0, {5}];
color =
  {RGBColor[1, 0, 0], RGBColor[0, 0, 1], RGBColor[0, 0.5, 0], RGBColor[1, 0.5, 0], RGBColor[0.75, 0, 1]};
xlabels = {"(c) Arrays", " ", " ", "(d) Arrays", " "};
ylabels = {" ", "Expression Level"}, {" ", " "}, {" ", " "}, {" ", " "}, {" ", " "};
framex = Table[{a - 1, arraynames[[1, a]]}, {a, 1, arrays}];
framey = {-1, -0.5, 0, 0.5, 1};
flag = 0;

```

```

Do[{
  labelx = ColumnForm[{xlabels[[n]]}, Center];
  labely = ColumnForm[{ylabels[[n]]}, Center];
  coordinates = Table[{a - 1, eigengenes[[n, a]]}, {a, 1, arrays}];
  points = Table[Point[coordinates[[a]]], {a, 1, arrays};
  line = Line[coordinates];
  If[n == 4, flag = 0];
  g = Show[{
    Graphics[{color[[n]], PointSize[0.022], points}],
    Graphics[{color[[n]], line}],
    If[flag == 0,
      {FrameLabel -> {None, labely, labelx, None},
       FrameTicks -> {None, framey, framex, None}},
      {FrameLabel -> {None, labely, labelx, None},
       FrameTicks -> {None, None, None, None}}],
    Frame -> True,
    GridLines -> {None, {{0, RGBColor[0, 0, 0]}}},
    PlotRange -> {-1.05, 1.05},
    DisplayFunction -> Identity],
  g = FullGraphics[g],
  g[[1, 2]] = g[[1, 2]] /.
  Text[labely, {b_, c_}, {1., 0.}] ->
  Text[labely, {b - 5.4, c}, {0, 0}, {0, 1}],
  g[[1, 2]] = g[[1, 2]] /.
  Text[labelx, {b_, c_}, {0., -1.}] ->
  Text[labelx, {b, c + 0.625}, {0, -1}, {1, 0}],
  g[[1, 2]] = g[[1, 2]] /.
  Text[a_, {b_, c_}, {0., -1.}] ->
  Text[a, {b, c}, {0, -1}, {0, 1}],
  flag = flag + 1,
  p[[n]] = Show[g,
  AspectRatio -> 1.05,
  PlotRange -> All,
  DisplayFunction -> Identity]],
{n, 1, 5}]

```

(\* Display Selected Eigengenes \*)

```

g3 = Show[{p[[1]], p[[2]], p[[3]]}, DisplayFunction -> Identity];
g4 = Show[{p[[4]], p[[5]]}, DisplayFunction -> Identity];

```

(\* Display Eigengenes, Fractions and Selected Eigengenes \*)

```

Show[GraphicsArray[{g1, g2, g3, g4}],
  GraphicsSpacing -> -0.15];

```

(a) Arrays

(b) Eigenexpression Fraction  
 $d_3 = 0.04$

(c) Arrays

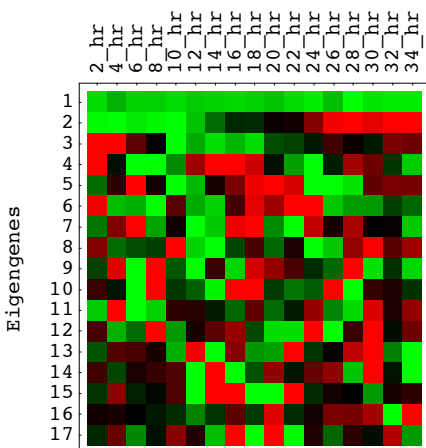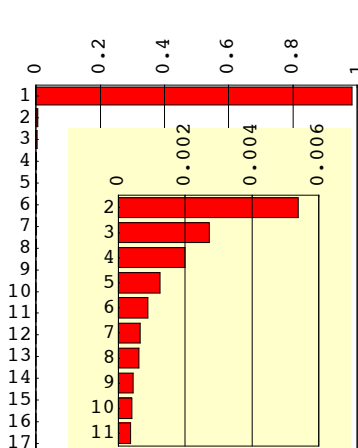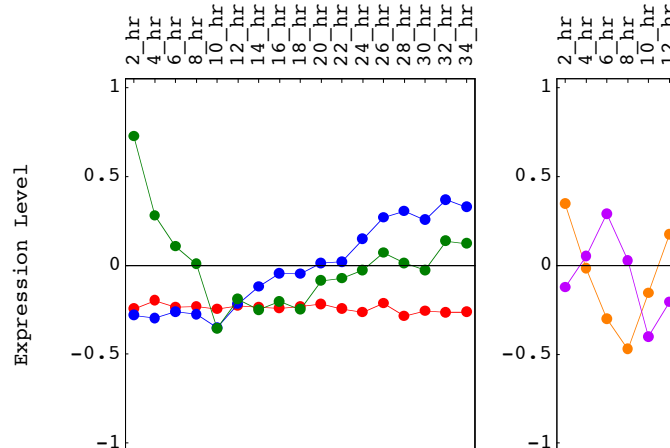

```
(* HO GSVD of S. pombe, S. cerevisiae and Human Cell Cycle Datasets *)
```

```
(* Calculate HO GSVD of S. pombe, S. cerevisiae and Human Cell Cycle Datasets *)
```

```
cor1 = Dot[Transpose[matrix1], matrix1];
cor2 = Dot[Transpose[matrix2], matrix2];
cor3 = Dot[Transpose[matrix3], matrix3];
cor = Dot[cor1, Inverse[cor2]] + Dot[cor2, Inverse[cor1]] + Dot[cor2, Inverse[cor3]] +
      Dot[cor3, Inverse[cor2]] + Dot[cor1, Inverse[cor3]] + Dot[cor3, Inverse[cor1]];
{values, vectors} = Eigensystem[cor];
values = values / 6;
genelets = vectors;
Do[genelets[[a]] = genelets[[a]] / Sqrt[Dot[genelets[[a]], genelets[[a]]], {a, 1, arrays}];

arraylets1 = Dot[matrix1, Inverse[genelets]];
arraylets2 = Dot[matrix2, Inverse[genelets]];
arraylets3 = Dot[matrix3, Inverse[genelets]];
arraylets1 = Transpose[arraylets1];
Do[arraylets1[[a]] = arraylets1[[a]] / Sqrt[Dot[arraylets1[[a]], arraylets1[[a]]], {a, 1, arrays}];
arraylets1 = Transpose[arraylets1];
arraylets2 = Transpose[arraylets2];
Do[arraylets2[[a]] = arraylets2[[a]] / Sqrt[Dot[arraylets2[[a]], arraylets2[[a]]], {a, 1, arrays}];
arraylets2 = Transpose[arraylets2];
arraylets3 = Transpose[arraylets3];
Do[arraylets3[[a]] = arraylets3[[a]] / Sqrt[Dot[arraylets3[[a]], arraylets3[[a]]], {a, 1, arrays}];
arraylets3 = Transpose[arraylets3];
d1 = Chop[Dot[PseudoInverse[arraylets1], matrix1, Inverse[genelets]]];
d2 = Chop[Dot[PseudoInverse[arraylets2], matrix2, Inverse[genelets]]];
d3 = Chop[Dot[PseudoInverse[arraylets3], matrix3, Inverse[genelets]]];
```

```
(* Create Arraylets Correlations 2 D Red & Green Raster Displays *)
```

```
C1 = Chop[Dot[Transpose[arraylets1], arraylets1], 0.33];
C2 = Chop[Dot[Transpose[arraylets2], arraylets2], 0.33];
C3 = Chop[Dot[Transpose[arraylets3], arraylets3], 0.33];
Ctensor = {C1, C2, C3};

p = Table[0, {5}];
arraynames = Table[a, {a, 1, arrays}];
contrast = 3;
framex = Table[{a - 0.5, ToString[a]}, {a, 1, arrays}];
framey = Table[{a + 1 - 0.5, arrays - a}, {a, 0, arrays - 1}];
ylabels = {"Arraylets", " ", " "};
xlabels = {"(a) S. pombe Arraylets",
           {"(b) S. cerevisiae Arraylets"},
           {"(c) Human Arraylets"}};
```

```

Do[{{
  displaying = Table[
    If[contrast * Ctensor[[n]][[i, j]] > 0,
      If[contrast * Ctensor[[n]][[i, j]] < 1, {contrast * Ctensor[[n]][[i, j]], 0}, {1, 0}],
      If[contrast * Ctensor[[n]][[i, j]] > -1, {0, -contrast * Ctensor[[n]][[i, j]]}, {0, 1}]],
    {i, 1, arrays}, {j, 1, arrays}],
  labelx = ColumnForm[xlabels[[n]], Center],
  labely = ylabels[[n]],
  g = Show[
    Graphics[
      RasterArray[
        Table[
          RGBColor[displaying[[i, j, 1]], displaying[[i, j, 2]], 0],
          {i, arrays, 1, -1}, {j, 1, arrays}]]],
    AspectRatio -> 1,
    Frame -> True,
    FrameTicks -> {None, framey, framex, None},
    FrameLabel -> {None, labely, labelx, None},
    GridLines -> {{{12, {RGBColor[1, 1, 1]}}, {{arrays - 12, {RGBColor[1, 1, 1]}}}},
    DisplayFunction -> Identity],
  g = FullGraphics[g],
  g[[1, 2]] = g[[1, 2]] /.
    Text[labely, {b_, c_}, {1., 0.}] ->
    Text[labely, {b - 2.5, c}, {0, 0}, {0, 1}],
  g[[1, 2]] = g[[1, 2]] /.
    Text[labelx, {b_, c_}, {0., -1.}] ->
    Text[labelx, {b, c + 2}, {0, -1}, {1, 0}],
  g[[1, 2]] = g[[1, 2]] /.
    Text[a_, {b_, c_}, {0., -1.}] ->
    Text[a, {b, c}, {0, -1}, {0, 1}],
  p[[n]] = Show[g,
    AspectRatio -> 1.05,
    PlotRange -> All,
    DisplayFunction -> Identity]],
{n, 1, 3}]

```

(\* Display Arraylets Correlations \*)

```

Show[GraphicsArray[{p[[1]], p[[2]], p[[3]]}],
GraphicsSpacing -> -0.11];

```

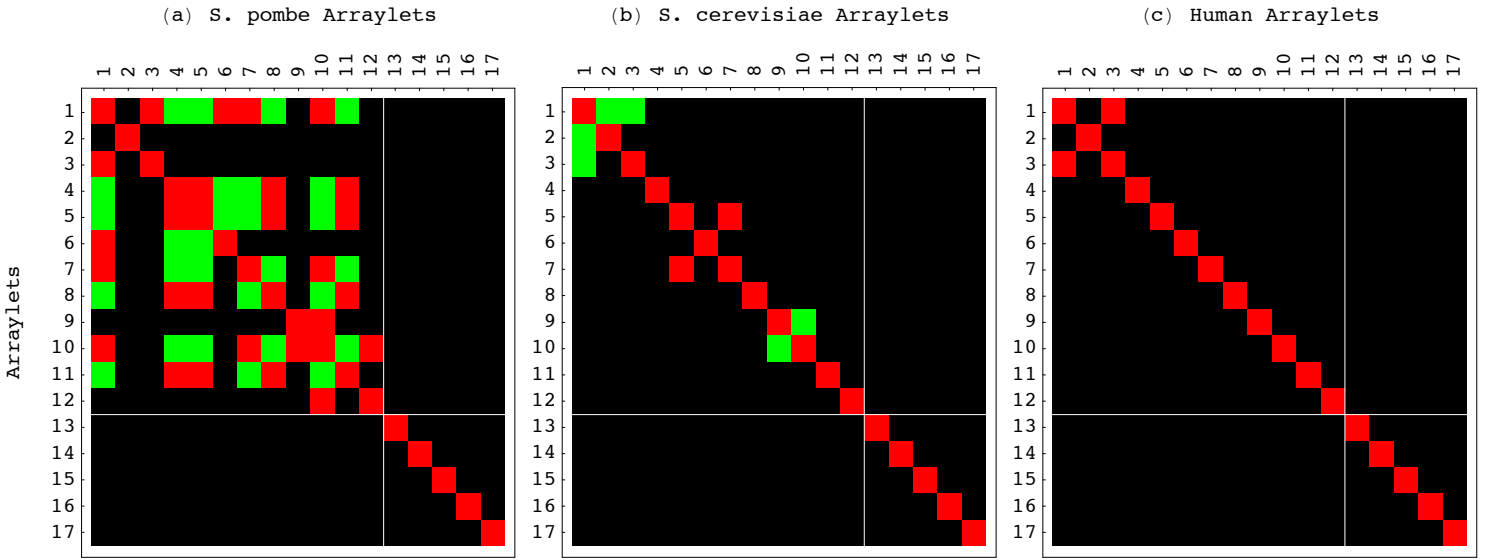



```
(* Create Genelets 2 D Red & Green Raster Display *)
```

```
(* Center Genelets *)
```

```
average = Table[1, {a, 1, arrays}];
average = N[average / Sqrt[Dot[average, average]]];
centergenelets = genelets - N[Outer[Times, Dot[genelets, average], average]];

arraynames = Table[a, {a, 1, arrays}];
contrast = 3;
displaying = Table[
  If[contrast * centergenelets[[i, j]] > 0,
    If[contrast * centergenelets[[i, j]] < 1, {contrast * centergenelets[[i, j]], 0}, {1, 0}],
    If[contrast * centergenelets[[i, j]] > -1, {0, -contrast * centergenelets[[i, j]]}, {0, 1}]],
  {i, 1, arrays}, {j, 1, arrays}];
framex = Table[{a - 0.5, ToString[a]}, {a, 1, arrays}];
framey = Table[{a + 1 - 0.5, arrays - a}, {a, 0, arrays - 1}];
labely = "Genelets";
labelx = ColumnForm[{"(a) Arrays", " "}, Center];
g = Show[
  Graphics[
    RasterArray[
      Table[
        RGBColor[displaying[[i, j, 1]], displaying[[i, j, 2]], 0],
        {i, arrays, 1, -1}, {j, 1, arrays}]]],
  AspectRatio -> 1,
  Frame -> True,
  FrameTicks -> {None, framey, framex, None},
  FrameLabel -> {None, labely, labelx, None},
  DisplayFunction -> Identity];
g = FullGraphics[g];
g[[1, 2]] = g[[1, 2]] /.
  Text[labely, {b_, c_}, {1., 0.}] ->
  Text[labely, {b - 3, c}, {0, 0}, {0, 1}];
g[[1, 2]] = g[[1, 2]] /.
  Text[labelx, {b_, c_}, {0., -1.}] ->
  Text[labelx, {b, c + 2}, {0, -1}, {1, 0}];
g[[1, 2]] = g[[1, 2]] /.
  Text[a_, {b_, c_}, {0., -1.}] ->
  Text[a, {b, c}, {0, -1}, {0, 1}];
g1 = Show[g,
  AspectRatio -> 1.05,
  PlotRange -> All,
  DisplayFunction -> Identity];
```

```
(* Create Fractions Bar Charts Displays *)
```

```
fractions = 1 / values;
Clear[gridx, framex, framey];
gridx = Table[a, {a, 0, limit, N[limit/5]}];
framex = gridx;
framex = Table[{gridx[[a]], framex[[a]]}, {a, 1, 6}];
gridx = Table[{gridx[[a]], RGBColor[0, 0, 0]}, {a, 1, 6}];
framey = Table[{a + 1, arrays - a - 6}, {a, 0, 12 - 3}];
table = Table[fractions[[arrays - a]], {a, 6, arrays - 3}];
gridx = Table[a, {a, 0, 1, 0.2}];
framex = gridx;
framex = Table[{gridx[[a]], framex[[a]]}, {a, 1, 6}];
framex[[6]] = {1, "1"};
gridx = Table[{gridx[[a]], RGBColor[0, 0, 0]}, {a, 1, 6}];
framey = Table[{a + 1, arrays - a}, {a, 0, arrays - 1}];
labelx = ColumnForm[
  {"(b) Inverse Eigenvalues  $\lambda_k^{-1}$ ", StringJoin[" ", " "]},
  Center];
```

```

g = BarChart[
  Table[fractions[[arrays - a]], {a, 0, arrays - 1}],
  BarOrientation -> Horizontal,
  PlotRange -> {{0, 1.0001}, {0.5, arrays + 0.5}},
  AspectRatio -> 1,
  Axes -> False,
  Frame -> True,
  FrameTicks -> {None, framey, framex, None},
  FrameLabel -> {None, None, labelx, None},
  GridLines -> {{gridx[[1]], gridx[[2]], gridx[[3]], gridx[[4]], gridx[[5]],
    {0.5, {RGBColor[0, 0, 0], Dashing[{0.03, 0.02}]}}}, {{0, RGBColor[0, 0, 0]}}},
  DisplayFunction -> Identity];
g = FullGraphics[g];
g[[1, 2]] = g[[1, 2]] /.
  Text[labelx, {b_, c_}, {0., -1.}] ->
  Text[labelx, {b, c + 2}, {0, -1}, {1, 0}];
g[[1, 2]] = g[[1, 2]] /.
  Text[a_, {b_, c_}, {0., -1.}] ->
  Text[a, {b, c}, {0, -1}, {0, 1}];
g2 = Show[g,
  AspectRatio -> 1.35,
  PlotRange -> All,
  DisplayFunction -> Identity];

(* Create Selected Projected Genelets Graph Display *)

{u, w, v} = SingularValueDecomposition[
  {genelets[[13]], genelets[[14]], genelets[[15]], genelets[[16]], genelets[[17]]}];
w[[2, 2]] = 0;
w[[4, 4]] = 0;
w[[5, 5]] = 0;
Pgenelets = Dot[u, w, Transpose[v]];
average = Table[1, {a, 1, arrays}];
average = N[average / Sqrt[Dot[average, average]]];
Pgenelets = Pgenelets - N[Outer[Times, Dot[Pgenelets, average], average]];
Do[Pgenelets[[a]] = Pgenelets[[a]] / Sqrt[Dot[Pgenelets[[a]], Pgenelets[[a]]], {a, 1, 5}]
Pgenelets13 = Sqrt[2 / 17.] * Cos[4 * Pi * t / 17 + 9 * Pi / 16];
Pgenelets14 = Sqrt[2 / 17.] * Cos[4 * Pi * t / 17 - Pi / 2];
Pgenelets15 = Sqrt[2 / 17.] * Cos[4 * Pi * t / 17 - Pi / 4];
Pgenelets16 = Sqrt[2 / 17.] * Cos[4 * Pi * t / 17 + Pi / 2];
Pgenelets17 = Sqrt[2 / 17.] * Cos[4 * Pi * t / 17];

p = Table[0, {5}];
color = {RGBColor[1, 0, 0], RGBColor[0, 0, 1], RGBColor[0, 0.5, 0],
  RGBColor[1, 0.5, 0], RGBColor[0.75, 0, 1]};
fittedPgenelets = {Pgenelets13, Pgenelets14, Pgenelets15, Pgenelets16, Pgenelets17};

texts = {" $\sqrt{\frac{2}{T}} \cos\left(\frac{4\pi t}{T} + \frac{\pi}{4} + \frac{\pi}{16}\right)$ ", " $\sqrt{\frac{2}{T}} \cos\left(\frac{4\pi t}{T} - \frac{\pi}{2}\right)$ ", " $\sqrt{\frac{2}{T}} \cos\left(\frac{4\pi t}{T} - \frac{\pi}{4}\right)$ ",
  " $\sqrt{\frac{2}{T}} \cos\left(\frac{4\pi t}{T} + \frac{\pi}{2}\right)$ ", " $\sqrt{\frac{2}{T}} \cos\left(\frac{4\pi t}{T}\right)$ "};

textpositions = {{6.5, 1.0}, {8.5, -0.675}, {10.5, 0.675}, {8.5, 0.675}, {8.5, -0.675}};
xlabel = {"(c) Arrays", " ", " ", "(d) Arrays", " "};
ylabel = {"Expression Level", {" ", {" ", {" ", {" "}}}};
framex = Table[{a - 1, ToString[a]}, {a, 1, arrays}];
framey = {-1, -0.5, 0, 0.5, 1};
flag = 0;

```

```

Do[{
  graph = Plot[fittedPgenelets[[n]],
    {t, 0, arrays - 1},
    PlotStyle -> {color[[n]], Dashing[{0.03, 0.02}]},
    DisplayFunction -> Identity],
  labelx = ColumnForm[{xlabels[[n]]}, Center],
  labely = ColumnForm[{ylabels[[n]]}, Center],
  coordinates = Table[{a - 1, Pgenelets[[n, a]]}, {a, 1, arrays}],
  points = Table[Point[coordinates[[a]]], {a, 1, arrays}],
  line = Line[coordinates],
  If[n == 4, flag = 0],
  g = Show[{
    Graphics[{color[[n]], PointSize[0.022], points}],
    Graphics[{color[[n]], line}],
    Graphics[{color[[n]], Text[texts[[n]], textpositions[[n]]}],
    graph},
  If[flag == 0,
    {FrameLabel -> {None, labely, labelx, None},
    FrameTicks -> {None, framey, framex, None}},
    {FrameLabel -> {None, labely, labelx, None},
    FrameTicks -> {None, None, None, None}}],
  Frame -> True,
  GridLines -> {None, {{0, RGBColor[0, 0, 0]}}},
  PlotRange -> {-0.85, 1.25},
  DisplayFunction -> Identity],
  g = FullGraphics[g],
  g[[1, 2]] = g[[1, 2]] /. Text[labely, {b_, c_}, {1., 0.}] ->
    Text[labely, {b - 3, c}, {0, 0}, {0, 1}],
  g[[1, 2]] = g[[1, 2]] /. Text[labelx, {b_, c_}, {0., -1.}] ->
    Text[labelx, {b, c + 0.4}, {0, -1}, {1, 0}],
  g[[1, 2]] = g[[1, 2]] /. Text[a_, {b_, c_}, {0., -1.}] ->
    Text[a, {b, c}, {0, -1}, {0, 1}],
  flag = flag + 1,
  p[[n]] = Show[g,
    AspectRatio -> 1.05,
    PlotRange -> All,
    DisplayFunction -> Identity]],
{n, 1, 5}

```

(\* Display Genelets and Selected Genelets \*)

```

g3 = Show[{p[[1]], p[[2]], p[[3]]}, DisplayFunction -> Identity];
g4 = Show[{p[[4]], p[[5]]}, DisplayFunction -> Identity];
Show[GraphicsArray[{g1, g2, g3, g4}], GraphicsSpacing -> -0.095];

```

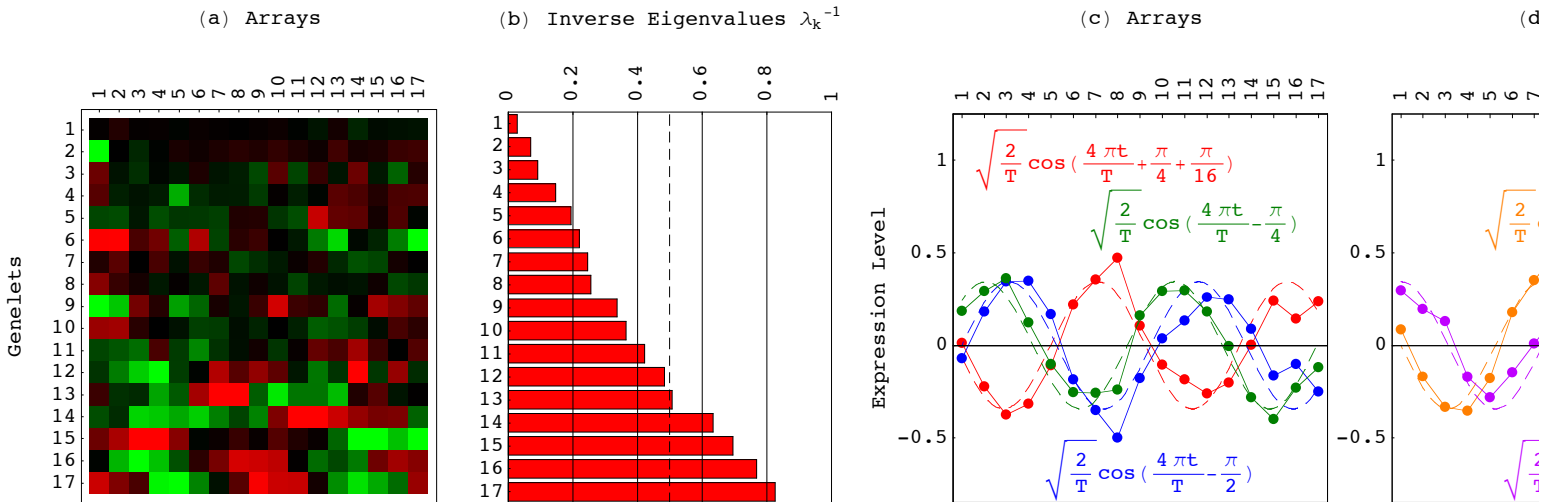

(\* Estimate Significance of Association of Arraylets with the Cell Cycle \*)

(\* Calculate Significance of Cell Cycle Associations in S. pombe \*)

```
cutoff = 100;
genes = genes1;
arraynames = arraynames1;
arraylets = arraylets1;
```

(\* Use Rustici et al. or Oliva et al. Classifications of S. pombe Genes \*)

```
genenames = TakeColumns[genenames1, {4}];
stages = {"M", "G1", "S", "G2", "None"};
numbers = Flatten[Table[{Count[Flatten[genenames], stages[[a]]]}, {a, 1, 5}]];
genelet = {{13}, {14}, {15}, {16}, {17}};
probability = Table[{0}, {a, 13, arrays}];
parallelannotation = Table[{0}, {a, 13, arrays}];
parallelprobability = Table[{0}, {a, 13, arrays}];
antiannotation = Table[{0}, {a, 13, arrays}];
antiprobability = Table[{0}, {a, 13, arrays}];
```

```
Do[{
  arraylet = TakeColumns[Sort[
    AppendRows[TakeColumns[arraylets, genelet[[c]]], genenames],
    OrderedQ[{{#2}, {#1}}] &], {2}],
  table = Table[{
    stages[[a]],
    numbers[[a]],
    Count[Flatten[TakeRows[arraylet, {1, cutoff}]], stages[[a]]],
    {a, 1, 5}],
  probability = Table[{
    Sum[N[Binomial[table[[a, 2]], b] * Binomial[genes - table[[a, 2]], cutoff - b] /
      Binomial[genes, cutoff]], {b, table[[a, 3]], cutoff}],
    stages[[a]]],
    {a, 1, 5}],
  parallelannotation[[c]] = {Sort[probability, OrderedQ[{{#1}, {#2}}] &][[1, 2]]},
  parallelprobability[[c]] = {ScientificForm[Sort[probability, OrderedQ[{{#1}, {#2}}] &][[1, 1], 2]}],
  table = Table[{
    stages[[a]],
    numbers[[a]],
    Count[Flatten[TakeRows[arraylet, {genes - (cutoff - 1), genes}]], stages[[a]]],
    {a, 1, 5}],
  probability = Table[{
    Sum[N[Binomial[table[[a, 2]], b] * Binomial[genes - table[[a, 2]], cutoff - b] /
      Binomial[genes, cutoff]], {b, table[[a, 3]], cutoff}],
    stages[[a]]],
    {a, 1, 5}],
  antiannotation[[c]] = {Sort[probability, OrderedQ[{{#1}, {#2}}] &][[1, 2]]},
  antiprobability[[c]] = {ScientificForm[Sort[probability, OrderedQ[{{#1}, {#2}}] &][[1, 1], 2]}],
  {c, 1, Dimensions[genelet][[1]]}]
```

```
table1 = AppendRows[
  genelet,
  parallelannotation,
  parallelprobability,
  antiannotation,
  antiprobability];
```

(\* Calculate Significance of Cell Cycle Associations in S. cerevisiae \*)

```
genes = genes2;  
arraynames = arraynames2;  
arraylets = arraylets2;
```

(\* Use Spellman et al. Classification of S. cerevisiae Genes \*)

```
genenames = TakeColumns[genenames2, {3}];  
stages = {"M/G1", "G1", "S", "S/G2", "G2/M", "None"};  
numbers = Flatten[Table[{Count[Flatten[genenames], stages[[a]]]}, {a, 1, 6}]];  
genelet = {{13}, {14}, {15}, {16}, {17}};  
probability = Table[{0}, {a, 13, arrays}];  
parallelannotation = Table[{0}, {a, 13, arrays}];  
parallelprobability = Table[{0}, {a, 13, arrays}];  
antiannotation = Table[{0}, {a, 13, arrays}];  
antiprobability = Table[{0}, {a, 13, arrays}];  
  
Do[{  
  arraylet = TakeColumns[Sort[  
    AppendRows[TakeColumns[arraylets, genelet[[c]]], genenames],  
    OrderedQ[{{#2}, {#1}}] &], {2}],  
  table = Table[{  
    stages[[a]],  
    numbers[[a]],  
    Count[Flatten[TakeRows[arraylet, {1, cutoff}]], stages[[a]]],  
    {a, 1, 6}],  
  probability = Table[{  
    Sum[N[Binomial[table[[a, 2]], b] * Binomial[genes - table[[a, 2]], cutoff - b] /  
      Binomial[genes, cutoff]], {b, table[[a, 3]], cutoff}],  
    stages[[a]]],  
    {a, 1, 6}],  
  parallelannotation[[c]] = {Sort[probability, OrderedQ[{{#1}, {#2}}] &][[1, 2]]},  
  parallelprobability[[c]] = {ScientificForm[Sort[probability, OrderedQ[{{#1}, {#2}}] &][[1, 1], 2]}},  
  table = Table[{  
    stages[[a]],  
    numbers[[a]],  
    Count[Flatten[TakeRows[arraylet, {genes - (cutoff - 1), genes}]], stages[[a]]],  
    {a, 1, 6}],  
  probability = Table[{  
    Sum[N[Binomial[table[[a, 2]], b] * Binomial[genes - table[[a, 2]], cutoff - b] /  
      Binomial[genes, cutoff]], {b, table[[a, 3]], cutoff}],  
    stages[[a]]],  
    {a, 1, 6}],  
  antiannotation[[c]] = {Sort[probability, OrderedQ[{{#1}, {#2}}] &][[1, 2]]},  
  antiprobability[[c]] = {ScientificForm[Sort[probability, OrderedQ[{{#1}, {#2}}] &][[1, 1], 2]}},  
  {c, 1, Dimensions[genelet][[1]]}]  
  
table2 = AppendRows[  
  genelet,  
  parallelannotation,  
  parallelprobability,  
  antiannotation,  
  antiprobability];
```

(\* Calculate Significance of Cell Cycle Associations in Human \*)

```
genes = genes3;  
arraynames = arraynames3;  
arraylets = arraylets3;
```

(\* Use Whitfield et al. Classification of Human Genes \*)

```
genenames = TakeColumns[genenames3, {3}];  
stages = {"M/G1", "G1/S", "S", "G2", "G2/M", "None"};  
numbers = Flatten[Table[{Count[Flatten[genenames], stages[[a]]]}, {a, 1, 6}]];  
genelet = {{13}, {14}, {15}, {16}, {17}};  
probability = Table[{0}, {a, 13, arrays}];  
parallelannotation = Table[{0}, {a, 13, arrays}];  
parallelprobability = Table[{0}, {a, 13, arrays}];  
antiannotation = Table[{0}, {a, 13, arrays}];  
antiprobability = Table[{0}, {a, 13, arrays}];  
  
Do[{  
  arraylet = TakeColumns[Sort[  
    AppendRows[TakeColumns[arraylets, genelet[[c]]], genenames],  
    OrderedQ[{{#2}, {#1}}] &], {2}],  
  table = Table[{  
    stages[[a]],  
    numbers[[a]],  
    Count[Flatten[TakeRows[arraylet, {1, cutoff}]], stages[[a]]],  
    {a, 1, 6}],  
  probability = Table[{  
    Sum[N[Binomial[table[[a, 2]], b] * Binomial[genes - table[[a, 2]], cutoff - b] /  
      Binomial[genes, cutoff]], {b, table[[a, 3], cutoff]},  
    stages[[a]]],  
    {a, 1, 6}],  
  parallelannotation[[c]] = {Sort[probability, OrderedQ[{{#1}, {#2}}] &][[1, 2]]},  
  parallelprobability[[c]] = {ScientificForm[Sort[probability, OrderedQ[{{#1}, {#2}}] &][[1, 1], 2]}},  
  table = Table[{  
    stages[[a]],  
    numbers[[a]],  
    Count[Flatten[TakeRows[arraylet, {genes - (cutoff - 1), genes}]], stages[[a]]],  
    {a, 1, 6}],  
  probability = Table[{  
    Sum[N[Binomial[table[[a, 2]], b] * Binomial[genes - table[[a, 2]], cutoff - b] /  
      Binomial[genes, cutoff]], {b, table[[a, 3], cutoff]},  
    stages[[a]]],  
    {a, 1, 6}],  
  antiannotation[[c]] = {Sort[probability, OrderedQ[{{#1}, {#2}}] &][[1, 2]]},  
  antiprobability[[c]] = {ScientificForm[Sort[probability, OrderedQ[{{#1}, {#2}}] &][[1, 1], 2]}},  
  {c, 1, Dimensions[genelet][[1]]}]  
  
table3 = AppendRows[  
  genelet,  
  parallelannotation,  
  parallelprobability,  
  antiannotation,  
  antiprobability];
```

(\* Display Significance of Association of Arraylets with the Cell Cycle \*)

```

headerx = {{
  ColumnForm[{" ", "Dataset"}, Left],
  ColumnForm[{" ", "Arraylet"}, Left],
  ColumnForm[{"Overexpression", "Annotation"}, Left],
  ColumnForm[{"Overexpression", "P-Value"}, Left],
  ColumnForm[{"Underexpression", "Annotation"}, Left],
  ColumnForm[{"Underexpression", "P-Value"}, Left]},
{" ", " ", " ", " ", " ", " ", " ", " "}};
spacerx = {" ", " ", " ", " ", " "};
headery = Table[" ", {a, 1, 17}, {b, 1, 1}];
headery[[1]] = {"S. pombe"};
headery[[7]] = {"S. cerevisiae"};
headery[[13]] = {"Human"};
association =
  AppendColumns[headerx,
  AppendRows[headery,
  AppendColumns[table1, spacerx, table2, spacerx, table3]]];
TableForm[association, TableSpacing -> {1, 1}]

```

| Dataset       | Arraylet | Overexpression<br>Annotation | Overexpression<br>P-Value | Underexpression<br>Annotation | Underexpression<br>P-Value |
|---------------|----------|------------------------------|---------------------------|-------------------------------|----------------------------|
| S. pombe      | 13       | G2                           | $2.4 \times 10^{-10}$     | G1                            | $1. \times 10^{-15}$       |
|               | 14       | M                            | $2.2 \times 10^{-21}$     | G2                            | $1.3 \times 10^{-9}$       |
|               | 15       | M                            | $4.1 \times 10^{-13}$     | S                             | $1.6 \times 10^{-17}$      |
|               | 16       | G2                           | $5.2 \times 10^{-18}$     | G1                            | $1.2 \times 10^{-26}$      |
|               | 17       | G2                           | $2.4 \times 10^{-10}$     | S                             | $5.3 \times 10^{-35}$      |
| S. cerevisiae | 13       | S/G2                         | $4.3 \times 10^{-15}$     | M/G1                          | $1.4 \times 10^{-9}$       |
|               | 14       | M/G1                         | $4.9 \times 10^{-26}$     | G2/M                          | $2.2 \times 10^{-12}$      |
|               | 15       | G1                           | $7.7 \times 10^{-17}$     | S                             | $1.3 \times 10^{-8}$       |
|               | 16       | G2/M                         | $2.3 \times 10^{-38}$     | G1                            | $2. \times 10^{-32}$       |
|               | 17       | G2/M                         | $2.3 \times 10^{-41}$     | G1                            | $2.6 \times 10^{-40}$      |
| Human         | 13       | G1/S                         | $1.1 \times 10^{-33}$     | G2                            | $2.4 \times 10^{-44}$      |
|               | 14       | M/G1                         | $5.7 \times 10^{-3}$      | G2                            | $4.7 \times 10^{-2}$       |
|               | 15       | G2                           | $9.8 \times 10^{-24}$     | None                          | $1.4 \times 10^{-1}$       |
|               | 16       | G1/S                         | $9.8 \times 10^{-13}$     | G2                            | $4.1 \times 10^{-4}$       |
|               | 17       | G2                           | $9.3 \times 10^{-33}$     | M/G1                          | $2.7 \times 10^{-2}$       |

```
(* Sort S. pombe, S. cerevisiae and Human Data in 5 D Common Cell Cycle Subspace *)
```

```
(* Least-Squares Approximate 5 D Subspace of Genelets with 2 D Subspace Using SVD *)
```

```
{u, w, v} = SingularValues[  
  {genelets[[13]], genelets[[14]], genelets[[15]], genelets[[16]], genelets[[17]]};  
v[[3]] = -v[[3]];
```

```
(* Define 2 D Subspace {x,y} ≡ {v[[3]],v[[1]]} *)
```

```
x = v[[3]];  
y = v[[1]];
```

```
(* Create v[[1]], v[[2]] and v[[3]] Graph Displays *)
```

```
average = Table[1, {a, 1, arrays}];  
average = N[average / Sqrt[Dot[average, average]]];  
v = v - N[Outer[Times, Dot[v, average], average]]];  
  
v1 = Sqrt[2 / 17.] * Cos[4 * Pi * t / 17 - Pi / 2];  
v2 = Sqrt[2 / 17.] * Cos[2 * Pi * t / 17 - Pi / 3];  
v3 = Sqrt[2 / 17.] * Cos[4 * Pi * t / 17];  
  
p = Table[0, {3}];  
color = {RGBColor[1, 0, 0], RGBColor[0, 0, 1], RGBColor[0, 0.5, 0]};  
fittedv = {v1, v2, v3};  
  
texts = {" $\sqrt{\frac{2}{T}} \cos\left(\frac{4\pi t}{T} - \frac{\pi}{2}\right)$ ", " $\sqrt{\frac{2}{T}} \cos\left(\frac{2\pi t}{T} - \frac{\pi}{3}\right)$ ", " $\sqrt{\frac{2}{T}} \cos\left(\frac{4\pi t}{T}\right)$ ";  
textpositions = {{6.5, 1.0}, {8.5, -0.675}, {10.5, 0.675}};  
framex = Table[{a - 1, ToString[a]}, {a, 1, arrays}];  
framey = {-1, -0.5, 0, 0.5, 1};  
labelx = ColumnForm[{"Arrays"}, Center];  
labely = ColumnForm[{" ", "Expression Level"}, Center];  
flag = 0;
```



```

Do[{
  graph = Plot[fittedv[[n]],
    {t, 0, arrays - 1},
    PlotStyle -> {color[[n]], Dashing[{0.03, 0.02}]},
    DisplayFunction -> Identity],
  coordinates = Table[{a - 1, v[[n, a]]}, {a, 1, arrays}],
  points = Table[Point[coordinates[[a]]], {a, 1, arrays}],
  line = Line[coordinates],
  g = Show[{
    Graphics[{color[[n]], PointSize[0.022], points}],
    Graphics[{color[[n]], line}],
    Graphics[{color[[n]], Text[texts[[n]], textpositions[[n]]}],
    graph},
  If[flag == 0,
    {FrameLabel -> {None, labely, labelx, None},
    FrameTicks -> {None, framey, framex, None}},
    {FrameLabel -> {None, None, None, None},
    FrameTicks -> {None, None, None, None}},
  Frame -> True,
  GridLines -> {None, {{0, RGBColor[0, 0, 0]}}},
  PlotRange -> {-0.85, 1.25},
  DisplayFunction -> Identity],
  g = FullGraphics[g],
  g[[1, 2]] = g[[1, 2]] /.
  Text[labely, {b_, c_}, {1., 0.}] ->
  Text[labely, {b - 3, c}, {0, 0}, {0, 1}],
  g[[1, 2]] = g[[1, 2]] /.
  Text[labelx, {b_, c_}, {0., -1.}] ->
  Text[labelx, {b, c + 0.225}, {0, -1}, {1, 0}],
  g[[1, 2]] = g[[1, 2]] /.
  Text[a_, {b_, c_}, {0., -1.}] ->
  Text[a, {b, c}, {0, -1}, {0, 1}],
  flag = flag + 1,
  p[[n]] = Show[g,
  AspectRatio -> 0.95,
  PlotRange -> All,
  DisplayFunction -> Identity]],
{n, 1, 3}]

```

(\* Display v[[1]], v[[2]] and v[[3]] \*)

```

g = Show[{p[[3]], p[[2]], p[[1]]},
  DisplayFunction -> $DisplayFunction];

```

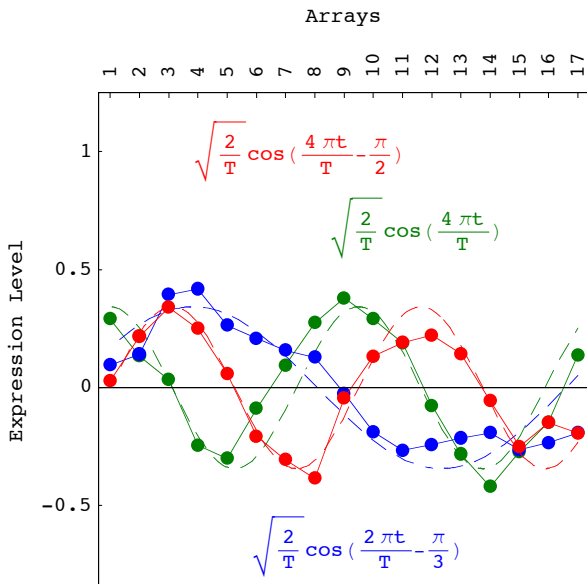

```
(* Calculate Amplitudes of the Projections of the Genelets *)
```

```
a13 = Sqrt[Dot[genelets[[13]], x]^2 + Dot[genelets[[13]], y]^2];  
a14 = Sqrt[Dot[genelets[[14]], x]^2 + Dot[genelets[[14]], y]^2];  
a15 = Sqrt[Dot[genelets[[15]], x]^2 + Dot[genelets[[15]], y]^2];  
a16 = Sqrt[Dot[genelets[[16]], x]^2 + Dot[genelets[[16]], y]^2];  
a17 = Sqrt[Dot[genelets[[17]], x]^2 + Dot[genelets[[17]], y]^2];
```

```
(* Calculate Angular Directions of the Projections of Genelets *)
```

```
c13 = ArcTan[Dot[genelets[[13]], x], Dot[genelets[[13]], y]];  
c14 = ArcTan[Dot[genelets[[14]], x], Dot[genelets[[14]], y]];  
c15 = ArcTan[Dot[genelets[[15]], x], Dot[genelets[[15]], y]];  
c16 = ArcTan[Dot[genelets[[16]], x], Dot[genelets[[16]], y]];  
c17 = ArcTan[Dot[genelets[[17]], x], Dot[genelets[[17]], y]]];
```

```
c1314 = 2 * Abs[Cos[c13 - c14]];  
c1315 = 2 * Abs[Cos[c13 - c15]];  
c1316 = 2 * Abs[Cos[c13 - c16]];  
c1317 = 2 * Abs[Cos[c13 - c17]];  
c1415 = 2 * Abs[Cos[c14 - c15]];  
c1416 = 2 * Abs[Cos[c14 - c16]];  
c1417 = 2 * Abs[Cos[c14 - c17]];  
c1516 = 2 * Abs[Cos[c15 - c16]];  
c1517 = 2 * Abs[Cos[c15 - c17]];  
c1617 = 2 * Abs[Cos[c16 - c17]]];
```

```
(* Sort S. pombe Data *)
```

```
genes = genes1;  
arraynames = arraynames1;  
genenames = genenames1;
```

```
(* Sort S. pombe Arrays *)
```

```
(* Center Genelets and Calculate Contributions of Arraylets to Arrays *)
```

```
average = Table[1, {a, 1, arrays}];  
average = N[average / Sqrt[Dot[average, average]]];  
  
arraycontributions13 =  
  (genelets[[13]] - N[Outer[Times, Dot[genelets, average], average]][[13]]) * d1[[13, 13]];  
arraycontributions14 =  
  (genelets[[14]] - N[Outer[Times, Dot[genelets, average], average]][[14]]) * d1[[14, 14]];  
arraycontributions15 =  
  (genelets[[15]] - N[Outer[Times, Dot[genelets, average], average]][[15]]) * d1[[15, 15]];  
arraycontributions16 =  
  (genelets[[16]] - N[Outer[Times, Dot[genelets, average], average]][[16]]) * d1[[16, 16]];  
arraycontributions17 =  
  (genelets[[17]] - N[Outer[Times, Dot[genelets, average], average]][[17]]) * d1[[17, 17]]];
```

(\* Project Arrays from 5D Arraylets Subspace Onto 2D Subspace \*)

```
coordinates = Table[{
  (Dot[genelets[[13]], x] * arraycontributions13[[a]] +
   Dot[genelets[[14]], x] * arraycontributions14[[a]] +
   Dot[genelets[[15]], x] * arraycontributions15[[a]] +
   Dot[genelets[[16]], x] * arraycontributions16[[a]] +
   Dot[genelets[[17]], x] * arraycontributions17[[a]]) /
  Sqrt[(a13 * arraycontributions13[[a]])^2 + (a14 * arraycontributions14[[a]])^2 +
        (a15 * arraycontributions15[[a]])^2 + (a16 * arraycontributions16[[a]])^2 +
        (a17 * arraycontributions17[[a]])^2 +
        c1314 * Abs[(a13 * arraycontributions13[[a]]) * (a14 * arraycontributions14[[a]])] +
        c1315 * Abs[(a13 * arraycontributions13[[a]]) * (a15 * arraycontributions15[[a]])] +
        c1316 * Abs[(a13 * arraycontributions13[[a]]) * (a16 * arraycontributions16[[a]])] +
        c1317 * Abs[(a13 * arraycontributions13[[a]]) * (a17 * arraycontributions17[[a]])] +
        c1415 * Abs[(a14 * arraycontributions14[[a]]) * (a15 * arraycontributions15[[a]])] +
        c1416 * Abs[(a14 * arraycontributions14[[a]]) * (a16 * arraycontributions16[[a]])] +
        c1417 * Abs[(a14 * arraycontributions14[[a]]) * (a17 * arraycontributions17[[a]])] +
        c1516 * Abs[(a15 * arraycontributions15[[a]]) * (a16 * arraycontributions16[[a]])] +
        c1517 * Abs[(a15 * arraycontributions15[[a]]) * (a17 * arraycontributions17[[a]])] +
        c1617 * Abs[(a16 * arraycontributions16[[a]]) * (a17 * arraycontributions17[[a]])]),
  (Dot[genelets[[13]], y] * arraycontributions13[[a]] +
   Dot[genelets[[14]], y] * arraycontributions14[[a]] +
   Dot[genelets[[15]], y] * arraycontributions15[[a]] +
   Dot[genelets[[16]], y] * arraycontributions16[[a]] +
   Dot[genelets[[17]], y] * arraycontributions17[[a]]) /
  Sqrt[(a13 * arraycontributions13[[a]])^2 + (a14 * arraycontributions14[[a]])^2 +
        (a15 * arraycontributions15[[a]])^2 + (a16 * arraycontributions16[[a]])^2 +
        (a17 * arraycontributions17[[a]])^2 +
        c1314 * Abs[(a13 * arraycontributions13[[a]]) * (a14 * arraycontributions14[[a]])] +
        c1315 * Abs[(a13 * arraycontributions13[[a]]) * (a15 * arraycontributions15[[a]])] +
        c1316 * Abs[(a13 * arraycontributions13[[a]]) * (a16 * arraycontributions16[[a]])] +
        c1317 * Abs[(a13 * arraycontributions13[[a]]) * (a17 * arraycontributions17[[a]])] +
        c1415 * Abs[(a14 * arraycontributions14[[a]]) * (a15 * arraycontributions15[[a]])] +
        c1416 * Abs[(a14 * arraycontributions14[[a]]) * (a16 * arraycontributions16[[a]])] +
        c1417 * Abs[(a14 * arraycontributions14[[a]]) * (a17 * arraycontributions17[[a]])] +
        c1516 * Abs[(a15 * arraycontributions15[[a]]) * (a16 * arraycontributions16[[a]])] +
        c1517 * Abs[(a15 * arraycontributions15[[a]]) * (a17 * arraycontributions17[[a]])] +
        c1617 * Abs[(a16 * arraycontributions16[[a]]) * (a17 * arraycontributions17[[a]])]),
  {a, 1, arrays}];
```

(\* Create Parametric Plot of S. pombe Arrays Projected Onto 2D Subspace \*)

```
Clear[points];
points1 = {Point[coordinates[[7]]], Point[coordinates[[8]]], Point[coordinates[[9]]],
  Point[coordinates[[10]]], Point[coordinates[[16]]], Point[coordinates[[17]]]};
points2 = {Point[coordinates[[2]]], Point[coordinates[[11]]]};
points3 = {Point[coordinates[[1]]], Point[coordinates[[3]]], Point[coordinates[[4]]],
  Point[coordinates[[5]]], Point[coordinates[[12]]], Point[coordinates[[13]]]};
points4 = {Point[coordinates[[6]]], Point[coordinates[[14]]], Point[coordinates[[15]]]};
textcoordinates = coordinates;
Do[
  textcoordinates[[a, 1]] = If[
    textcoordinates[[a, 1]] > 0,
    textcoordinates[[a, 1]] + 0.095,
    textcoordinates[[a, 1]] - 0.1,
  {a, 1, 9}];
Do[
  textcoordinates[[a, 1]] =
  If[textcoordinates[[a, 1]] > 0,
    textcoordinates[[a, 1]] + 0.11,
    textcoordinates[[a, 1]] - 0.12,
  {a, 10, arrays}];
```

```

textcoordinates[[1]] = textcoordinates[[1]] - {0.18, 0};
textcoordinates[[6]] = textcoordinates[[6]] + {0.2, 0};
textcoordinates[[11]] = textcoordinates[[11]] - {0.22, 0};
textcoordinates[[12]] = textcoordinates[[12]] + {0.12, -0.12};
textcoordinates[[15]] = textcoordinates[[15]] + {0, 0.05};
textcoordinates[[16]] = textcoordinates[[16]] + {0.24, 0};
textcoordinates[[17]] = textcoordinates[[17]] + {0, 0.1};

texts = Table[Text[a, textcoordinates[[a]], {a, 1, arrays}];
radius = Sqrt[coordinates[[2, 1]]^2 + coordinates[[2, 2]]^2];
p = Show[
  Graphics[{RGBColor[0, 0, 0], Text["(a)", {-1.22, 1.15}, {-1, 0}]}],
  Graphics[{RGBColor[0, 0, 0], Text["x", {1.22, -0.075}, {1, 0}]}],
  Graphics[{RGBColor[0, 0, 0], Text["y", {-0.065, 1.22}, {0, 1}]}],
  Graphics[{RGBColor[1, 0, 0], Text["G2", {1.01, -0.54}]}],
  Graphics[{RGBColor[0, 0, 0], Text["M", {0.25, 1.07}]}],
  Graphics[{RGBColor[0, 0.5, 0], Text["G1", {-1, 0.525}]}],
  Graphics[{RGBColor[0, 0, 1], Text["S", {-0.878, -0.71}]}],
  Graphics[{RGBColor[1, 0, 0], PointSize[0.035], points1}],
  Graphics[{RGBColor[1, 1, 0], PointSize[0.035], points2}],
  Graphics[{RGBColor[0, 0.5, 0], PointSize[0.035], points3}],
  Graphics[{RGBColor[0, 0, 1], PointSize[0.035], points4}],
  Graphics[{RGBColor[0, 0, 0], Text["u1,17", {1.235, 0.5}, {1, 0}]}],
  Graphics[{RGBColor[0, 0, 0], Text["u1,16", {0.5, -1.12}, {-1, 0}]}],
  Graphics[{RGBColor[0, 0, 0], Text["u1,15", {0.7, 1.12}, {-1, 0}]}],
  Graphics[{RGBColor[0, 0, 0], Text["u1,14", {-0.45, 1.12}, {1, 0}]}],
  Graphics[{RGBColor[0, 0, 0], Text["u1,13", {-0.025, -1.12}, {1, 0}]}],
  Graphics[texts],
  Graphics[{RGBColor[0, 0, 0], Dashing[{0.03, 0.02}], Circle[{0, 0}, 0.5]}],
  Graphics[{RGBColor[0, 0, 0], Dashing[{0.03, 0.02}], Circle[{0, 0}, 1]}],
  Graphics[{RGBColor[0, 0, 0], Dashing[{0.03, 0.02}], Line[{0, 1.25}, {0, -1.25}]}],
  Graphics[{RGBColor[0, 0, 0], Dashing[{0.03, 0.02}], Line[{1.25, 0}, {-1.25, 0}]}],
  Graphics[{RGBColor[0, 0, 0], Arrow[{1.25 / Tan[c13], 1.25}, {-1.25 / Tan[c13], -1.25},
    HeadCenter -> 0.5, HeadLength -> 0.035, HeadWidth -> 0.75]}],
  Graphics[{RGBColor[0, 0, 0], Arrow[{-1.25 / Tan[c14 - Pi], -1.25}, {1.25 / Tan[c14 - Pi], 1.25},
    HeadCenter -> 0.5, HeadLength -> 0.035, HeadWidth -> 0.75]}],
  Graphics[{RGBColor[0, 0, 0], Arrow[{-1.25 / Tan[c15], -1.25}, {1.25 / Tan[c15], 1.25},
    HeadCenter -> 0.5, HeadLength -> 0.035, HeadWidth -> 0.75]}],
  Graphics[{RGBColor[0, 0, 0], Arrow[{1.25 / Tan[c16], 1.25}, {-1.25 / Tan[c16], -1.25},
    HeadCenter -> 0.5, HeadLength -> 0.035, HeadWidth -> 0.75]}],
  Graphics[{RGBColor[0, 0, 0], Arrow[{-1.25, -1.25 * Tan[c17]}, {1.25, 1.25 * Tan[c17]},
    HeadCenter -> 0.5, HeadLength -> 0.035, HeadWidth -> 0.75}]}],
  AspectRatio -> 1,
  PlotRange -> {{-1.25, 1.25}, {-1.25, 1.25}},
  Frame -> True,
  FrameTicks -> False,
  FrameLabel -> {None, None, None, None},
  GridLines -> {None, None},
  DisplayFunction -> Identity];

p = FullGraphics[p];
p[[1, 2]] = p[[1, 2]] /.
  Text[labely, {b_, c_}, {1., 0.}] ->
  Text[labely, {-1.18, 0}, {0, 0}, {0, 1}];
g1 = Show[p,
  AspectRatio -> 1,
  PlotRange -> All,
  DisplayFunction -> Identity];

```

```
(* Sort S. pombe Genes *)
```

```
(* Center Arraylets and Calculate Contributions of Genelets to Genes *)
```

```
centerarraylets = Transpose[arraylets1];  
average = Table[1, {a, 1, genes}];  
average = N[average / Sqrt[Dot[average, average]]];  
centerarraylets = centerarraylets - N[Outer[Times, Dot[centerarraylets, average], average]];  
centerarraylets = Transpose[centerarraylets];  
genecontributions = Transpose[Dot[centerarraylets, d1]];
```

```
(* Project Genes from 5 D Genelets Subspace Onto 2 D Subspace *)
```

```
coordinates = Table[{  
  (Dot[genelets[[13]], x] * genecontributions[[13, a]] +  
    Dot[genelets[[14]], x] * genecontributions[[14, a]] +  
    Dot[genelets[[15]], x] * genecontributions[[15, a]] +  
    Dot[genelets[[16]], x] * genecontributions[[16, a]] +  
    Dot[genelets[[17]], x] * genecontributions[[17, a]]) /  
  Sqrt[(a13 * genecontributions[[13, a]])^2 + (a14 * genecontributions[[14, a]])^2 +  
    (a15 * genecontributions[[15, a]])^2 + (a16 * genecontributions[[16, a]])^2 +  
    (a17 * genecontributions[[17, a]])^2 +  
    c1314 * Abs[(a13 * genecontributions[[13, a]]) * (a14 * genecontributions[[14, a]])] +  
    c1315 * Abs[(a13 * genecontributions[[13, a]]) * (a15 * genecontributions[[15, a]])] +  
    c1316 * Abs[(a13 * genecontributions[[13, a]]) * (a16 * genecontributions[[16, a]])] +  
    c1317 * Abs[(a13 * genecontributions[[13, a]]) * (a17 * genecontributions[[17, a]])] +  
    c1415 * Abs[(a14 * genecontributions[[14, a]]) * (a15 * genecontributions[[15, a]])] +  
    c1416 * Abs[(a14 * genecontributions[[14, a]]) * (a16 * genecontributions[[16, a]])] +  
    c1417 * Abs[(a14 * genecontributions[[14, a]]) * (a17 * genecontributions[[17, a]])] +  
    c1516 * Abs[(a15 * genecontributions[[15, a]]) * (a16 * genecontributions[[16, a]])] +  
    c1517 * Abs[(a15 * genecontributions[[15, a]]) * (a17 * genecontributions[[17, a]])] +  
    c1617 * Abs[(a16 * genecontributions[[16, a]]) * (a17 * genecontributions[[17, a]])],  
  (Dot[genelets[[13]], y] * genecontributions[[13, a]] +  
    Dot[genelets[[14]], y] * genecontributions[[14, a]] +  
    Dot[genelets[[15]], y] * genecontributions[[15, a]] +  
    Dot[genelets[[16]], y] * genecontributions[[16, a]] +  
    Dot[genelets[[17]], y] * genecontributions[[17, a]]) /  
  Sqrt[(a13 * genecontributions[[13, a]])^2 + (a14 * genecontributions[[14, a]])^2 +  
    (a15 * genecontributions[[15, a]])^2 + (a16 * genecontributions[[16, a]])^2 +  
    (a17 * genecontributions[[17, a]])^2 +  
    c1314 * Abs[(a13 * genecontributions[[13, a]]) * (a14 * genecontributions[[14, a]])] +  
    c1315 * Abs[(a13 * genecontributions[[13, a]]) * (a15 * genecontributions[[15, a]])] +  
    c1316 * Abs[(a13 * genecontributions[[13, a]]) * (a16 * genecontributions[[16, a]])] +  
    c1317 * Abs[(a13 * genecontributions[[13, a]]) * (a17 * genecontributions[[17, a]])] +  
    c1415 * Abs[(a14 * genecontributions[[14, a]]) * (a15 * genecontributions[[15, a]])] +  
    c1416 * Abs[(a14 * genecontributions[[14, a]]) * (a16 * genecontributions[[16, a]])] +  
    c1417 * Abs[(a14 * genecontributions[[14, a]]) * (a17 * genecontributions[[17, a]])] +  
    c1516 * Abs[(a15 * genecontributions[[15, a]]) * (a16 * genecontributions[[16, a]])] +  
    c1517 * Abs[(a15 * genecontributions[[15, a]]) * (a17 * genecontributions[[17, a]])] +  
    c1617 * Abs[(a16 * genecontributions[[16, a]]) * (a17 * genecontributions[[17, a]])],  
  {a, 1, genes}];
```

```
(* Create Parametric Plot of S. pombe Cell Cycle Genes Projected Onto 2 D Subspace *)
```

```
list = AppendRows[TakeColumns[genenames, {1, 1}], TakeColumns[genenames, {4, 4}]];  
stages = {"G2", "M", "G1", "S"};  
points = {points1, points2, points3, points4};  
radii = {radii1, radii2, radii3, radii4};
```

```

Do[{{
  position = Position[list, stages[[b]],
  points[[b]] = Table[Point[coordinates[[position[[a]][[1]]]], {a, 1, Dimensions[position][[1]]}],
  radii[[b]] =
    Table[Sqrt[coordinates[[position[[a]][[1]]][[1]]^2 + coordinates[[position[[a]][[1]]][[2]]^2],
      {a, 1, Dimensions[position][[1]]}],
  {b, 1, Dimensions[stages][[1]]}]
radii = Sort[Flatten[radii]];
N[Round[radii[[37]] * 100 / 100]
N[Round[radii[[38]] * 100 / 100]

0.49

0.5

p = Show[{{
  Graphics[{{RGBColor[0, 0, 0], Text["(d)", {-1.22, 1.15}, {-1, 0}}]},
  Graphics[{{RGBColor[0, 0, 0], Text["x", {1.22, -0.075}, {1, 0}}]},
  Graphics[{{RGBColor[0, 0, 0], Text["y", {-0.065, 1.22}, {0, 1}}]},
  Graphics[{{RGBColor[1, 0, 0], Text["G2", {1.01, -0.54}}]},
  Graphics[{{RGBColor[0, 0, 0], Text["M", {0.25, 1.07}}]},
  Graphics[{{RGBColor[0, 0.5, 0], Text["G1", {-1, 0.525}}]},
  Graphics[{{RGBColor[0, 0, 1], Text["S", {-0.878, -0.71}}]},
  Graphics[{{RGBColor[1, 0, 0], PointSize[0.02], points[[1]]}},
  Graphics[{{RGBColor[1, 1, 0], PointSize[0.02], points[[2]]}},
  Graphics[{{RGBColor[0, 0, 1], PointSize[0.02], points[[4]]}},
  Graphics[{{RGBColor[0, 0.5, 0], PointSize[0.02], points[[3]]}},
  Graphics[{{RGBColor[0, 0, 0], Text["v17", {1.235, 0.5}, {1, 0}}]},
  Graphics[{{RGBColor[0, 0, 0], Text["v16", {0.5, -1.12}, {-1, 0}}]},
  Graphics[{{RGBColor[0, 0, 0], Text["v15", {0.7, 1.12}, {-1, 0}}]},
  Graphics[{{RGBColor[0, 0, 0], Text["v14", {-0.45, 1.12}, {1, 0}}]},
  Graphics[{{RGBColor[0, 0, 0], Text["v13", {-0.025, -1.12}, {1, 0}}]},
  Graphics[{{RGBColor[0, 0, 0], Dashing[{0.03, 0.02}], Circle[{0, 0}, 0.5, {0 * Pi, 2 * Pi}}]},
  Graphics[{{RGBColor[0, 0, 0], Dashing[{0.03, 0.02}], Circle[{0, 0}, 1]}]},
  Graphics[{{RGBColor[0, 0, 0], Dashing[{0.03, 0.02}], Line[{{0, 1.25}, {0, -1.25}}]}]},
  Graphics[{{RGBColor[0, 0, 0], Dashing[{0.03, 0.02}], Line[{{1.25, 0}, {-1.25, 0}}]}]},
  Graphics[{{RGBColor[0, 0, 0], Arrow[{1.25 / Tan[c13], 1.25}, {-1.25 / Tan[c13], -1.25},
    HeadCenter -> 0.5, HeadLength -> 0.035, HeadWidth -> 0.75]}]},
  Graphics[{{RGBColor[0, 0, 0], Arrow[{-1.25 / Tan[c14 - Pi], -1.25}, {1.25 / Tan[c14 - Pi], 1.25},
    HeadCenter -> 0.5, HeadLength -> 0.035, HeadWidth -> 0.75]}]},
  Graphics[{{RGBColor[0, 0, 0], Arrow[{-1.25 / Tan[c15], -1.25}, {1.25 / Tan[c15], 1.25},
    HeadCenter -> 0.5, HeadLength -> 0.035, HeadWidth -> 0.75]}]},
  Graphics[{{RGBColor[0, 0, 0], Arrow[{1.25 / Tan[c16], 1.25}, {-1.25 / Tan[c16], -1.25},
    HeadCenter -> 0.5, HeadLength -> 0.035, HeadWidth -> 0.75]}]},
  Graphics[{{RGBColor[0, 0, 0], Arrow[{-1.25, -1.25 * Tan[c17]}, {1.25, 1.25 * Tan[c17]},
    HeadCenter -> 0.5, HeadLength -> 0.035, HeadWidth -> 0.75]}]},
  AspectRatio -> 1,
  PlotRange -> {{-1.25, 1.25}, {-1.25, 1.25}},
  Frame -> True,
  FrameTicks -> False,
  FrameLabel -> {None, None, None, None},
  GridLines -> {None, None},
  DisplayFunction -> Identity];
p = FullGraphics[p];
p[[1, 2]] = p[[1, 2]] /.
  Text[labely, {b_, c_}, {1., 0.}] ->
  Text[labely, {-1.18, 0}, {0, 0}, {0, 1}];
g2 = Show[p,
  AspectRatio -> 1,
  PlotRange -> All,
  DisplayFunction -> Identity];

```

```

R[theta_] = {{Cos[theta], Sin[theta]}, {-Sin[theta], Cos[theta]}};
z = Transpose[{{0.4, 0}, {1.1, 0}, {0.75, 0.25}}];
polypoints[theta_] = Transpose[Dot[R[theta], z]];
p = Show[
  Graphics[{{RGBColor[0, 0, 0], Text["(g)", {-1.22, 1.15}, {-1, 0}]}}],
  Graphics[{{RGBColor[0, 0, 0], Text["x", {1.22, -0.075}, {1, 0}]}}],
  Graphics[{{RGBColor[0, 0, 0], Text["y", {-0.065, 1.22}, {0, 1}]}}],
  Graphics[{{RGBColor[1, 0, 0], Text["G2", {1.01, -0.54}]}}],
  Graphics[{{RGBColor[0, 0, 0], Text["M", {0.25, 1.07}]}}],
  Graphics[{{RGBColor[0, 0.5, 0], Text["G1", {-1, 0.525}]}}],
  Graphics[{{RGBColor[0, 0, 1], Text["S", {-0.878, -0.71}]}}],
  Graphics[{{RGBColor[0, 0, 0], Text["17", {1.235, 0.5}, {1, 0}]}}],
  Graphics[{{RGBColor[0, 0, 0], Text["16", {0.5, -1.12}, {-1, 0}]}}],
  Graphics[{{RGBColor[0, 0, 0], Text["15", {0.7, 1.12}, {-1, 0}]}}],
  Graphics[{{RGBColor[0, 0, 0], Text["14", {-0.45, 1.12}, {1, 0}]}}],
  Graphics[{{RGBColor[0, 0, 0], Text["13", {-0.025, -1.12}, {1, 0}]}}],
  Graphics[{{RGBColor[1, 0, 0], Disk[{0, 0}, 1, {0, c15}]}},
  Graphics[{{RGBColor[1, 0, 0], Disk[{0, 0}, 1, {c15 + Pi, 2 * Pi}]}},
  Graphics[{{RGBColor[1, 1, 0], Disk[{0, 0}, 1, {c15, c14}]}},
  Graphics[{{RGBColor[0, 0.5, 0], Disk[{0, 0}, 1, {c14, Pi + c17}]}},
  Graphics[{{RGBColor[0, 0, 1], Disk[{0, 0}, 1, {Pi + c17, c15 + Pi}]}},
  Graphics[{{RGBColor[1, 1, 1], Disk[{0, 0}, 0.5]}},
  Graphics[{{RGBColor[1, 0, 0], Polygon[polypoints[2 * Pi - c15]}},
  Graphics[{{RGBColor[1, 1, 0], Polygon[polypoints[2 * Pi - c14]}},
  Graphics[{{RGBColor[0, 0.5, 0], Polygon[polypoints[Pi - c17]}},
  Graphics[{{RGBColor[0, 0, 1], Polygon[polypoints[Pi - c15]}},
  Graphics[{{RGBColor[0, 0, 0], Dashing[{0.03, 0.02}], Line[{{0, 1.25}, {0, -1.25}]}},
  Graphics[{{RGBColor[0, 0, 0], Dashing[{0.03, 0.02}], Line[{{1.25, 0}, {-1.25, 0}]}},
  Graphics[{{RGBColor[0, 0, 0], Arrow[{1.25 / Tan[c13], 1.25}, {-1.25 / Tan[c13], -1.25},
    HeadCenter -> 0.5, HeadLength -> 0.035, HeadWidth -> 0.75]}},
  Graphics[{{RGBColor[0, 0, 0], Arrow[{-1.25 / Tan[c14 - Pi], -1.25}, {1.25 / Tan[c14 - Pi], 1.25},
    HeadCenter -> 0.5, HeadLength -> 0.035, HeadWidth -> 0.75]}},
  Graphics[{{RGBColor[0, 0, 0], Arrow[{-1.25 / Tan[c15], -1.25}, {1.25 / Tan[c15], 1.25},
    HeadCenter -> 0.5, HeadLength -> 0.035, HeadWidth -> 0.75]}},
  Graphics[{{RGBColor[0, 0, 0], Arrow[{1.25 / Tan[c16], 1.25}, {-1.25 / Tan[c16], -1.25},
    HeadCenter -> 0.5, HeadLength -> 0.035, HeadWidth -> 0.75]}},
  Graphics[{{RGBColor[0, 0, 0], Arrow[{-1.25, -1.25 * Tan[c17]}, {1.25, 1.25 * Tan[c17]},
    HeadCenter -> 0.5, HeadLength -> 0.035, HeadWidth -> 0.75]}},
  AspectRatio -> 1,
  PlotRange -> {{-1.25, 1.25}, {-1.25, 1.25}},
  Frame -> True,
  FrameTicks -> False,
  FrameLabel -> {None, None, None, None},
  GridLines -> {None, None},
  DisplayFunction -> Identity];
p = FullGraphics[p];
p[[1, 2]] = p[[1, 2]] /.
  Text[labely, {b_, c_}, {1., 0.}] ->
  Text[labely, {-1.18, 0}, {0, 0}, {0, 1}];
g3 = Show[p,
  AspectRatio -> 1,
  PlotRange -> All,
  DisplayFunction -> Identity];
Clear[z];

```

(\* BFR1 Projected Onto 2 D Subspace \*)

```

stages = {"G2", "M", "G1", "S"};
BFR1a = coordinates[[Position[genenames, "SPCC18B5.01C"]][[1, 1]]];
BFR1b = coordinates[[Position[genenames, "SPCC18B5.01C"]][[2, 1]]];

p = Show[{
  Graphics[{RGBColor[0, 0, 0], Text["(a)", {-1, 1.05}]}],
  Graphics[{RGBColor[0, 0, 0], Text["S. pombe", {1.1, -1.05}, {1, 0}]}],
  Graphics[{RGBColor[0, 0, 0], Text["x", {1.13, -0.07}, {1, 0}]}],
  Graphics[{RGBColor[0, 0, 0], Text["y", {-0.055, 1.145}, {0, 1}]}],
  Graphics[{RGBColor[1, 0, 0], Text["G2", {1.01, -0.54}]}],
  Graphics[{RGBColor[0, 0, 0], Text["M", {0.25, 1.07}]}],
  Graphics[{RGBColor[0, 0.5, 0], Text["G1", {-1, 0.525}]}],
  Graphics[{RGBColor[0, 0, 1], Text["S", {-0.878, -0.71}]}],
  Graphics[{RGBColor[1, 0, 0], Dashing[{0.03, 0.02}],
    {Thickness[0.009], Circle[{0, 0}, 1, {0, c15}]}]},
  Graphics[
    {RGBColor[1, 0, 0], Dashing[{0.03, 0.02}], {Thickness[0.009], Circle[{0, 0}, 1, {c15 + Pi, 2 * Pi}]}]},
  Graphics[{RGBColor[1, 1, 0], Dashing[{0.03, 0.02}],
    {Thickness[0.009], Circle[{0, 0}, 1, {c15, c14}]}]},
  Graphics[
    {RGBColor[0, 0.5, 0], Dashing[{0.03, 0.02}], {Thickness[0.009], Circle[{0, 0}, 1, {c14, Pi + c17}]}]},
  Graphics[{RGBColor[0, 0, 1], Dashing[{0.03, 0.02}],
    {Thickness[0.009], Circle[{0, 0}, 1, {Pi + c17, c15 + Pi}]}]},
  Graphics[{RGBColor[1, 0, 0], Dashing[{0.03, 0.02}],
    {Thickness[0.009], Circle[{0, 0}, 0.5, {0, c15}]}]},
  Graphics[
    {RGBColor[1, 0, 0], Dashing[{0.03, 0.02}], {Thickness[0.009], Circle[{0, 0}, 0.5, {c15 + Pi, 2 * Pi}]}]},
  Graphics[{RGBColor[1, 1, 0], Dashing[{0.03, 0.02}],
    {Thickness[0.009], Circle[{0, 0}, 0.5, {c15, c14}]}]},
  Graphics[{RGBColor[0, 0.5, 0], Dashing[{0.03, 0.02}],
    {Thickness[0.009], Circle[{0, 0}, 0.5, {c14, Pi + c17}]}]},
  Graphics[{RGBColor[0, 0, 1], Dashing[{0.03, 0.02}],
    {Thickness[0.009], Circle[{0, 0}, 0.5, {Pi + c17, c15 + Pi}]}]},
  Graphics[{RGBColor[1, 0, 0], PointSize[0.03], Point[BFR1a]}],
  Graphics[{RGBColor[1, 0, 0], PointSize[0.03], Point[BFR1b]}],
  Graphics[{RGBColor[1, 0, 0], Text["BFR1", BFR1a + {-0.05, -0.12}]}],
  Graphics[{RGBColor[1, 0, 0], Text["BFR1", BFR1b + {-0.17, 0}]}],
  Graphics[{RGBColor[0, 0, 0], Dashing[{0.03, 0.02}], Line[{{0, 1.15}, {0, -1.15}}]}],
  Graphics[{RGBColor[0, 0, 0], Dashing[{0.03, 0.02}], Line[{{1.15, 0}, {-1.15, 0}]}]}],
  AspectRatio -> 1,
  PlotRange -> {{-1.15, 1.15}, {-1.15, 1.15}},
  Frame -> True,
  FrameTicks -> False,
  FrameLabel -> {None, None, None, None},
  GridLines -> {None, None},
  DisplayFunction -> Identity];
p = FullGraphics[p];
p[[1, 2]] = p[[1, 2]] /.
  Text[labely, {b_, c_}, {1., 0.}] ->
  Text[labely, {-1.18, 0}, {0, 0}, {0, 1}];
o1 = Show[p,
  AspectRatio -> 1,
  PlotRange -> All,
  DisplayFunction -> Identity];

```



(\* SPAC1786 .02 and SPAC977 .09 c Projected Onto 2 D Subspace \*)

```
stages = {"G2", "M", "G1", "S"};
C1786a = coordinates[[Position[genenames, "SPAC1786.02"]][[1, 1]]];
C1786b = coordinates[[Position[genenames, "SPAC1786.02"]][[2, 1]]];
C977 = coordinates[[Position[genenames, "SPAC977.09C"]][[1, 1]]];

p = Show[{
  Graphics[{RGBColor[0, 0, 0], Text["(c)", {-1, 1.05}]}],
  Graphics[{RGBColor[0, 0, 0], Text["S. pombe", {1.1, -1.05}, {1, 0}]}],
  Graphics[{RGBColor[0, 0, 0], Text["x", {1.13, -0.07}, {1, 0}]}],
  Graphics[{RGBColor[0, 0, 0], Text["y", {-0.055, 1.145}, {0, 1}]}],
  Graphics[{RGBColor[1, 0, 0], Text["G2", {1.01, -0.54}]}],
  Graphics[{RGBColor[0, 0, 0], Text["M", {0.25, 1.07}]}],
  Graphics[{RGBColor[0, 0.5, 0], Text["G1", {-1, 0.525}]}],
  Graphics[{RGBColor[0, 0, 1], Text["S", {-0.878, -0.71}]}],
  Graphics[{RGBColor[1, 0, 0], Dashing[{0.03, 0.02}],
    {Thickness[0.009], Circle[{0, 0}, 1, {0, c15}]}]},
  Graphics[{RGBColor[1, 0, 0], Dashing[{0.03, 0.02}],
    {Thickness[0.009], Circle[{0, 0}, 1, {c15 + Pi, 2 * Pi}]}]},
  Graphics[{RGBColor[1, 1, 0], Dashing[{0.03, 0.02}],
    {Thickness[0.009], Circle[{0, 0}, 1, {c15, c14}]}]},
  Graphics[{RGBColor[0, 0.5, 0], Dashing[{0.03, 0.02}],
    {Thickness[0.009], Circle[{0, 0}, 1, {c14, Pi + c17}]}]},
  Graphics[{RGBColor[0, 0, 1], Dashing[{0.03, 0.02}],
    {Thickness[0.009], Circle[{0, 0}, 1, {Pi + c17, c15 + Pi}]}]},
  Graphics[{RGBColor[1, 0, 0], Dashing[{0.03, 0.02}],
    {Thickness[0.009], Circle[{0, 0}, 0.5, {0, c15}]}]},
  Graphics[{RGBColor[1, 0, 0], Dashing[{0.03, 0.02}],
    {Thickness[0.009], Circle[{0, 0}, 0.5, {c15 + Pi, 2 * Pi}]}]},
  Graphics[{RGBColor[1, 1, 0], Dashing[{0.03, 0.02}],
    {Thickness[0.009], Circle[{0, 0}, 0.5, {c15, c14}]}]},
  Graphics[{RGBColor[0, 0.5, 0], Dashing[{0.03, 0.02}],
    {Thickness[0.009], Circle[{0, 0}, 0.5, {c14, Pi + c17}]}]},
  Graphics[{RGBColor[0, 0, 1], Dashing[{0.03, 0.02}],
    {Thickness[0.009], Circle[{0, 0}, 0.5, {Pi + c17, c15 + Pi}]}]},
  Graphics[{RGBColor[1, 0, 0], PointSize[0.03], Point[C1786a]}],
  Graphics[{RGBColor[1, 0, 0], PointSize[0.03], Point[C1786b]}],
  Graphics[{RGBColor[1, 0, 0], Text["C1786.02", C1786a + {-0.05, -0.1}]}],
  Graphics[{RGBColor[1, 0, 0], Text["C1786.02", C1786b + {-0.03, -0.1}]}],
  Graphics[{RGBColor[0, 0, 1], PointSize[0.03], Point[C977]}],
  Graphics[{RGBColor[0, 0, 1], Text["C977.09C", C977 + {0.35, 0}]}],
  Graphics[{RGBColor[0, 0, 0], Dashing[{0.03, 0.02}], Line[{{0, 1.15}, {0, -1.15}}]}],
  Graphics[{RGBColor[0, 0, 0], Dashing[{0.03, 0.02}], Line[{{1.15, 0}, {-1.15, 0}]}]}],
  AspectRatio -> 1,
  PlotRange -> {{-1.15, 1.15}, {-1.15, 1.15}},
  Frame -> True,
  FrameTicks -> False,
  FrameLabel -> {None, None, None, None},
  GridLines -> {None, None},
  DisplayFunction -> Identity];
p = FullGraphics[p];
p[[1, 2]] = p[[1, 2]] /.
  Text[labely, {b_, c_}, {1., 0.}] ->
  Text[labely, {-1.18, 0}, {0, 0}, {0, 1}];
R1 = Show[p,
  AspectRatio -> 1,
  PlotRange -> All,
  DisplayFunction -> Identity];
```

(\* CIG2 Projected Onto 2 D Subspace \*)

```

stages = {"G2", "M", "G1", "S"};
cig2 = coordinates[[Position[genenames, "SPAPB2B4.03"]][[1, 1]]];
cdc13a = coordinates[[Position[genenames, "SPBC582.03"]][[1, 1]]];
cdc13b = coordinates[[Position[genenames, "SPBC582.03"]][[2, 1]]];

p = Show[{
  Graphics[{RGBColor[0, 0, 0], Text["(e)", {-1, 1.05}]}],
  Graphics[{RGBColor[0, 0, 0], Text["S. pombe", {1.1, -1.05}, {1, 0}]}],
  Graphics[{RGBColor[0, 0, 0], Text["x", {1.13, -0.07}, {1, 0}]}],
  Graphics[{RGBColor[0, 0, 0], Text["y", {-0.055, 1.145}, {0, 1}]}],
  Graphics[{RGBColor[1, 0, 0], Text["G2", {1.01, -0.54}]}],
  Graphics[{RGBColor[0, 0, 0], Text["M", {0.25, 1.07}]}],
  Graphics[{RGBColor[0, 0.5, 0], Text["G1", {-1, 0.525}]}],
  Graphics[{RGBColor[0, 0, 1], Text["S", {-0.878, -0.71}]}],
  Graphics[{RGBColor[1, 0, 0], Dashing[{0.03, 0.02}],
    {Thickness[0.009], Circle[{0, 0}, 1, {0, c15}]}]},
  Graphics[{RGBColor[1, 0, 0], Dashing[{0.03, 0.02}],
    {Thickness[0.009], Circle[{0, 0}, 1, {c15 + Pi, 2 * Pi}]}]},
  Graphics[{RGBColor[1, 1, 0], Dashing[{0.03, 0.02}],
    {Thickness[0.009], Circle[{0, 0}, 1, {c15, c14}]}]},
  Graphics[{RGBColor[0, 0.5, 0], Dashing[{0.03, 0.02}],
    {Thickness[0.009], Circle[{0, 0}, 1, {c14, Pi + c17}]}]},
  Graphics[{RGBColor[0, 0, 1], Dashing[{0.03, 0.02}],
    {Thickness[0.009], Circle[{0, 0}, 1, {Pi + c17, c15 + Pi}]}]},
  Graphics[{RGBColor[1, 0, 0], Dashing[{0.03, 0.02}],
    {Thickness[0.009], Circle[{0, 0}, 0.5, {0, c15}]}]},
  Graphics[{RGBColor[1, 0, 0], Dashing[{0.03, 0.02}],
    {Thickness[0.009], Circle[{0, 0}, 0.5, {c15 + Pi, 2 * Pi}]}]},
  Graphics[{RGBColor[1, 1, 0], Dashing[{0.03, 0.02}],
    {Thickness[0.009], Circle[{0, 0}, 0.5, {c15, c14}]}]},
  Graphics[{RGBColor[0, 0.5, 0], Dashing[{0.03, 0.02}],
    {Thickness[0.009], Circle[{0, 0}, 0.5, {c14, Pi + c17}]}]},
  Graphics[{RGBColor[0, 0, 1], Dashing[{0.03, 0.02}],
    {Thickness[0.009], Circle[{0, 0}, 0.5, {Pi + c17, c15 + Pi}]}]},
  Graphics[{RGBColor[0, 0.5, 0], PointSize[0.03], Point[cig2]}],
  Graphics[{RGBColor[0, 0.5, 0], Text["CIG2", cig2 + {0.03, -0.11}]}],
  Graphics[{RGBColor[0, 0, 0], PointSize[0.03], Point[cdc13a]}],
  Graphics[{RGBColor[0, 0, 0], PointSize[0.03], Point[cdc13b]}],
  Graphics[{RGBColor[0, 0, 0], Text["CDC13", cdc13a + {0.29, -0.08}]}],
  Graphics[{RGBColor[0, 0, 0], Text["CDC13", cdc13b + {-0.1, -0.1}]}],
  Graphics[{RGBColor[0, 0, 0], Dashing[{0.03, 0.02}], Line[{0, 1.15}, {0, -1.15}]}],
  Graphics[{RGBColor[0, 0, 0], Dashing[{0.03, 0.02}], Line[{1.15, 0}, {-1.15, 0}]}]},
  AspectRatio -> 1,
  PlotRange -> {{-1.15, 1.15}, {-1.15, 1.15}},
  Frame -> True,
  FrameTicks -> False,
  FrameLabel -> {None, None, None, None},
  GridLines -> {None, None},
  DisplayFunction -> Identity];
p = FullGraphics[p];
p[[1, 2]] = p[[1, 2]] /.
  Text[labely, {b_, c_}, {1., 0.}] ->
  Text[labely, {-1.18, 0}, {0, 0}, {0, 1}];
C1 = Show[p,
  AspectRatio -> 1,
  PlotRange -> All,
  DisplayFunction -> Identity];

```

```
(* Sort S. cerevisiae Data *)
```

```
genes = genes2;  
arraynames = arraynames2;  
genenames = genenames2;
```

```
(* Sort S. cerevisiae Arrays *)
```

```
average = Table[1, {a, 1, arrays}];  
average = N[average / Sqrt[Dot[average, average]]];
```

```
arraycontributions13 =  
  (genelets[[13]] - N[Outer[Times, Dot[genelets, average], average]][[13]]) * d2[[13, 13]];  
arraycontributions14 =  
  (genelets[[14]] - N[Outer[Times, Dot[genelets, average], average]][[14]]) * d2[[14, 14]];  
arraycontributions15 =  
  (genelets[[15]] - N[Outer[Times, Dot[genelets, average], average]][[15]]) * d2[[15, 15]];  
arraycontributions16 =  
  (genelets[[16]] - N[Outer[Times, Dot[genelets, average], average]][[16]]) * d2[[16, 16]];  
arraycontributions17 =  
  (genelets[[17]] - N[Outer[Times, Dot[genelets, average], average]][[17]]) * d2[[17, 17]];
```

```
(* Project Arrays from 5D Arraylets Subspace Onto 2D Subspace *)
```

```
coordinates = Table[{  
  (Dot[genelets[[13]], x] * arraycontributions13[[a]] +  
    Dot[genelets[[14]], x] * arraycontributions14[[a]] +  
    Dot[genelets[[15]], x] * arraycontributions15[[a]] +  
    Dot[genelets[[16]], x] * arraycontributions16[[a]] +  
    Dot[genelets[[17]], x] * arraycontributions17[[a]]) /  
  Sqrt[(a13 * arraycontributions13[[a]])^2 + (a14 * arraycontributions14[[a]])^2 +  
    (a15 * arraycontributions15[[a]])^2 + (a16 * arraycontributions16[[a]])^2 +  
    (a17 * arraycontributions17[[a]])^2 +  
    c1314 * Abs[(a13 * arraycontributions13[[a]]) * (a14 * arraycontributions14[[a]])] +  
    c1315 * Abs[(a13 * arraycontributions13[[a]]) * (a15 * arraycontributions15[[a]])] +  
    c1316 * Abs[(a13 * arraycontributions13[[a]]) * (a16 * arraycontributions16[[a]])] +  
    c1317 * Abs[(a13 * arraycontributions13[[a]]) * (a17 * arraycontributions17[[a]])] +  
    c1415 * Abs[(a14 * arraycontributions14[[a]]) * (a15 * arraycontributions15[[a]])] +  
    c1416 * Abs[(a14 * arraycontributions14[[a]]) * (a16 * arraycontributions16[[a]])] +  
    c1417 * Abs[(a14 * arraycontributions14[[a]]) * (a17 * arraycontributions17[[a]])] +  
    c1516 * Abs[(a15 * arraycontributions15[[a]]) * (a16 * arraycontributions16[[a]])] +  
    c1517 * Abs[(a15 * arraycontributions15[[a]]) * (a17 * arraycontributions17[[a]])] +  
    c1617 * Abs[(a16 * arraycontributions16[[a]]) * (a17 * arraycontributions17[[a]])],  
  (Dot[genelets[[13]], y] * arraycontributions13[[a]] +  
    Dot[genelets[[14]], y] * arraycontributions14[[a]] +  
    Dot[genelets[[15]], y] * arraycontributions15[[a]] +  
    Dot[genelets[[16]], y] * arraycontributions16[[a]] +  
    Dot[genelets[[17]], y] * arraycontributions17[[a]]) /  
  Sqrt[(a13 * arraycontributions13[[a]])^2 + (a14 * arraycontributions14[[a]])^2 +  
    (a15 * arraycontributions15[[a]])^2 + (a16 * arraycontributions16[[a]])^2 +  
    (a17 * arraycontributions17[[a]])^2 +  
    c1314 * Abs[(a13 * arraycontributions13[[a]]) * (a14 * arraycontributions14[[a]])] +  
    c1315 * Abs[(a13 * arraycontributions13[[a]]) * (a15 * arraycontributions15[[a]])] +  
    c1316 * Abs[(a13 * arraycontributions13[[a]]) * (a16 * arraycontributions16[[a]])] +  
    c1317 * Abs[(a13 * arraycontributions13[[a]]) * (a17 * arraycontributions17[[a]])] +  
    c1415 * Abs[(a14 * arraycontributions14[[a]]) * (a15 * arraycontributions15[[a]])] +  
    c1416 * Abs[(a14 * arraycontributions14[[a]]) * (a16 * arraycontributions16[[a]])] +  
    c1417 * Abs[(a14 * arraycontributions14[[a]]) * (a17 * arraycontributions17[[a]])] +  
    c1516 * Abs[(a15 * arraycontributions15[[a]]) * (a16 * arraycontributions16[[a]])] +  
    c1517 * Abs[(a15 * arraycontributions15[[a]]) * (a17 * arraycontributions17[[a]])] +  
    c1617 * Abs[(a16 * arraycontributions16[[a]]) * (a17 * arraycontributions17[[a]])],  
  {a, 1, arrays}];
```

(\* Create Parametric Plot of *S. cerevisiae* Arrays Projected Onto 2 D Subspace \*)

```
Clear[points];
points1 = {Point[coordinates[[1]], Point[coordinates[[2]], Point[coordinates[[11]]]};
points2 = {Point[coordinates[[3]], Point[coordinates[[4]],
  Point[coordinates[[5]], Point[coordinates[[12]], Point[coordinates[[13]]]};
points3 = {Point[coordinates[[6]], Point[coordinates[[14]], Point[coordinates[[15]]]};
points4 = {Point[coordinates[[7]]];
points5 = {Point[coordinates[[8]], Point[coordinates[[9]],
  Point[coordinates[[10]], Point[coordinates[[16]],
  Point[coordinates[[17]]]};
textcoordinates = coordinates;
Do[
  textcoordinates[[a, 1]] = If[
    textcoordinates[[a, 1]] > 0,
    textcoordinates[[a, 1]] + 0.095,
    textcoordinates[[a, 1]] - 0.1,
    {a, 1, 9}];
Do[
  textcoordinates[[a, 1]] =
  If[textcoordinates[[a, 1]] > 0,
    textcoordinates[[a, 1]] + 0.11,
    textcoordinates[[a, 1]] - 0.12,
    {a, 10, arrays}];
textcoordinates[[1]] = textcoordinates[[1]] - {0.095, -0.095};
textcoordinates[[6]] = textcoordinates[[6]] + {0.2, 0};
textcoordinates[[10]] = textcoordinates[[10]] - {0.1, -0.095};
textcoordinates[[11]] = textcoordinates[[11]] - {0.11, 0.1};
textcoordinates[[12]] = textcoordinates[[12]] + {0.12, -0.12};
textcoordinates[[15]] = textcoordinates[[15]] + {0, 0.05};
textcoordinates[[16]] = textcoordinates[[16]] + {0.24, 0};
textcoordinates[[17]] = textcoordinates[[17]] + {0, 0.1};
```

```

texts = Table[Text[a, textcoordinates[[a]], {a, 1, arrays}];
radius = Sqrt[coordinates[[2, 1]]^2 + coordinates[[2, 2]]^2];
p = Show[{
  Graphics[{RGBColor[0, 0, 0], Text["(b)", {-1.22, 1.15}, {-1, 0}]}],
  Graphics[{RGBColor[0, 0, 0], Text["x", {1.22, -0.075}, {1, 0}]}],
  Graphics[{RGBColor[0, 0, 0], Text["y", {-0.065, 1.22}, {0, 1}]}],
  Graphics[{RGBColor[0, 0, 0], Text["M/G1", {0.825, 0.83}]}],
  Graphics[{RGBColor[0, 0.5, 0], Text["G1", {-1, 0.525}]}],
  Graphics[{RGBColor[0, 0, 1], Text["S", {-0.878, -0.71}]}],
  Graphics[{RGBColor[1, 0, 0], Text["S/G2", {0.57, -1}]}],
  Graphics[{RGBColor[1, 0.5, 0], Text["G2/M", {1.07, -0.52}]}],
  Graphics[{RGBColor[1, 1, 0], PointSize[0.035], points1}],
  Graphics[{RGBColor[0, 0.5, 0], PointSize[0.035], points2}],
  Graphics[{RGBColor[0, 0, 1], PointSize[0.035], points3}],
  Graphics[{RGBColor[1, 0, 0], PointSize[0.035], points4}],
  Graphics[{RGBColor[1, 0.5, 0], PointSize[0.035], points5}],
  Graphics[{RGBColor[0, 0, 0], Text["u2,17", {1.235, 0.5}, {1, 0}]}],
  Graphics[{RGBColor[0, 0, 0], Text["u2,16", {0.5, -1.12}, {-1, 0}]}],
  Graphics[{RGBColor[0, 0, 0], Text["u2,15", {0.7, 1.12}, {-1, 0}]}],
  Graphics[{RGBColor[0, 0, 0], Text["u2,14", {-0.45, 1.12}, {1, 0}]}],
  Graphics[{RGBColor[0, 0, 0], Text["u2,13", {-0.025, -1.12}, {1, 0}]}],
  Graphics[texts],
  Graphics[{RGBColor[0, 0, 0], Dashing[{0.03, 0.02}], Circle[{0, 0}, 0.5]}],
  Graphics[{RGBColor[0, 0, 0], Dashing[{0.03, 0.02}], Circle[{0, 0}, 1]}],
  Graphics[{RGBColor[0, 0, 0], Dashing[{0.03, 0.02}], Line[{{0, 1.25}, {0, -1.25}}]}],
  Graphics[{RGBColor[0, 0, 0], Dashing[{0.03, 0.02}], Line[{{1.25, 0}, {-1.25, 0}}]}],
  Graphics[{RGBColor[0, 0, 0], Arrow[{1.25 / Tan[c13], 1.25}, {-1.25 / Tan[c13], -1.25},
    HeadCenter -> 0.5, HeadLength -> 0.035, HeadWidth -> 0.75]}],
  Graphics[{RGBColor[0, 0, 0], Arrow[{-1.25 / Tan[c14 - Pi], -1.25}, {1.25 / Tan[c14 - Pi], 1.25},
    HeadCenter -> 0.5, HeadLength -> 0.035, HeadWidth -> 0.75]}],
  Graphics[{RGBColor[0, 0, 0], Arrow[{-1.25 / Tan[c15], -1.25}, {1.25 / Tan[c15], 1.25},
    HeadCenter -> 0.5, HeadLength -> 0.035, HeadWidth -> 0.75]}],
  Graphics[{RGBColor[0, 0, 0], Arrow[{1.25 / Tan[c16], 1.25}, {-1.25 / Tan[c16], -1.25},
    HeadCenter -> 0.5, HeadLength -> 0.035, HeadWidth -> 0.75]}],
  Graphics[{RGBColor[0, 0, 0], Arrow[{-1.25, -1.25 * Tan[c17]}, {1.25, 1.25 * Tan[c17]},
    HeadCenter -> 0.5, HeadLength -> 0.035, HeadWidth -> 0.75]}],
  AspectRatio -> 1,
  PlotRange -> {{-1.25, 1.25}, {-1.25, 1.25}},
  Frame -> True,
  FrameTicks -> False,
  FrameLabel -> {None, None, None, None},
  GridLines -> {None, None},
  DisplayFunction -> Identity];
p = FullGraphics[p];
p[[1, 2]] = p[[1, 2]] /.
  Text[labely, {b_, c_}, {1., 0.}] ->
  Text[labely, {-1.18, 0}, {0, 0}, {0, 1}];
t1 = Show[p,
  AspectRatio -> 1,
  PlotRange -> All,
  DisplayFunction -> Identity];

```

```
(* Sort S. cerevisiae Genes *)
```

```
(* Center Arraylets and Calculate Contributions of Genelets to Genes *)
```

```
centerarraylets = Transpose[arraylets2];  
average = Table[1, {a, 1, genes}];  
average = N[average / Sqrt[Dot[average, average]]];  
centerarraylets = centerarraylets - N[Outer[Times, Dot[centerarraylets, average], average]];  
centerarraylets = Transpose[centerarraylets];  
genecontributions = Transpose[Dot[centerarraylets, d2]];
```

```
(* Project Genes from 5 D Genelets Subspace Onto 2 D Subspace *)
```

```
coordinates = Table[{  
  (Dot[genelets[[13]], x] * genecontributions[[13, a]] +  
    Dot[genelets[[14]], x] * genecontributions[[14, a]] +  
    Dot[genelets[[15]], x] * genecontributions[[15, a]] +  
    Dot[genelets[[16]], x] * genecontributions[[16, a]] +  
    Dot[genelets[[17]], x] * genecontributions[[17, a]]) /  
  Sqrt[(a13 * genecontributions[[13, a]] ^ 2 + (a14 * genecontributions[[14, a]]) ^ 2 +  
    (a15 * genecontributions[[15, a]] ^ 2 + (a16 * genecontributions[[16, a]] ^ 2 +  
    (a17 * genecontributions[[17, a]] ^ 2 +  
    c1314 * Abs[(a13 * genecontributions[[13, a]]) * (a14 * genecontributions[[14, a]])] +  
    c1315 * Abs[(a13 * genecontributions[[13, a]]) * (a15 * genecontributions[[15, a]])] +  
    c1316 * Abs[(a13 * genecontributions[[13, a]]) * (a16 * genecontributions[[16, a]])] +  
    c1317 * Abs[(a13 * genecontributions[[13, a]]) * (a17 * genecontributions[[17, a]])] +  
    c1415 * Abs[(a14 * genecontributions[[14, a]]) * (a15 * genecontributions[[15, a]])] +  
    c1416 * Abs[(a14 * genecontributions[[14, a]]) * (a16 * genecontributions[[16, a]])] +  
    c1417 * Abs[(a14 * genecontributions[[14, a]]) * (a17 * genecontributions[[17, a]])] +  
    c1516 * Abs[(a15 * genecontributions[[15, a]]) * (a16 * genecontributions[[16, a]])] +  
    c1517 * Abs[(a15 * genecontributions[[15, a]]) * (a17 * genecontributions[[17, a]])] +  
    c1617 * Abs[(a16 * genecontributions[[16, a]]) * (a17 * genecontributions[[17, a]])]),  
  (Dot[genelets[[13]], y] * genecontributions[[13, a]] +  
    Dot[genelets[[14]], y] * genecontributions[[14, a]] +  
    Dot[genelets[[15]], y] * genecontributions[[15, a]] +  
    Dot[genelets[[16]], y] * genecontributions[[16, a]] +  
    Dot[genelets[[17]], y] * genecontributions[[17, a]]) /  
  Sqrt[(a13 * genecontributions[[13, a]] ^ 2 + (a14 * genecontributions[[14, a]]) ^ 2 +  
    (a15 * genecontributions[[15, a]] ^ 2 + (a16 * genecontributions[[16, a]] ^ 2 +  
    (a17 * genecontributions[[17, a]] ^ 2 +  
    c1314 * Abs[(a13 * genecontributions[[13, a]]) * (a14 * genecontributions[[14, a]])] +  
    c1315 * Abs[(a13 * genecontributions[[13, a]]) * (a15 * genecontributions[[15, a]])] +  
    c1316 * Abs[(a13 * genecontributions[[13, a]]) * (a16 * genecontributions[[16, a]])] +  
    c1317 * Abs[(a13 * genecontributions[[13, a]]) * (a17 * genecontributions[[17, a]])] +  
    c1415 * Abs[(a14 * genecontributions[[14, a]]) * (a15 * genecontributions[[15, a]])] +  
    c1416 * Abs[(a14 * genecontributions[[14, a]]) * (a16 * genecontributions[[16, a]])] +  
    c1417 * Abs[(a14 * genecontributions[[14, a]]) * (a17 * genecontributions[[17, a]])] +  
    c1516 * Abs[(a15 * genecontributions[[15, a]]) * (a16 * genecontributions[[16, a]])] +  
    c1517 * Abs[(a15 * genecontributions[[15, a]]) * (a17 * genecontributions[[17, a]])] +  
    c1617 * Abs[(a16 * genecontributions[[16, a]]) * (a17 * genecontributions[[17, a]])]),  
  {a, 1, genes}];
```

```
(* Create Parametric Plot of S. cerevisiae Cell Cycle Genes Projected Onto 2 D Subspace *)
```

```
list = AppendRows[TakeColumns[genenames, {1, 1}], TakeColumns[genenames, {3, 3}]];  
stages = {"M/G1", "G1", "S", "S/G2", "G2/M"};  
points = {points1, points2, points3, points4, points5};  
radii = {radii1, radii2, radii3, radii4, radii5};
```

```

Do[{
  position = Position[list, stages[[b]],
  points[[b]] = Table[Point[coordinates[[position[[a]][[1]]]], {a, 1, Dimensions[position][[1]]}],
  radii[[b]] =
    Table[Sqrt[coordinates[[position[[a]][[1]]][[1]]^2 + coordinates[[position[[a]][[1]]][[2]]^2],
      {a, 1, Dimensions[position][[1]]}],
    {b, 1, Dimensions[stages][[1]]}]
radii = Sort[Flatten[radii]];
N[Round[radii[[87]] * 100 / 100]
N[Round[radii[[88]] * 100 / 100]

0.49

0.5

p = Show[{
  Graphics[{RGBColor[0, 0, 0], Text["(e)", {-1.22, 1.15}, {-1, 0}]},
  Graphics[{RGBColor[0, 0, 0], Text["x", {1.22, -0.075}, {1, 0}]},
  Graphics[{RGBColor[0, 0, 0], Text["y", {-0.065, 1.22}, {0, 1}]},
  Graphics[{RGBColor[0, 0, 0], Text["M/G1", {0.825, 0.83}]},
  Graphics[{RGBColor[0, 0.5, 0], Text["G1", {-1, 0.525}]},
  Graphics[{RGBColor[0, 0, 1], Text["S", {-0.878, -0.71}]},
  Graphics[{RGBColor[1, 0, 0], Text["S/G2", {0.57, -1}]},
  Graphics[{RGBColor[1, 0.5, 0], Text["G2/M", {1.07, -0.52}]},
  Graphics[{RGBColor[1, 0.5, 0], PointSize[0.02], points[[5]]},
  Graphics[{RGBColor[1, 1, 0], PointSize[0.02], points[[1]]},
  Graphics[{RGBColor[1, 0, 0], PointSize[0.02], points[[4]]},
  Graphics[{RGBColor[0, 0.5, 0], PointSize[0.02], points[[2]]},
  Graphics[{RGBColor[0, 0, 0], Text["v17", {1.235, 0.5}, {1, 0}]},
  Graphics[{RGBColor[0, 0, 0], Text["v16", {0.5, -1.12}, {-1, 0}]},
  Graphics[{RGBColor[0, 0, 0], Text["v15", {0.7, 1.12}, {-1, 0}]},
  Graphics[{RGBColor[0, 0, 0], Text["v14", {-0.45, 1.12}, {1, 0}]},
  Graphics[{RGBColor[0, 0, 0], Text["v13", {-0.025, -1.12}, {1, 0}]},
  Graphics[{RGBColor[0, 0, 0], Dashing[{0.03, 0.02}], Circle[{0, 0}, 0.5]}],
  Graphics[{RGBColor[0, 0, 0], Dashing[{0.03, 0.02}], Circle[{0, 0}, 1]}],
  Graphics[{RGBColor[0, 0, 0], Dashing[{0.03, 0.02}], Line[{0, 1.25}, {0, -1.25}]}],
  Graphics[{RGBColor[0, 0, 0], Dashing[{0.03, 0.02}], Line[{1.25, 0}, {-1.25, 0}]}],
  Graphics[{RGBColor[0, 0, 0], Arrow[{1.25 / Tan[c13], 1.25}, {-1.25 / Tan[c13], -1.25},
    HeadCenter -> 0.5, HeadLength -> 0.035, HeadWidth -> 0.75]}],
  Graphics[{RGBColor[0, 0, 0], Arrow[{-1.25 / Tan[c14 - Pi], -1.25}, {1.25 / Tan[c14 - Pi], 1.25},
    HeadCenter -> 0.5, HeadLength -> 0.035, HeadWidth -> 0.75]}],
  Graphics[{RGBColor[0, 0, 0], Arrow[{-1.25 / Tan[c15], -1.25}, {1.25 / Tan[c15], 1.25},
    HeadCenter -> 0.5, HeadLength -> 0.035, HeadWidth -> 0.75]}],
  Graphics[{RGBColor[0, 0, 0], Arrow[{1.25 / Tan[c16], 1.25}, {-1.25 / Tan[c16], -1.25},
    HeadCenter -> 0.5, HeadLength -> 0.035, HeadWidth -> 0.75]}],
  Graphics[{RGBColor[0, 0, 0], Arrow[{-1.25, -1.25 * Tan[c17]}, {1.25, 1.25 * Tan[c17]},
    HeadCenter -> 0.5, HeadLength -> 0.035, HeadWidth -> 0.75]}],
  AspectRatio -> 1,
  PlotRange -> {{-1.25, 1.25}, {-1.25, 1.25}},
  Frame -> True,
  FrameTicks -> False,
  FrameLabel -> {None, None, None, None},
  GridLines -> {None, None},
  DisplayFunction -> Identity];
p = FullGraphics[p];
p[[1, 2]] = p[[1, 2]] /.
  Text[labely, {b_, c_}, {1., 0.}] ->
  Text[labely, {-1.18, 0}, {0, 0}, {0, 1}];
t2 = Show[p,
  AspectRatio -> 1,
  PlotRange -> All,
  DisplayFunction -> Identity];

```

```

R[theta_] = {{Cos[theta], Sin[theta]}, {-Sin[theta], Cos[theta]}};
z = Transpose[{{0.4, 0}, {1.1, 0}, {0.75, 0.25}}];
polypoints[theta_] = Transpose[Dot[R[theta], z]];
p = Show[
  Graphics[{{RGBColor[0, 0, 0], Text["(h)", {-1.22, 1.15}, {-1, 0}]}}],
  Graphics[{{RGBColor[0, 0, 0], Text["x", {1.22, -0.075}, {1, 0}]}}],
  Graphics[{{RGBColor[0, 0, 0], Text["y", {-0.065, 1.22}, {0, 1}]}}],
  Graphics[{{RGBColor[0, 0, 0], Text["M/G1", {0.825, 0.83}]}}],
  Graphics[{{RGBColor[0, 0.5, 0], Text["G1", {-1, 0.525}]}}],
  Graphics[{{RGBColor[0, 0, 1], Text["S", {-0.878, -0.71}]}}],
  Graphics[{{RGBColor[1, 0, 0], Text["S/G2", {0.57, -1}]}}],
  Graphics[{{RGBColor[1, 0.5, 0], Text["G2/M", {1.07, -0.52}]}}],
  Graphics[{{RGBColor[0, 0, 0], Text["17", {1.235, 0.5}, {1, 0}]}}],
  Graphics[{{RGBColor[0, 0, 0], Text["16", {0.5, -1.12}, {-1, 0}]}}],
  Graphics[{{RGBColor[0, 0, 0], Text["15", {0.7, 1.12}, {-1, 0}]}}],
  Graphics[{{RGBColor[0, 0, 0], Text["14", {-0.45, 1.12}, {1, 0}]}}],
  Graphics[{{RGBColor[0, 0, 0], Text["13", {-0.025, -1.12}, {1, 0}]}}],
  Graphics[{{RGBColor[1, 0.5, 0], Disk[{0, 0}, 1, {Pi + c16, 2 * Pi}]}}],
  Graphics[{{RGBColor[1, 0.5, 0], Disk[{0, 0}, 1, {0, c17}]}}],
  Graphics[{{RGBColor[1, 1, 0], Disk[{0, 0}, 1, {c17, c14}]}}],
  Graphics[{{RGBColor[0, 0.5, 0], Disk[{0, 0}, 1, {c14, Pi + c17}]}}],
  Graphics[{{RGBColor[0, 0, 1], Disk[{0, 0}, 1, {Pi + c17, Pi + c15}]}}],
  Graphics[{{RGBColor[1, 0, 0], Disk[{0, 0}, 1, {Pi + c15, 2 * Pi + c16}]}}],
  Graphics[{{RGBColor[1, 1, 1], Disk[{0, 0}, 0.5]}},
  Graphics[{{RGBColor[1, 0.5, 0], Polygon[polypoints[2 * Pi - c17]]}},
  Graphics[{{RGBColor[1, 1, 0], Polygon[polypoints[2 * Pi - c14]]}},
  Graphics[{{RGBColor[0, 0.5, 0], Polygon[polypoints[Pi - c17]]}},
  Graphics[{{RGBColor[0, 0, 1], Polygon[polypoints[Pi - c15]]}},
  Graphics[{{RGBColor[1, 0, 0], Polygon[polypoints[2 * Pi - c16]]}},
  Graphics[{{RGBColor[0, 0, 0], Dashing[{0.03, 0.02}], Line[{{0, 1.25}, {0, -1.25}]}},
  Graphics[{{RGBColor[0, 0, 0], Dashing[{0.03, 0.02}], Line[{{1.25, 0}, {-1.25, 0}]}},
  Graphics[{{RGBColor[0, 0, 0], Arrow[{1.25 / Tan[c13], 1.25}, {-1.25 / Tan[c13], -1.25}],
    HeadCenter -> 0.5, HeadLength -> 0.035, HeadWidth -> 0.75}}],
  Graphics[{{RGBColor[0, 0, 0], Arrow[{-1.25 / Tan[c14 - Pi], -1.25}, {1.25 / Tan[c14 - Pi], 1.25}],
    HeadCenter -> 0.5, HeadLength -> 0.035, HeadWidth -> 0.75}}],
  Graphics[{{RGBColor[0, 0, 0], Arrow[{-1.25 / Tan[c15], -1.25}, {1.25 / Tan[c15], 1.25}],
    HeadCenter -> 0.5, HeadLength -> 0.035, HeadWidth -> 0.75}}],
  Graphics[{{RGBColor[0, 0, 0], Arrow[{1.25 / Tan[c16], 1.25}, {-1.25 / Tan[c16], -1.25}],
    HeadCenter -> 0.5, HeadLength -> 0.035, HeadWidth -> 0.75}}],
  Graphics[{{RGBColor[0, 0, 0], Arrow[{-1.25, -1.25 * Tan[c17]}, {1.25, 1.25 * Tan[c17]},
    HeadCenter -> 0.5, HeadLength -> 0.035, HeadWidth -> 0.75}}}],
  AspectRatio -> 1,
  PlotRange -> {{-1.25, 1.25}, {-1.25, 1.25}},
  Frame -> True,
  FrameTicks -> False,
  FrameLabel -> {None, None, None, None},
  GridLines -> {None, None},
  DisplayFunction -> Identity];
p = FullGraphics[p];
p[[1, 2]] = p[[1, 2]] /.
  Text[labely, {b_, c_}, {1., 0.}] ->
  Text[labely, {-1.18, 0}, {0, 0}, {0, 1}];
t3 = Show[p,
  AspectRatio -> 1,
  PlotRange -> All,
  DisplayFunction -> Identity];
Clear[z];

```

(\* SNQ2, PDR5, PDR10, PDR15, PDR1 Projected Onto 2 D Subspace \*)

```

stages = {"M/G1", "G1", "S", "S/G2", "G2/M"};
PDR1 = coordinates[[Position[genenames, "YGL013C"]][[1, 1]]];
SNQ2 = coordinates[[Position[genenames, "YDR011W"]][[1, 1]]];
PDR10 = coordinates[[Position[genenames, "YOR328W"]][[1, 1]]];
PDR15 = coordinates[[Position[genenames, "YDR406W"]][[1, 1]]];
PDR5 = coordinates[[Position[genenames, "YOR153W"]][[1, 1]]];

```



```

p = Show[ {
  Graphics[ {RGBColor[0, 0, 0], Text["(b)", {-1, 1.05}]},
  Graphics[ {RGBColor[0, 0, 0], Text["S. cerevisiae", {1.1, -1.05}, {1, 0}]},
  Graphics[ {RGBColor[0, 0, 0], Text["x", {1.13, -0.07}, {1, 0}]},
  Graphics[ {RGBColor[0, 0, 0], Text["y", {-0.055, 1.145}, {0, 1}]},
  Graphics[ {RGBColor[0, 0, 0], Text["M/G1", {0.825, 0.83}]},
  Graphics[ {RGBColor[0, 0.5, 0], Text["G1", {-1, 0.525}]},
  Graphics[ {RGBColor[0, 0, 1], Text["S", {-0.878, -0.71}]},
  Graphics[ {RGBColor[1, 0, 0], Text["S/G2", {-0.2, -1.08}]},
  Graphics[ {RGBColor[1, 0.5, 0], Text["G2/M", {1, -0.6}]},
  Graphics[ {RGBColor[1, 0.5, 0],
    Dashing[{0.03, 0.02}], {Thickness[0.009], Circle[{0, 0}, 1, {2 * Pi + c16, 2 * Pi}]},
  Graphics[ {RGBColor[1, 0.5, 0], Dashing[{0.03, 0.02}],
    {Thickness[0.009], Circle[{0, 0}, 1, {0, c17}]},
  Graphics[ {RGBColor[1, 1, 0], Dashing[{0.03, 0.02}], {Thickness[0.009], Circle[{0, 0}, 1, {c17, c14}]},
  Graphics[
    {RGBColor[0, 0.5, 0], Dashing[{0.03, 0.02}], {Thickness[0.009], Circle[{0, 0}, 1, {c14, Pi + c17}]},
  Graphics[ {RGBColor[0, 0, 1], Dashing[{0.03, 0.02}],
    {Thickness[0.009], Circle[{0, 0}, 1, {Pi + c17, Pi + c15}]},
  Graphics[ {RGBColor[1, 0, 0], Dashing[{0.03, 0.02}],
    {Thickness[0.009], Circle[{0, 0}, 1, {Pi + c15, 2 * Pi + c16}]},
  Graphics[ {RGBColor[1, 0.5, 0], Dashing[{0.03, 0.02}],
    {Thickness[0.009], Circle[{0, 0}, 0.5, {2 * Pi + c16, 2 * Pi}]},
  Graphics[ {RGBColor[1, 0.5, 0], Dashing[{0.03, 0.02}],
    {Thickness[0.009], Circle[{0, 0}, 0.5, {0, c17}]},
  Graphics[ {RGBColor[1, 1, 0], Dashing[{0.03, 0.02}],
    {Thickness[0.009], Circle[{0, 0}, 0.5, {c17, c14}]},
  Graphics[ {RGBColor[0, 0.5, 0], Dashing[{0.03, 0.02}],
    {Thickness[0.009], Circle[{0, 0}, 0.5, {c14, Pi + c17}]},
  Graphics[ {RGBColor[0, 0, 1], Dashing[{0.03, 0.02}],
    {Thickness[0.009], Circle[{0, 0}, 0.5, {Pi + c17, Pi + c15}]},
  Graphics[ {RGBColor[1, 0, 0], Dashing[{0.03, 0.02}],
    {Thickness[0.009], Circle[{0, 0}, 0.5, {Pi + c15, 2 * Pi + c16}]},
  Graphics[ {RGBColor[1, 0, 0], PointSize[0.03], Point[SNQ2]},
  Graphics[ {RGBColor[1, 0, 0], Text["SNQ2", SNQ2 + {-0.25, -0.07}]},
  Graphics[ {RGBColor[0, 0, 0], PointSize[0.03], Point[PDR10]},
  Graphics[ {RGBColor[0, 0, 0], Text["PDR10", PDR10 + {0.25, 0}]},
  Graphics[ {RGBColor[0, 0, 0], PointSize[0.03], Point[PDR15]},
  Graphics[ {RGBColor[0, 0, 0], Text["PDR15", PDR15 + {-0.065, -0.125}]},
  Graphics[ {RGBColor[1, 0.5, 0], PointSize[0.03], Point[PDR5]},
  Graphics[ {RGBColor[1, 0.5, 0], Text["PDR5", PDR5 + {0.1, 0.1}]},
  Graphics[ {RGBColor[1, 0, 0], PointSize[0.03], Point[PDR1]},
  Graphics[ {RGBColor[1, 0, 0], Text["PDR1", PDR1 + {0, 0.1}]},
  Graphics[ {RGBColor[0, 0, 0], Dashing[{0.03, 0.02}], Line[{{0, 1.15}, {0, -1.15}]},
  Graphics[ {RGBColor[0, 0, 0], Dashing[{0.03, 0.02}], Line[{{1.15, 0}, {-1.15, 0}]}},
  AspectRatio -> 1,
  PlotRange -> {{-1.15, 1.15}, {-1.15, 1.15}},
  Frame -> True,
  FrameTicks -> False,
  FrameLabel -> {None, None, None, None},
  GridLines -> {None, None},
  DisplayFunction -> Identity];
p = FullGraphics[p];
p[[1, 2]] = p[[1, 2]] /.
  Text[labely, {b_, c_}, {1., 0.}] ->
  Text[labely, {-1.18, 0}, {0, 0}, {0, 1}];
O2 = Show[p,
  AspectRatio -> 1,
  PlotRange -> All,
  DisplayFunction -> Identity];

```

(\* PLB1 and PLB2 Projected Onto 2 D Subspace \*)

```
stages = {"M/G1", "G1", "S", "S/G2", "G2/M"};
```

```
PLB1 = coordinates[[Position[genenames, "YMR008C"]][[1, 1]]];
```

```
PLB3 = coordinates[[Position[genenames, "YOL011W"]][[1, 1]]];
```

```
p = Show[{
  Graphics[{RGBColor[0, 0, 0], Text["(d)", {-1, 1.05}]}],
  Graphics[{RGBColor[0, 0, 0], Text["S. cerevisiae", {1.1, -1.05}, {1, 0}]}],
  Graphics[{RGBColor[0, 0, 0], Text["x", {1.13, -0.07}, {1, 0}]}],
  Graphics[{RGBColor[0, 0, 0], Text["y", {-0.055, 1.145}, {0, 1}]}],
  Graphics[{RGBColor[0, 0, 0], Text["M/G1", {0.825, 0.83}]}],
  Graphics[{RGBColor[0, 0.5, 0], Text["G1", {-1, 0.525}]}],
  Graphics[{RGBColor[0, 0, 1], Text["S", {-0.878, -0.71}]}],
  Graphics[{RGBColor[1, 0, 0], Text["S/G2", {-0.2, -1.08}]}],
  Graphics[{RGBColor[1, 0.5, 0], Text["G2/M", {1, -0.6}]}],
  Graphics[{RGBColor[1, 0.5, 0],
    Dashing[{0.03, 0.02}], {Thickness[0.009], Circle[{0, 0}, 1, {2 * Pi + c16, 2 * Pi}]}],
  Graphics[{RGBColor[1, 0.5, 0], Dashing[{0.03, 0.02}],
    {Thickness[0.009], Circle[{0, 0}, 1, {0, c17}]}],
  Graphics[{RGBColor[1, 1, 0], Dashing[{0.03, 0.02}], {Thickness[0.009], Circle[{0, 0}, 1, {c17, c14}]}],
  Graphics[
    {RGBColor[0, 0.5, 0], Dashing[{0.03, 0.02}], {Thickness[0.009], Circle[{0, 0}, 1, {c14, Pi + c17}]}],
  Graphics[{RGBColor[0, 0, 1], Dashing[{0.03, 0.02}],
    {Thickness[0.009], Circle[{0, 0}, 1, {Pi + c17, Pi + c15}]}],
  Graphics[{RGBColor[1, 0, 0], Dashing[{0.03, 0.02}],
    {Thickness[0.009], Circle[{0, 0}, 1, {Pi + c15, 2 * Pi + c16}]}],
  Graphics[{RGBColor[1, 0.5, 0], Dashing[{0.03, 0.02}],
    {Thickness[0.009], Circle[{0, 0}, 0.5, {2 * Pi + c16, 2 * Pi}]}],
  Graphics[{RGBColor[1, 0.5, 0], Dashing[{0.03, 0.02}],
    {Thickness[0.009], Circle[{0, 0}, 0.5, {0, c17}]}],
  Graphics[{RGBColor[1, 1, 0], Dashing[{0.03, 0.02}],
    {Thickness[0.009], Circle[{0, 0}, 0.5, {c17, c14}]}],
  Graphics[{RGBColor[0, 0.5, 0], Dashing[{0.03, 0.02}],
    {Thickness[0.009], Circle[{0, 0}, 0.5, {c14, Pi + c17}]}],
  Graphics[{RGBColor[0, 0, 1], Dashing[{0.03, 0.02}],
    {Thickness[0.009], Circle[{0, 0}, 0.5, {Pi + c17, Pi + c15}]}],
  Graphics[{RGBColor[1, 0, 0], Dashing[{0.03, 0.02}],
    {Thickness[0.009], Circle[{0, 0}, 0.5, {Pi + c15, 2 * Pi + c16}]}],
  Graphics[{RGBColor[0, 0, 0], PointSize[0.03], Point[PLB1]}],
  Graphics[{RGBColor[0, 0, 0], Text["PLB1", PLB1 + {-0.15, -0.1}]}],
  Graphics[{RGBColor[0, 0, 0], PointSize[0.03], Point[PLB3]}],
  Graphics[{RGBColor[0, 0, 0], Text["PLB3", PLB3 + {0.2, 0}]}],
  Graphics[{RGBColor[0, 0, 0], Dashing[{0.03, 0.02}], Line[{0, 1.15}, {0, -1.15}]}],
  Graphics[{RGBColor[0, 0, 0], Dashing[{0.03, 0.02}], Line[{1.15, 0}, {-1.15, 0}]}],
  AspectRatio -> 1,
  PlotRange -> {{-1.15, 1.15}, {-1.15, 1.15}},
  Frame -> True,
  FrameTicks -> False,
  FrameLabel -> {None, None, None, None},
  GridLines -> {None, None},
  DisplayFunction -> Identity];
p = FullGraphics[p];
p[[1, 2]] = p[[1, 2]] /.
  Text[labely, {b_, c_}, {1., 0.}] ->
  Text[labely, {-1.18, 0}, {0, 0}, {0, 1}];
R2 = Show[p,
  AspectRatio -> 1,
  PlotRange -> All,
  DisplayFunction -> Identity];
```

(\* CLB1, CLB2, CLB3, CLB4, CLN1, CLN2 and CLN3 Projected Onto 2 D Subspace \*)

```
stages = {"M/G1", "G1", "S", "S/G2", "G2/M"};
CLN1 = coordinates[[Position[genenames, "YMR199W"]][[1, 1]]];
CLN2 = coordinates[[Position[genenames, "YPL256C"]][[1, 1]]];
CLN3 = coordinates[[Position[genenames, "YAL040C"]][[1, 1]]];
CLB1 = coordinates[[Position[genenames, "YGR108W"]][[1, 1]]];
CLB2 = coordinates[[Position[genenames, "YPR119W"]][[1, 1]]];
CLB3 = coordinates[[Position[genenames, "YDL155W"]][[1, 1]]];
CLB4 = coordinates[[Position[genenames, "YLR210W"]][[1, 1]]];
CLB5 = coordinates[[Position[genenames, "YPR120C"]][[1, 1]]];
```

```

p = Show[ {
  Graphics[ {RGBColor[0, 0, 0], Text["(f)", {-1, 1.05}]},
  Graphics[ {RGBColor[0, 0, 0], Text["S. cerevisiae", {1.1, -1.05}, {1, 0}]},
  Graphics[ {RGBColor[0, 0, 0], Text["x", {1.13, -0.07}, {1, 0}]},
  Graphics[ {RGBColor[0, 0, 0], Text["y", {-0.055, 1.145}, {0, 1}]},
  Graphics[ {RGBColor[0, 0, 0], Text["M/G1", {0.825, 0.83}]},
  Graphics[ {RGBColor[0, 0.5, 0], Text["G1", {-1, 0.525}]},
  Graphics[ {RGBColor[0, 0, 1], Text["S", {-0.878, -0.71}]},
  Graphics[ {RGBColor[1, 0, 0], Text["S/G2", {-0.2, -1.08}]},
  Graphics[ {RGBColor[1, 0.5, 0], Text["G2/M", {1, -0.6}]},
  Graphics[ {RGBColor[1, 0.5, 0], Dashing[{0.03, 0.02}],
    {Thickness[0.009], Circle[{0, 0}, 1, {2 * Pi + c16, 2 * Pi}]},
  Graphics[ {RGBColor[1, 0.5, 0], Dashing[{0.03, 0.02}],
    {Thickness[0.009], Circle[{0, 0}, 1, {0, c17}]},
  Graphics[ {RGBColor[1, 1, 0], Dashing[{0.03, 0.02}],
    {Thickness[0.009], Circle[{0, 0}, 1, {c17, c14}]},
  Graphics[ {RGBColor[0, 0.5, 0], Dashing[{0.03, 0.02}],
    {Thickness[0.009], Circle[{0, 0}, 1, {c14, Pi + c17}]},
  Graphics[ {RGBColor[0, 0, 1], Dashing[{0.03, 0.02}],
    {Thickness[0.009], Circle[{0, 0}, 1, {Pi + c17, Pi + c15}]},
  Graphics[ {RGBColor[1, 0, 0], Dashing[{0.03, 0.02}],
    {Thickness[0.009], Circle[{0, 0}, 1, {Pi + c15, 2 * Pi + c16}]},
  Graphics[ {RGBColor[1, 0.5, 0], Dashing[{0.03, 0.02}],
    {Thickness[0.009], Circle[{0, 0}, 0.5, {2 * Pi + c16, 2 * Pi}]},
  Graphics[ {RGBColor[1, 0.5, 0], Dashing[{0.03, 0.02}],
    {Thickness[0.009], Circle[{0, 0}, 0.5, {0, c17}]},
  Graphics[ {RGBColor[1, 1, 0], Dashing[{0.03, 0.02}],
    {Thickness[0.009], Circle[{0, 0}, 0.5, {c17, c14}]},
  Graphics[ {RGBColor[0, 0.5, 0], Dashing[{0.03, 0.02}],
    {Thickness[0.009], Circle[{0, 0}, 0.5, {c14, Pi + c17}]},
  Graphics[ {RGBColor[0, 0, 1], Dashing[{0.03, 0.02}],
    {Thickness[0.009], Circle[{0, 0}, 0.5, {Pi + c17, Pi + c15}]},
  Graphics[ {RGBColor[1, 0, 0], Dashing[{0.03, 0.02}],
    {Thickness[0.009], Circle[{0, 0}, 0.5, {Pi + c15, 2 * Pi + c16}]},
  Graphics[ {RGBColor[0, 0.5, 0], PointSize[0.03], Point[CLN1]},
  Graphics[ {RGBColor[0, 0.5, 0], Text["CLN1", CLN1 + {0.2, 0}]},
  Graphics[ {RGBColor[0, 0.5, 0], PointSize[0.03], Point[CLN2]},
  Graphics[ {RGBColor[0, 0.5, 0], Text["CLN2", CLN2 + {0.2, 0}]},
  Graphics[ {RGBColor[0, 0, 0], PointSize[0.03], Point[CLN3]},
  Graphics[ {RGBColor[0, 0, 0], Text["CLN3", CLN3 + {-0.2, 0}]},
  Graphics[ {RGBColor[1, 0.5, 0], PointSize[0.03], Point[CLB1]},
  Graphics[ {RGBColor[1, 0.5, 0], Text["CLB1", CLB1 + {-0.18, 0}]},
  Graphics[ {RGBColor[1, 0.5, 0], PointSize[0.03], Point[CLB2]},
  Graphics[ {RGBColor[1, 0.5, 0], Text["CLB2", CLB2 + {-0.18, 0}]},
  Graphics[ {RGBColor[0, 0, 1], PointSize[0.03], Point[CLB3]},
  Graphics[ {RGBColor[0, 0, 1], Text["CLB3", CLB3 + {-0.2, 0}]},
  Graphics[ {RGBColor[0, 0, 1], PointSize[0.03], Point[CLB4]},
  Graphics[ {RGBColor[0, 0, 1], Text["CLB4", CLB4 + {0.2, 0}]},
  Graphics[ {RGBColor[0, 0.5, 0], PointSize[0.03], Point[CLB5]},
  Graphics[ {RGBColor[0, 0.5, 0], Text["CLB5", CLB5 + {0, 0.1}]},
  Graphics[ {RGBColor[0, 0, 0], Dashing[{0.03, 0.02}], Line[{{0, 1.15}, {0, -1.15}}]},
  Graphics[ {RGBColor[0, 0, 0], Dashing[{0.03, 0.02}], Line[{{1.15, 0}, {-1.15, 0}}]}],
AspectRatio -> 1,
PlotRange -> {{-1.15, 1.15}, {-1.15, 1.15}},
Frame -> True,
FrameTicks -> False,
FrameLabel -> {None, None, None, None},
GridLines -> {None, None},
DisplayFunction -> Identity];
p = FullGraphics[p];
p[[1, 2]] = p[[1, 2]] /. Text[labely, {b_, c_}, {1., 0.}] ->
  Text[labely, {-1.18, 0}, {0, 0}, {0, 1}];
c2 = Show[p,
  AspectRatio -> 1,
  PlotRange -> All,
  DisplayFunction -> Identity];

```

```
(* Sort Human Data *)
```

```
genes = genes3;  
arraynames = arraynames3;  
genenames = TakeColumns[genenames3, {1, 3}];
```

```
(* Sort Human Arrays *)
```

```
(* Center Genelets and Calculate Contributions of Arraylets to Arrays *)
```

```
average = Table[1, {a, 1, arrays}];  
average = N[average / Sqrt[Dot[average, average]]];  
  
arraycontributions13 =  
  (genelets[[13]] - N[Outer[Times, Dot[genelets, average], average]][[13]]) * d3[[13, 13]];  
arraycontributions14 =  
  (genelets[[14]] - N[Outer[Times, Dot[genelets, average], average]][[14]]) * d3[[14, 14]];  
arraycontributions15 =  
  (genelets[[15]] - N[Outer[Times, Dot[genelets, average], average]][[15]]) * d3[[15, 15]];  
arraycontributions16 =  
  (genelets[[16]] - N[Outer[Times, Dot[genelets, average], average]][[16]]) * d3[[16, 16]];  
arraycontributions17 =  
  (genelets[[17]] - N[Outer[Times, Dot[genelets, average], average]][[17]]) * d3[[17, 17]];
```

```
(* Project Arrays from 5 D Arraylets Subspace Onto 2 D Subspace *)
```

```
coordinates = Table[{  
  (Dot[genelets[[13]], x] * arraycontributions13[[a]] +  
    Dot[genelets[[14]], x] * arraycontributions14[[a]] +  
    Dot[genelets[[15]], x] * arraycontributions15[[a]] +  
    Dot[genelets[[16]], x] * arraycontributions16[[a]] +  
    Dot[genelets[[17]], x] * arraycontributions17[[a]]) /  
  Sqrt[(a13 * arraycontributions13[[a]])^2 + (a14 * arraycontributions14[[a]])^2 +  
    (a15 * arraycontributions15[[a]])^2 + (a16 * arraycontributions16[[a]])^2 +  
    (a17 * arraycontributions17[[a]])^2 +  
    c1314 * Abs[(a13 * arraycontributions13[[a]]) * (a14 * arraycontributions14[[a]])] +  
    c1315 * Abs[(a13 * arraycontributions13[[a]]) * (a15 * arraycontributions15[[a]])] +  
    c1316 * Abs[(a13 * arraycontributions13[[a]]) * (a16 * arraycontributions16[[a]])] +  
    c1317 * Abs[(a13 * arraycontributions13[[a]]) * (a17 * arraycontributions17[[a]])] +  
    c1415 * Abs[(a14 * arraycontributions14[[a]]) * (a15 * arraycontributions15[[a]])] +  
    c1416 * Abs[(a14 * arraycontributions14[[a]]) * (a16 * arraycontributions16[[a]])] +  
    c1417 * Abs[(a14 * arraycontributions14[[a]]) * (a17 * arraycontributions17[[a]])] +  
    c1516 * Abs[(a15 * arraycontributions15[[a]]) * (a16 * arraycontributions16[[a]])] +  
    c1517 * Abs[(a15 * arraycontributions15[[a]]) * (a17 * arraycontributions17[[a]])] +  
    c1617 * Abs[(a16 * arraycontributions16[[a]]) * (a17 * arraycontributions17[[a]])],  
  (Dot[genelets[[13]], y] * arraycontributions13[[a]] +  
    Dot[genelets[[14]], y] * arraycontributions14[[a]] +  
    Dot[genelets[[15]], y] * arraycontributions15[[a]] +  
    Dot[genelets[[16]], y] * arraycontributions16[[a]] +  
    Dot[genelets[[17]], y] * arraycontributions17[[a]]) /  
  Sqrt[(a13 * arraycontributions13[[a]])^2 + (a14 * arraycontributions14[[a]])^2 +  
    (a15 * arraycontributions15[[a]])^2 + (a16 * arraycontributions16[[a]])^2 +  
    (a17 * arraycontributions17[[a]])^2 +  
    c1314 * Abs[(a13 * arraycontributions13[[a]]) * (a14 * arraycontributions14[[a]])] +  
    c1315 * Abs[(a13 * arraycontributions13[[a]]) * (a15 * arraycontributions15[[a]])] +  
    c1316 * Abs[(a13 * arraycontributions13[[a]]) * (a16 * arraycontributions16[[a]])] +  
    c1317 * Abs[(a13 * arraycontributions13[[a]]) * (a17 * arraycontributions17[[a]])] +  
    c1415 * Abs[(a14 * arraycontributions14[[a]]) * (a15 * arraycontributions15[[a]])] +  
    c1416 * Abs[(a14 * arraycontributions14[[a]]) * (a16 * arraycontributions16[[a]])] +  
    c1417 * Abs[(a14 * arraycontributions14[[a]]) * (a17 * arraycontributions17[[a]])] +  
    c1516 * Abs[(a15 * arraycontributions15[[a]]) * (a16 * arraycontributions16[[a]])] +  
    c1517 * Abs[(a15 * arraycontributions15[[a]]) * (a17 * arraycontributions17[[a]])] +  
    c1617 * Abs[(a16 * arraycontributions16[[a]]) * (a17 * arraycontributions17[[a]])],  
  {a, 1, arrays}];
```

(\* Create Parametric Plot of Human Arrays Projected Onto 2D Subspace \*)

```
Clear[points];
points1 = {Point[coordinates[[5]], Point[coordinates[[6]],
  Point[coordinates[[12]], Point[coordinates[[13]]]};
points2 = {Point[coordinates[[7]], Point[coordinates[[8]],
  Point[coordinates[[15]], Point[coordinates[[14]], Point[coordinates[[16]]]};
points3 = {Point[coordinates[[1]], Point[coordinates[[2]], Point[coordinates[[9]]]};
points4 = {Point[coordinates[[3]], Point[coordinates[[10]], Point[coordinates[[17]]]};
points5 = {Point[coordinates[[4]], Point[coordinates[[11]]]};
textcoordinates = coordinates;
Do[
  textcoordinates[[a, 1]] = If[
    textcoordinates[[a, 1]] > 0,
    textcoordinates[[a, 1]] + 0.095,
    textcoordinates[[a, 1]] - 0.1,
    {a, 1, 9}];
Do[textcoordinates[[a, 1]] =
  If[
    textcoordinates[[a, 1]] > 0,
    textcoordinates[[a, 1]] + 0.11,
    textcoordinates[[a, 1]] - 0.12,
    {a, 10, arrays}];
textcoordinates[[1]] = textcoordinates[[1]] - {0.095, -0.095};
textcoordinates[[6]] = textcoordinates[[6]] + {0.2, 0};
textcoordinates[[10]] = textcoordinates[[10]] - {0.1, -0.095};
textcoordinates[[11]] = textcoordinates[[11]] - {0.11, 0.1};
textcoordinates[[12]] = textcoordinates[[12]] + {0.12, -0.12};
textcoordinates[[14]] = textcoordinates[[14]] + {0.11, 0.1};
textcoordinates[[15]] = textcoordinates[[15]] + {0, 0.05};
textcoordinates[[16]] = textcoordinates[[16]] + {0.24, 0};
textcoordinates[[17]] = textcoordinates[[17]] + {-0.25, 0};

texts = Table[Text[a, textcoordinates[[a]], {a, 1, arrays}];
zerophase = N[ArcTan[coordinates[[1, 2]] / (coordinates[[1, 1]])];
radius = Sqrt[coordinates[[2, 1]]^2 + coordinates[[2, 2]]^2];
```

```

p = Show[{
  Graphics[{RGBColor[0, 0, 0], Text["(c)", {-1.22, 1.15}, {-1, 0}]}],
  Graphics[{RGBColor[0, 0, 0], Text["x", {1.22, -0.075}, {1, 0}]}],
  Graphics[{RGBColor[0, 0, 0], Text["y", {-0.065, 1.22}, {0, 1}]}],
  Graphics[{RGBColor[0, 0, 1], Text["S", {0.97, -0.52}]}],
  Graphics[{RGBColor[1, 0, 0], Text["G2", {0.88, 0.7}]}],
  Graphics[{RGBColor[1, 0.5, 0], Text["G2/M", {0.3, 1.08}]}],
  Graphics[{RGBColor[0, 0, 0], Text["M/G1", {-1.02, 0.55}]}],
  Graphics[{RGBColor[0, 0.5, 0], Text["G1/S", {-0.878, -0.81}]}],
  Graphics[{RGBColor[1, 1, 0], PointSize[0.035], points1}],
  Graphics[{RGBColor[0, 0.5, 0], PointSize[0.035], points2}],
  Graphics[{RGBColor[0, 0, 1], PointSize[0.035], points3}],
  Graphics[{RGBColor[1, 0, 0], PointSize[0.035], points4}],
  Graphics[{RGBColor[1, 0.5, 0], PointSize[0.035], points5}],
  Graphics[{RGBColor[0, 0, 0], Text["u3,17", {1.235, 0.5}, {1, 0}]}],
  Graphics[{RGBColor[0, 0, 0], Text["u3,16", {0.5, -1.12}, {-1, 0}]}],
  Graphics[{RGBColor[0, 0, 0], Text["u3,15", {0.7, 1.12}, {-1, 0}]}],
  Graphics[{RGBColor[0, 0, 0], Text["u3,14", {-0.45, 1.12}, {1, 0}]}],
  Graphics[{RGBColor[0, 0, 0], Text["u3,13", {-0.025, -1.12}, {1, 0}]}],
  Graphics[texts],
  Graphics[{RGBColor[0, 0, 0], Dashing[{0.03, 0.02}], Circle[{0, 0}, 0.5]}],
  Graphics[{RGBColor[0, 0, 0], Dashing[{0.03, 0.02}], Circle[{0, 0}, 1]}],
  Graphics[{RGBColor[0, 0, 0], Dashing[{0.03, 0.02}], Line[{{0, 1.25}, {0, -1.25}}]}],
  Graphics[{RGBColor[0, 0, 0], Dashing[{0.03, 0.02}], Line[{{1.25, 0}, {-1.25, 0}}]}],
  Graphics[{RGBColor[0, 0, 0], Arrow[{1.25 / Tan[c13], 1.25}, {-1.25 / Tan[c13], -1.25},
    HeadCenter -> 0.5, HeadLength -> 0.035, HeadWidth -> 0.75]}],
  Graphics[{RGBColor[0, 0, 0], Arrow[{-1.25 / Tan[c14 - Pi], -1.25}, {1.25 / Tan[c14 - Pi], 1.25},
    HeadCenter -> 0.5, HeadLength -> 0.035, HeadWidth -> 0.75]}],
  Graphics[{RGBColor[0, 0, 0], Arrow[{-1.25 / Tan[c15], -1.25}, {1.25 / Tan[c15], 1.25},
    HeadCenter -> 0.5, HeadLength -> 0.035, HeadWidth -> 0.75]}],
  Graphics[{RGBColor[0, 0, 0], Arrow[{1.25 / Tan[c16], 1.25}, {-1.25 / Tan[c16], -1.25},
    HeadCenter -> 0.5, HeadLength -> 0.035, HeadWidth -> 0.75]}],
  Graphics[{RGBColor[0, 0, 0], Arrow[{-1.25, -1.25 * Tan[c17]}, {1.25, 1.25 * Tan[c17]},
    HeadCenter -> 0.5, HeadLength -> 0.035, HeadWidth -> 0.75]}],
  AspectRatio -> 1,
  PlotRange -> {{-1.25, 1.25}, {-1.25, 1.25}},
  Frame -> True,
  FrameTicks -> False,
  FrameLabel -> {None, None, None, None},
  GridLines -> {None, None},
  DisplayFunction -> Identity];
p = FullGraphics[p];
p[[1, 2]] = p[[1, 2]] /.
  Text[labely, {b_, c_}, {1., 0.}] ->
  Text[labely, {-1.18, 0}, {0, 0}, {0, 1}];
p4 = Show[p,
  AspectRatio -> 1,
  PlotRange -> All,
  DisplayFunction -> Identity];

```

(\* Sort Human Genes \*)

(\* Center Arraylets and Calculate Contributions of Genelets to Genes \*)

```
centerarraylets = Transpose[arraylets3];
average = Table[1, {a, 1, genes}];
average = N[average / Sqrt[Dot[average, average]]];
centerarraylets = centerarraylets - N[Outer[Times, Dot[centerarraylets, average], average]];
centerarraylets = Transpose[centerarraylets];
genecontributions = Transpose[Dot[centerarraylets, d3]];
```

(\* Project Genes from 5 D Genelets Subspace Onto 2 D Subspace \*)

```
coordinates = Table[{
  (Dot[genelets[[13]], x] * genecontributions[[13, a]] +
   Dot[genelets[[14]], x] * genecontributions[[14, a]] +
   Dot[genelets[[15]], x] * genecontributions[[15, a]] +
   Dot[genelets[[16]], x] * genecontributions[[16, a]] +
   Dot[genelets[[17]], x] * genecontributions[[17, a]]) /
  Sqrt[(a13 * genecontributions[[13, a]])^2 + (a14 * genecontributions[[14, a]])^2 +
        (a15 * genecontributions[[15, a]])^2 + (a16 * genecontributions[[16, a]])^2 +
        (a17 * genecontributions[[17, a]])^2 +
        c1314 * Abs[(a13 * genecontributions[[13, a]]) * (a14 * genecontributions[[14, a]])] +
        c1315 * Abs[(a13 * genecontributions[[13, a]]) * (a15 * genecontributions[[15, a]])] +
        c1316 * Abs[(a13 * genecontributions[[13, a]]) * (a16 * genecontributions[[16, a]])] +
        c1317 * Abs[(a13 * genecontributions[[13, a]]) * (a17 * genecontributions[[17, a]])] +
        c1415 * Abs[(a14 * genecontributions[[14, a]]) * (a15 * genecontributions[[15, a]])] +
        c1416 * Abs[(a14 * genecontributions[[14, a]]) * (a16 * genecontributions[[16, a]])] +
        c1417 * Abs[(a14 * genecontributions[[14, a]]) * (a17 * genecontributions[[17, a]])] +
        c1516 * Abs[(a15 * genecontributions[[15, a]]) * (a16 * genecontributions[[16, a]])] +
        c1517 * Abs[(a15 * genecontributions[[15, a]]) * (a17 * genecontributions[[17, a]])] +
        c1617 * Abs[(a16 * genecontributions[[16, a]]) * (a17 * genecontributions[[17, a]])]),
  (Dot[genelets[[13]], y] * genecontributions[[13, a]] +
   Dot[genelets[[14]], y] * genecontributions[[14, a]] +
   Dot[genelets[[15]], y] * genecontributions[[15, a]] +
   Dot[genelets[[16]], y] * genecontributions[[16, a]] +
   Dot[genelets[[17]], y] * genecontributions[[17, a]]) /
  Sqrt[(a13 * genecontributions[[13, a]])^2 + (a14 * genecontributions[[14, a]])^2 +
        (a15 * genecontributions[[15, a]])^2 + (a16 * genecontributions[[16, a]])^2 +
        (a17 * genecontributions[[17, a]])^2 +
        c1314 * Abs[(a13 * genecontributions[[13, a]]) * (a14 * genecontributions[[14, a]])] +
        c1315 * Abs[(a13 * genecontributions[[13, a]]) * (a15 * genecontributions[[15, a]])] +
        c1316 * Abs[(a13 * genecontributions[[13, a]]) * (a16 * genecontributions[[16, a]])] +
        c1317 * Abs[(a13 * genecontributions[[13, a]]) * (a17 * genecontributions[[17, a]])] +
        c1415 * Abs[(a14 * genecontributions[[14, a]]) * (a15 * genecontributions[[15, a]])] +
        c1416 * Abs[(a14 * genecontributions[[14, a]]) * (a16 * genecontributions[[16, a]])] +
        c1417 * Abs[(a14 * genecontributions[[14, a]]) * (a17 * genecontributions[[17, a]])] +
        c1516 * Abs[(a15 * genecontributions[[15, a]]) * (a16 * genecontributions[[16, a]])] +
        c1517 * Abs[(a15 * genecontributions[[15, a]]) * (a17 * genecontributions[[17, a]])] +
        c1617 * Abs[(a16 * genecontributions[[16, a]]) * (a17 * genecontributions[[17, a]])]),
  {a, 1, genes}];
```

(\* Create Parametric Plot of Cell Cycle Genes Projected Onto 2 D Subspace \*)

```
list = AppendRows[TakeColumns[genenames, {1, 1}], TakeColumns[genenames, {3, 3}]];
stages = {"M/G1", "G1/S", "S", "G2", "G2/M"};
points = {points1, points2, points3, points4, points5};
radii = {radii1, radii2, radii3, radii4, radii5};
```



```

Do[{{
  position = Position[list, stages[[b]],
  points[[b]] = Table[Point[coordinates[[position[[a]][[1]]]], {a, 1, Dimensions[position][[1]]}],
  radii[[b]] =
    Table[Sqrt[coordinates[[position[[a]][[1]]][[1]]^2 + coordinates[[position[[a]][[1]]][[2]]^2],
      {a, 1, Dimensions[position][[1]]}],
    {b, 1, Dimensions[stages][[1]]}]
radii = Sort[Flatten[radii]];
N[Round[radii[[155]] * 100 / 100]
N[Round[radii[[156]] * 100 / 100]

0.49

0.5

p = Show[{{
  Graphics[{{RGBColor[0, 0, 0], Text["(f)", {-1.22, 1.15}, {-1, 0}}]},
  Graphics[{{RGBColor[0, 0, 0], Text["x", {1.22, -0.075}, {1, 0}}]},
  Graphics[{{RGBColor[0, 0, 0], Text["y", {-0.065, 1.22}, {0, 1}}]},
  Graphics[{{RGBColor[0, 0, 1], Text["S", {0.97, -0.52}}]},
  Graphics[{{RGBColor[1, 0, 0], Text["G2", {0.88, 0.7}}]},
  Graphics[{{RGBColor[1, 0.5, 0], Text["G2/M", {0.3, 1.08}}]},
  Graphics[{{RGBColor[0, 0, 0], Text["M/G1", {-1.02, 0.55}}]},
  Graphics[{{RGBColor[0, 0.5, 0], Text["G1/S", {-0.878, -0.81}}]},
  Graphics[{{RGBColor[1, 0.5, 0], PointSize[0.02], points[[5]]}},
  Graphics[{{RGBColor[1, 1, 0], PointSize[0.02], points[[1]]}},
  Graphics[{{RGBColor[1, 0, 0], PointSize[0.02], points[[4]]}},
  Graphics[{{RGBColor[0, 0.5, 0], PointSize[0.02], points[[2]]}},
  Graphics[{{RGBColor[0, 0, 1], PointSize[0.02], points[[3]]}},
  Graphics[{{RGBColor[0, 0, 0], Text["v17", {1.235, 0.5}, {1, 0}}]},
  Graphics[{{RGBColor[0, 0, 0], Text["v16", {0.5, -1.12}, {-1, 0}}]},
  Graphics[{{RGBColor[0, 0, 0], Text["v15", {0.7, 1.12}, {-1, 0}}]},
  Graphics[{{RGBColor[0, 0, 0], Text["v14", {-0.45, 1.12}, {1, 0}}]},
  Graphics[{{RGBColor[0, 0, 0], Text["v13", {-0.025, -1.12}, {1, 0}}]},
  Graphics[{{RGBColor[0, 0, 0], Dashing[{0.03, 0.02}], Circle[{0, 0}, 0.5]}]},
  Graphics[{{RGBColor[0, 0, 0], Dashing[{0.03, 0.02}], Circle[{0, 0}, 1]}]},
  Graphics[{{RGBColor[0, 0, 0], Dashing[{0.03, 0.02}], Line[{{0, 1.25}, {0, -1.25}}]}]},
  Graphics[{{RGBColor[0, 0, 0], Dashing[{0.03, 0.02}], Line[{{1.25, 0}, {-1.25, 0}}]}]},
  Graphics[{{RGBColor[0, 0, 0], Arrow[{1.25 / Tan[c13], 1.25}, {-1.25 / Tan[c13], -1.25},
    HeadCenter -> 0.5, HeadLength -> 0.035, HeadWidth -> 0.75]}]},
  Graphics[{{RGBColor[0, 0, 0], Arrow[{-1.25 / Tan[c14 - Pi], -1.25}, {1.25 / Tan[c14 - Pi], 1.25},
    HeadCenter -> 0.5, HeadLength -> 0.035, HeadWidth -> 0.75]}]},
  Graphics[{{RGBColor[0, 0, 0], Arrow[{-1.25 / Tan[c15], -1.25}, {1.25 / Tan[c15], 1.25},
    HeadCenter -> 0.5, HeadLength -> 0.035, HeadWidth -> 0.75]}]},
  Graphics[{{RGBColor[0, 0, 0], Arrow[{1.25 / Tan[c16], 1.25}, {-1.25 / Tan[c16], -1.25},
    HeadCenter -> 0.5, HeadLength -> 0.035, HeadWidth -> 0.75]}]},
  Graphics[{{RGBColor[0, 0, 0], Arrow[{-1.25, -1.25 * Tan[c17]}, {1.25, 1.25 * Tan[c17]},
    HeadCenter -> 0.5, HeadLength -> 0.035, HeadWidth -> 0.75]}]},
  AspectRatio -> 1,
  PlotRange -> {{-1.25, 1.25}, {-1.25, 1.25}},
  Frame -> True,
  FrameTicks -> False,
  FrameLabel -> {None, None, None, None},
  GridLines -> {None, None},
  DisplayFunction -> Identity];
p = FullGraphics[p];
p[[1, 2]] = p[[1, 2]] /.
  Text[labely, {b_, c_}, {1., 0.}] ->
  Text[labely, {-1.18, 0}, {0, 0}, {0, 1}];
p5 = Show[p,
  AspectRatio -> 1,
  PlotRange -> All,
  DisplayFunction -> Identity];

```

```

R[theta_] = {{Cos[theta], Sin[theta]}, {-Sin[theta], Cos[theta]}};
z = Transpose[{{0.4, 0}, {1.1, 0}, {0.75, 0.25}}];
polypoints[theta_] = Transpose[Dot[R[theta], z]];
p = Show[
  Graphics[{{RGBColor[0, 0, 0], Text["(i)", {-1.22, 1.15}, {-1, 0}]}}],
  Graphics[{{RGBColor[0, 0, 0], Text["x", {1.22, -0.075}, {1, 0}]}}],
  Graphics[{{RGBColor[0, 0, 0], Text["y", {-0.065, 1.22}, {0, 1}]}}],
  Graphics[{{RGBColor[0, 0, 1], Text["S", {0.97, -0.52}]}}],
  Graphics[{{RGBColor[1, 0, 0], Text["G2", {0.88, 0.7}]}}],
  Graphics[{{RGBColor[1, 0.5, 0], Text["G2/M", {0.3, 1.08}]}}],
  Graphics[{{RGBColor[0, 0, 0], Text["M/G1", {-1.02, 0.55}]}}],
  Graphics[{{RGBColor[0, 0.5, 0], Text["G1/S", {-0.878, -0.81}]}}],
  Graphics[{{RGBColor[0, 0, 0], Text["17", {1.235, 0.5}, {1, 0}]}}],
  Graphics[{{RGBColor[0, 0, 0], Text["16", {0.5, -1.12}, {-1, 0}]}}],
  Graphics[{{RGBColor[0, 0, 0], Text["15", {0.7, 1.12}, {-1, 0}]}}],
  Graphics[{{RGBColor[0, 0, 0], Text["14", {-0.45, 1.12}, {1, 0}]}}],
  Graphics[{{RGBColor[0, 0, 0], Text["13", {-0.025, -1.12}, {1, 0}]}}],
  Graphics[{{RGBColor[0, 0, 1], Disk[{0, 0}, 1, {Pi + c16, 2 * Pi}]}}],
  Graphics[{{RGBColor[0, 0, 1], Disk[{0, 0}, 1, {0, c17}]}}],
  Graphics[{{RGBColor[1, 0, 0], Disk[{0, 0}, 1, {c17, c15}]}}],
  Graphics[{{RGBColor[1, 0.5, 0], Disk[{0, 0}, 1, {c15, c14}]}}],
  Graphics[{{RGBColor[1, 1, 0], Disk[{0, 0}, 1, {c14, Pi + c17}]}}],
  Graphics[{{RGBColor[0, 0.5, 0], Disk[{0, 0}, 1, {Pi + c17, 2 * Pi + c16}]}}],
  Graphics[{{RGBColor[1, 1, 1], Disk[{0, 0}, 0.5]}},
  Graphics[{{RGBColor[0, 0, 1], Polygon[polypoints[2 * Pi - c17]]}},
  Graphics[{{RGBColor[1, 0, 0], Polygon[polypoints[2 * Pi - c15]]}},
  Graphics[{{RGBColor[1, 0.5, 0], Polygon[polypoints[2 * Pi - c14]]}},
  Graphics[{{RGBColor[1, 1, 0], Polygon[polypoints[Pi - c17]]}},
  Graphics[{{RGBColor[0, 0.5, 0], Polygon[polypoints[2 * Pi - c16]]}},
  Graphics[{{RGBColor[0, 0, 0], Dashing[{0.03, 0.02}], Line[{{0, 1.25}, {0, -1.25}]}}],
  Graphics[{{RGBColor[0, 0, 0], Dashing[{0.03, 0.02}], Line[{{1.25, 0}, {-1.25, 0}]}}],
  Graphics[{{RGBColor[0, 0, 0], Arrow[{1.25 / Tan[c13], 1.25}, {-1.25 / Tan[c13], -1.25},
    HeadCenter -> 0.5, HeadLength -> 0.035, HeadWidth -> 0.75]}},
  Graphics[{{RGBColor[0, 0, 0], Arrow[{-1.25 / Tan[c14 - Pi], -1.25}, {1.25 / Tan[c14 - Pi], 1.25},
    HeadCenter -> 0.5, HeadLength -> 0.035, HeadWidth -> 0.75]}},
  Graphics[{{RGBColor[0, 0, 0], Arrow[{-1.25 / Tan[c15], -1.25}, {1.25 / Tan[c15], 1.25},
    HeadCenter -> 0.5, HeadLength -> 0.035, HeadWidth -> 0.75]}},
  Graphics[{{RGBColor[0, 0, 0], Arrow[{1.25 / Tan[c16], 1.25}, {-1.25 / Tan[c16], -1.25},
    HeadCenter -> 0.5, HeadLength -> 0.035, HeadWidth -> 0.75]}},
  Graphics[{{RGBColor[0, 0, 0], Arrow[{-1.25, -1.25 * Tan[c17]}, {1.25, 1.25 * Tan[c17]},
    HeadCenter -> 0.5, HeadLength -> 0.035, HeadWidth -> 0.75]}},
  AspectRatio -> 1,
  PlotRange -> {{-1.25, 1.25}, {-1.25, 1.25}},
  Frame -> True,
  FrameTicks -> False,
  FrameLabel -> {None, None, None, None},
  GridLines -> {None, None},
  DisplayFunction -> Identity];
p = FullGraphics[p];
p[[1, 2]] = p[[1, 2]] /.
  Text[labely, {b_, c_}, {1., 0.}] ->
  Text[labely, {-1.18, 0}, {0, 0}, {0, 1}];
p6 = Show[p,
  AspectRatio -> 1,
  PlotRange -> All,
  DisplayFunction -> Identity];
Clear[z];

```

(\* CCNA2 and CCNB2 Projected Onto 2 D Subspace \*)

```

stages = {"M/G1", "G1/S", "S", "G2", "G2/M"};
CCNB2 = coordinates[[Position[genenames, "IMAGE:856289"]][[1, 1]]];
CCNA2a = coordinates[[Position[genenames, "IMAGE:950690"]][[1, 1]]];
CCNA2b = coordinates[[Position[genenames, "IMAGE:814270"]][[1, 1]]];

p = Show[{
  Graphics[{RGBColor[0, 0, 0], Text["(g)", {-1, 1.05}]}],
  Graphics[{RGBColor[0, 0, 0], Text["Human", {1.1, -1.05}, {1, 0}]}],
  Graphics[{RGBColor[0, 0, 0], Text["x", {1.13, -0.07}, {1, 0}]}],
  Graphics[{RGBColor[0, 0, 0], Text["y", {-0.055, 1.145}, {0, 1}]}],
  Graphics[{RGBColor[0, 0, 0], Text["M/G1", {-0.825, 0.825}]}],
  Graphics[{RGBColor[0, 0.5, 0], Text["G1/S", {-0.878, -0.81}]}],
  Graphics[{RGBColor[1, 0, 0], Text["G2", {0.88, 0.7}]}],
  Graphics[{RGBColor[1, 0.5, 0], Text["G2/M", {0.3, 1.08}]}],
  Graphics[{RGBColor[0, 0, 1], Text["S", {0.97, -0.52}]}],
  Graphics[
    {RGBColor[0, 0, 1], Dashing[{0.03, 0.02}], {Thickness[0.009], Circle[{0, 0}, 1, {2 * Pi + c16, 2 * Pi}]}},
    {RGBColor[0, 0, 1], Dashing[{0.03, 0.02}],
      {Thickness[0.009], Circle[{0, 0}, 1, {0, c17}]}},
    {RGBColor[1, 0, 0], Dashing[{0.03, 0.02}], {Thickness[0.009], Circle[{0, 0}, 1, {c17, c15}]}},
    {RGBColor[1, 0.5, 0], Dashing[{0.03, 0.02}], {Thickness[0.009], Circle[{0, 0}, 1, {c15, c14}]}},
    {RGBColor[1, 1, 0], Dashing[{0.03, 0.02}],
      {Thickness[0.009], Circle[{0, 0}, 1, {c14, Pi + c17}]}},
    {RGBColor[0, 0.5, 0], Dashing[{0.03, 0.02}],
      {Thickness[0.009], Circle[{0, 0}, 1, {Pi + c17, 2 * Pi + c16}]}},
    {RGBColor[0, 0, 1], Dashing[{0.03, 0.02}],
      {Thickness[0.009], Circle[{0, 0}, 0.5, {2 * Pi + c16, 2 * Pi}]}},
    {RGBColor[0, 0, 1], Dashing[{0.03, 0.02}],
      {Thickness[0.009], Circle[{0, 0}, 0.5, {0, c17}]}},
    {RGBColor[1, 0, 0], Dashing[{0.03, 0.02}], {Thickness[0.009], Circle[{0, 0}, 0.5, {c17, c15}]}},
    {RGBColor[1, 0.5, 0], Dashing[{0.03, 0.02}],
      {Thickness[0.009], Circle[{0, 0}, 0.5, {c15, c14}]}},
    {RGBColor[1, 1, 0], Dashing[{0.03, 0.02}],
      {Thickness[0.009], Circle[{0, 0}, 0.5, {c14, Pi + c17}]}},
    {RGBColor[0, 0.5, 0], Dashing[{0.03, 0.02}],
      {Thickness[0.009], Circle[{0, 0}, 0.5, {Pi + c17, 2 * Pi + c16}]}},
    {RGBColor[1, 0.5, 0], PointSize[0.03], Point[CCNB2]},
    {RGBColor[1, 0.5, 0], Text["CCNB2", CCNB2 + {0.02, -0.15}]},
    {RGBColor[1, 0, 0], PointSize[0.03], Point[CCNA2a]},
    {RGBColor[1, 0, 0], PointSize[0.03], Point[CCNA2b]},
    {RGBColor[1, 0, 0], Text["CCNA2", CCNA2a + {0.23, 0.02}]},
    {RGBColor[1, 0, 0], Text["CCNA2", CCNA2b + {0, 0.1}]},
    {RGBColor[0, 0, 0], Dashing[{0.03, 0.02}], Line[{{0, 1.15}, {0, -1.15}]}},
    {RGBColor[0, 0, 0], Dashing[{0.03, 0.02}], Line[{{1.15, 0}, {-1.15, 0}]}},
  AspectRatio -> 1,
  PlotRange -> {{-1.15, 1.15}, {-1.15, 1.15}},
  Frame -> True,
  FrameTicks -> False,
  FrameLabel -> {None, None, None, None},
  GridLines -> {None, None},
  DisplayFunction -> Identity];
p = FullGraphics[p];
p[[1, 2]] = p[[1, 2]] /.
  Text[labely, {b_, c_}, {1., 0.}] ->
  Text[labely, {-1.18, 0}, {0, 0}, {0, 1}];
C3 = Show[p,
  AspectRatio -> 1,
  PlotRange -> All,
  DisplayFunction -> Identity];

```

(\* Display *S. pombe*, *S. cerevisiae* and Human Arrays & Genes Parametric Plots \*)

```
Show[GraphicsArray[{{g1, g2, g3}}, {t1, t2, t3}], {p4, p5, p6}],
GraphicsSpacing -> 0];
```

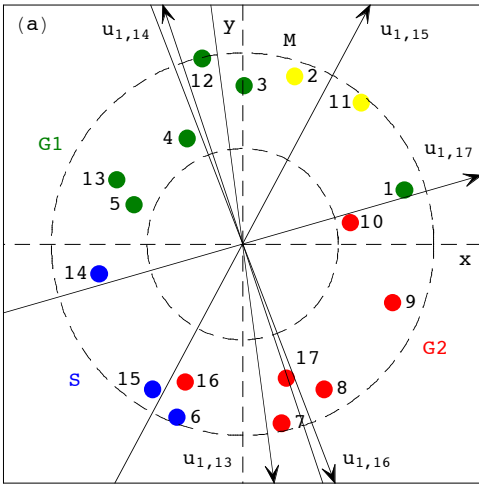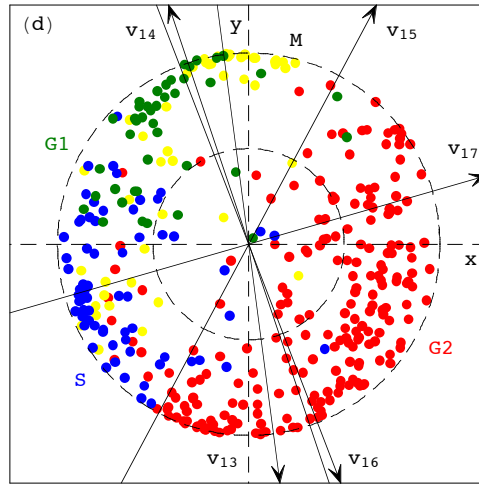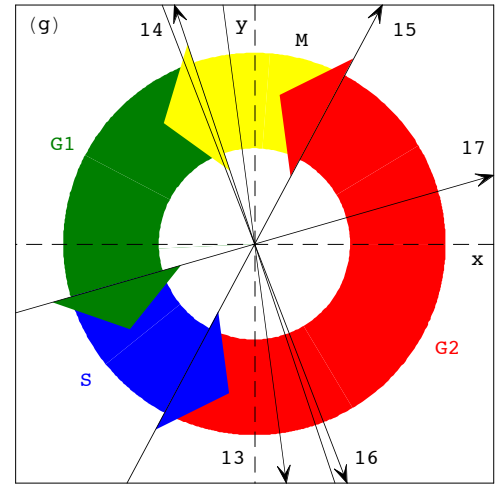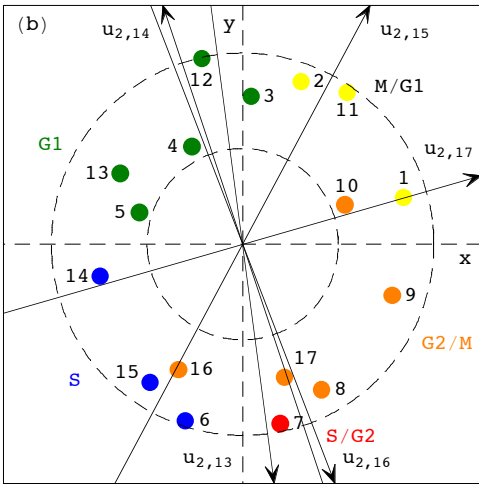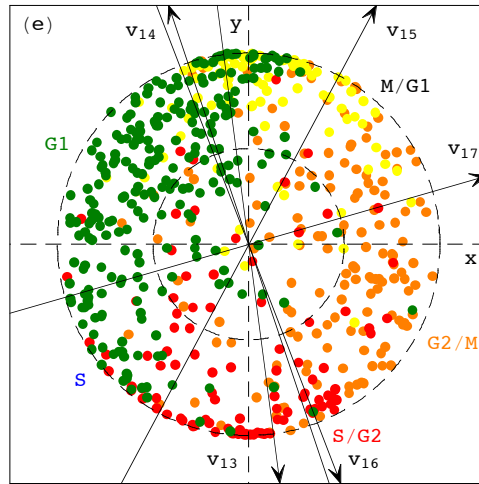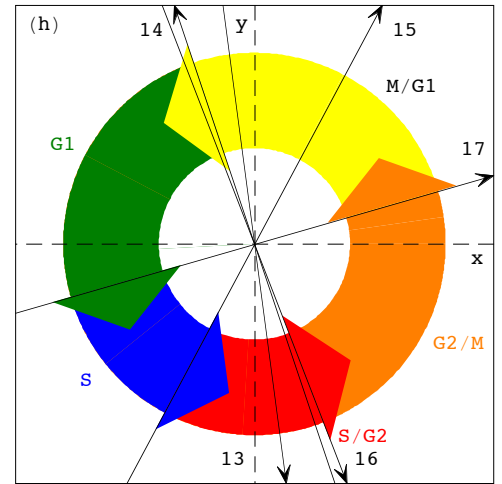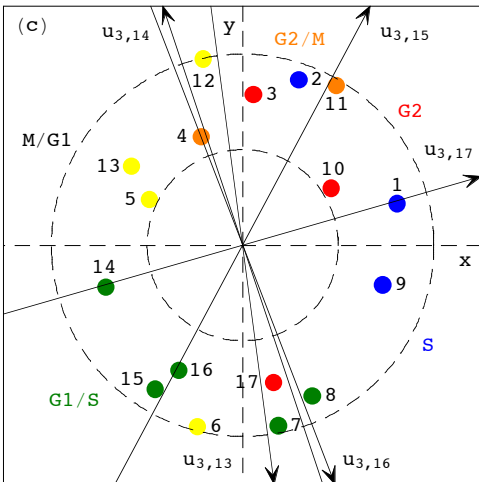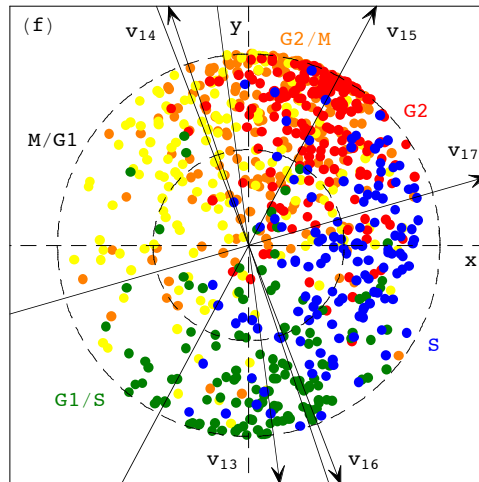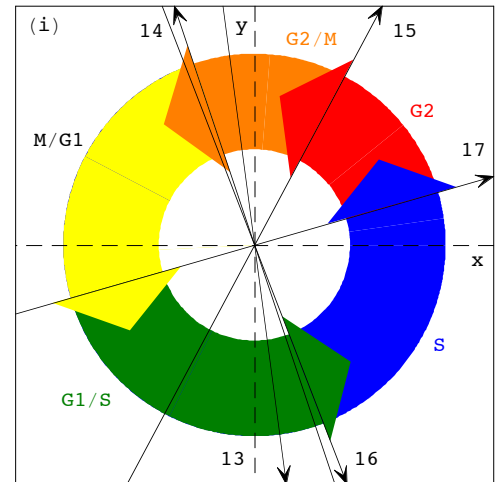

(\* Display Ortholog Projection Parameter Graphs \*)

```
Show[GraphicsArray[{{O1, O2}, {R1, R2}, {C1, C2, C3}}],
GraphicsSpacing -> 0];
```

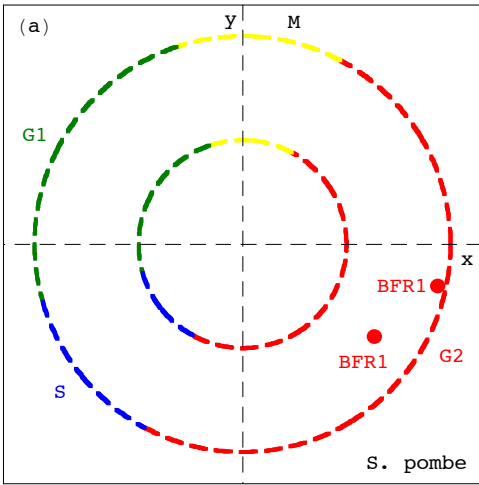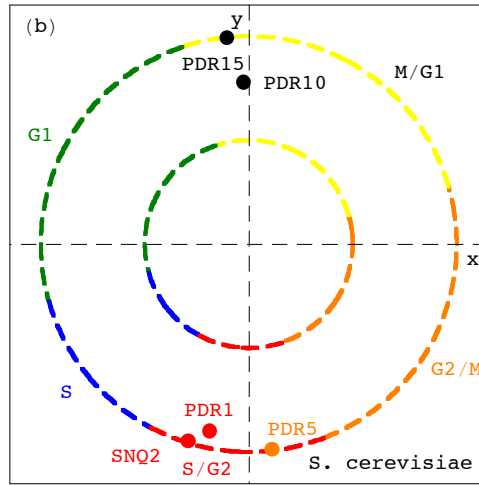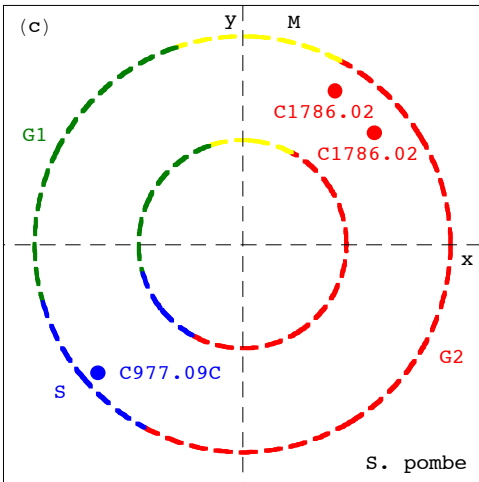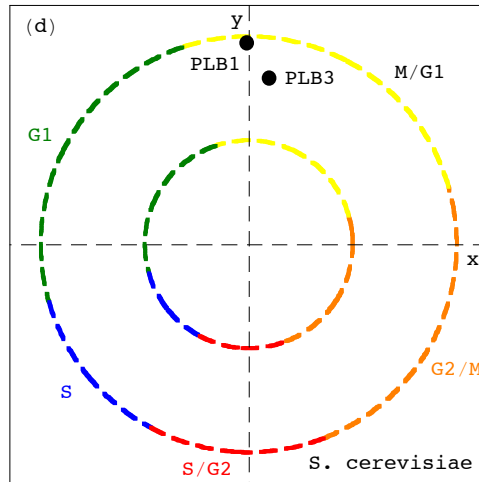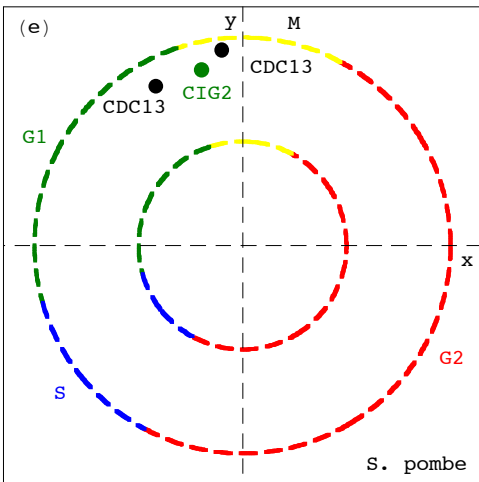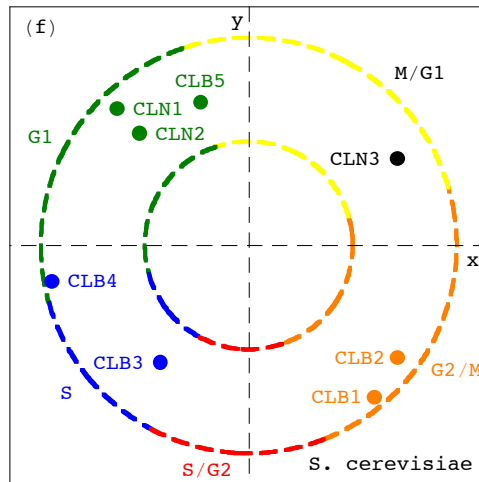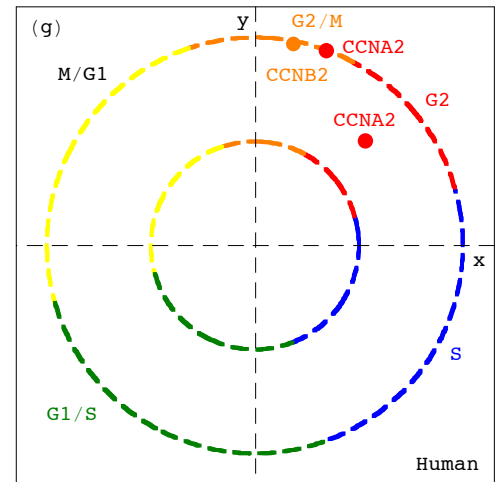

```
(* Reconstruct S. pombe, S. cerevisiae and Human Data in 5 D Common Cell Cycle Subspace *)
```

```
(* Sort S. pombe Genes *)
```

```
matrix = matrix1;  
genes = genes1;  
arraynames = arraynames1;  
genenames = genenames1;
```

```
(* Center Arraylets and Calculate Contributions of Genelets to Genes *)
```

```
centerarraylets = Transpose[arraylets1];  
average = Table[1, {a, 1, genes}];  
average = N[average / Sqrt[Dot[average, average]]];  
centerarraylets = centerarraylets - N[Outer[Times, Dot[centerarraylets, average], average]];  
centerarraylets = Transpose[centerarraylets];  
genecontributions = Transpose[Dot[centerarraylets, d1]];
```

```
(* Project Genes from 5 D Genelets Subspace Onto 2 D Subspace *)
```

```
coordinates = Table[{(Dot[genelets[[13]], x] * genecontributions[[13, a]] +  
  Dot[genelets[[14]], x] * genecontributions[[14, a]] +  
  Dot[genelets[[15]], x] * genecontributions[[15, a]] +  
  Dot[genelets[[16]], x] * genecontributions[[16, a]] +  
  Dot[genelets[[17]], x] * genecontributions[[17, a]]) /  
  Sqrt[(a13 * genecontributions[[13, a]] ^ 2 + (a14 * genecontributions[[14, a]]) ^ 2 +  
  (a15 * genecontributions[[15, a]] ^ 2 + (a16 * genecontributions[[16, a]] ^ 2 +  
  (a17 * genecontributions[[17, a]] ^ 2 +  
  c1314 * Abs[(a13 * genecontributions[[13, a]]) * (a14 * genecontributions[[14, a]])] +  
  c1315 * Abs[(a13 * genecontributions[[13, a]]) * (a15 * genecontributions[[15, a]])] +  
  c1316 * Abs[(a13 * genecontributions[[13, a]]) * (a16 * genecontributions[[16, a]])] +  
  c1317 * Abs[(a13 * genecontributions[[13, a]]) * (a17 * genecontributions[[17, a]])] +  
  c1415 * Abs[(a14 * genecontributions[[14, a]]) * (a15 * genecontributions[[15, a]])] +  
  c1416 * Abs[(a14 * genecontributions[[14, a]]) * (a16 * genecontributions[[16, a]])] +  
  c1417 * Abs[(a14 * genecontributions[[14, a]]) * (a17 * genecontributions[[17, a]])] +  
  c1516 * Abs[(a15 * genecontributions[[15, a]]) * (a16 * genecontributions[[16, a]])] +  
  c1517 * Abs[(a15 * genecontributions[[15, a]]) * (a17 * genecontributions[[17, a]])] +  
  c1617 * Abs[(a16 * genecontributions[[16, a]]) * (a17 * genecontributions[[17, a]])]),  
(Dot[genelets[[13]], y] * genecontributions[[13, a]] +  
  Dot[genelets[[14]], y] * genecontributions[[14, a]] +  
  Dot[genelets[[15]], y] * genecontributions[[15, a]] +  
  Dot[genelets[[16]], y] * genecontributions[[16, a]] +  
  Dot[genelets[[17]], y] * genecontributions[[17, a]]) /  
  Sqrt[(a13 * genecontributions[[13, a]] ^ 2 + (a14 * genecontributions[[14, a]] ^ 2 +  
  (a15 * genecontributions[[15, a]] ^ 2 + (a16 * genecontributions[[16, a]] ^ 2 +  
  (a17 * genecontributions[[17, a]] ^ 2 +  
  c1314 * Abs[(a13 * genecontributions[[13, a]]) * (a14 * genecontributions[[14, a]])] +  
  c1315 * Abs[(a13 * genecontributions[[13, a]]) * (a15 * genecontributions[[15, a]])] +  
  c1316 * Abs[(a13 * genecontributions[[13, a]]) * (a16 * genecontributions[[16, a]])] +  
  c1317 * Abs[(a13 * genecontributions[[13, a]]) * (a17 * genecontributions[[17, a]])] +  
  c1415 * Abs[(a14 * genecontributions[[14, a]]) * (a15 * genecontributions[[15, a]])] +  
  c1416 * Abs[(a14 * genecontributions[[14, a]]) * (a16 * genecontributions[[16, a]])] +  
  c1417 * Abs[(a14 * genecontributions[[14, a]]) * (a17 * genecontributions[[17, a]])] +  
  c1516 * Abs[(a15 * genecontributions[[15, a]]) * (a16 * genecontributions[[16, a]])] +  
  c1517 * Abs[(a15 * genecontributions[[15, a]]) * (a17 * genecontributions[[17, a]])] +  
  c1617 * Abs[(a16 * genecontributions[[16, a]]) * (a17 * genecontributions[[17, a]])]),  
{a, 1, genes}];
```

```
(* Define the Initial Phase *)
```

```
phase = ArcTan[TakeColumns[coordinates, {1}], TakeColumns[coordinates, {2}]] / Degree;  
Do[If[Negative[phase[[a]][[1]]], phase[[a]] = phase[[a]] + 360], {a, 1, genes}]
```

```
(* Sort Genes According to Phases in 2D Subspace *)
```

```
sortmatrix = AppendRows[phase, genenames, matrix];  
sortmatrix = Sort[sortmatrix, OrderedQ[{{#1}, {#2}}] &];
```

```
(* Sorted S. pombe data *)
```

```
phase1 = TakeColumns[sortmatrix, {1, 1}];  
matrix1 = TakeColumns[sortmatrix, {6, arrays + 5}];  
genenames1 = TakeColumns[sortmatrix, {2, 5}];
```

```
(* Sort S. cerevisiae Genes *)
```

```
matrix = matrix2;  
genes = genes2;  
arraynames = arraynames2;  
genenames = genenames2;
```

```
(* Center Arraylets and Calculate Contributions of Genelets to Genes *)
```

```
centerarraylets = Transpose[arraylets2];  
average = Table[1, {a, 1, genes}];  
average = N[average / Sqrt[Dot[average, average]]];  
centerarraylets = centerarraylets - N[Outer[Times, Dot[centerarraylets, average], average]];  
centerarraylets = Transpose[centerarraylets];  
genecontributions = Transpose[Dot[centerarraylets, d2]];
```

(\* Project Genes from 5 D Genelets Subspace Onto 2 D Subspace \*)

```
coordinates = Table[{(Dot[genelets[[13]], x] * genecontributions[[13, a]] +
  Dot[genelets[[14]], x] * genecontributions[[14, a]] +
  Dot[genelets[[15]], x] * genecontributions[[15, a]] +
  Dot[genelets[[16]], x] * genecontributions[[16, a]] +
  Dot[genelets[[17]], x] * genecontributions[[17, a]]) /
  Sqrt[(a13 * genecontributions[[13, a]])^2 + (a14 * genecontributions[[14, a]])^2 +
  (a15 * genecontributions[[15, a]])^2 + (a16 * genecontributions[[16, a]])^2 +
  (a17 * genecontributions[[17, a]])^2 +
  c1314 * Abs[(a13 * genecontributions[[13, a]]) * (a14 * genecontributions[[14, a]])] +
  c1315 * Abs[(a13 * genecontributions[[13, a]]) * (a15 * genecontributions[[15, a]])] +
  c1316 * Abs[(a13 * genecontributions[[13, a]]) * (a16 * genecontributions[[16, a]])] +
  c1317 * Abs[(a13 * genecontributions[[13, a]]) * (a17 * genecontributions[[17, a]])] +
  c1415 * Abs[(a14 * genecontributions[[14, a]]) * (a15 * genecontributions[[15, a]])] +
  c1416 * Abs[(a14 * genecontributions[[14, a]]) * (a16 * genecontributions[[16, a]])] +
  c1417 * Abs[(a14 * genecontributions[[14, a]]) * (a17 * genecontributions[[17, a]])] +
  c1516 * Abs[(a15 * genecontributions[[15, a]]) * (a16 * genecontributions[[16, a]])] +
  c1517 * Abs[(a15 * genecontributions[[15, a]]) * (a17 * genecontributions[[17, a]])] +
  c1617 * Abs[(a16 * genecontributions[[16, a]]) * (a17 * genecontributions[[17, a]])]],
(Dot[genelets[[13]], y] * genecontributions[[13, a]] +
  Dot[genelets[[14]], y] * genecontributions[[14, a]] +
  Dot[genelets[[15]], y] * genecontributions[[15, a]] +
  Dot[genelets[[16]], y] * genecontributions[[16, a]] +
  Dot[genelets[[17]], y] * genecontributions[[17, a]]) /
  Sqrt[(a13 * genecontributions[[13, a]])^2 + (a14 * genecontributions[[14, a]])^2 +
  (a15 * genecontributions[[15, a]])^2 + (a16 * genecontributions[[16, a]])^2 +
  (a17 * genecontributions[[17, a]])^2 +
  c1314 * Abs[(a13 * genecontributions[[13, a]]) * (a14 * genecontributions[[14, a]])] +
  c1315 * Abs[(a13 * genecontributions[[13, a]]) * (a15 * genecontributions[[15, a]])] +
  c1316 * Abs[(a13 * genecontributions[[13, a]]) * (a16 * genecontributions[[16, a]])] +
  c1317 * Abs[(a13 * genecontributions[[13, a]]) * (a17 * genecontributions[[17, a]])] +
  c1415 * Abs[(a14 * genecontributions[[14, a]]) * (a15 * genecontributions[[15, a]])] +
  c1416 * Abs[(a14 * genecontributions[[14, a]]) * (a16 * genecontributions[[16, a]])] +
  c1417 * Abs[(a14 * genecontributions[[14, a]]) * (a17 * genecontributions[[17, a]])] +
  c1516 * Abs[(a15 * genecontributions[[15, a]]) * (a16 * genecontributions[[16, a]])] +
  c1517 * Abs[(a15 * genecontributions[[15, a]]) * (a17 * genecontributions[[17, a]])] +
  c1617 * Abs[(a16 * genecontributions[[16, a]]) * (a17 * genecontributions[[17, a]])]]],
{a, 1, genes}];
```

(\* Define the Initial Phase \*)

```
phase = ArcTan[TakeColumns[coordinates, {1}], TakeColumns[coordinates, {2}]] / Degree;
Do[If[Negative[phase[[a]][[1]]], phase[[a]] = phase[[a]] + 360], {a, 1, genes}]
```

(\* Sort Genes According to Phases in 2 D Subspace \*)

```
sortmatrix = AppendRows[phase, genenames, matrix];
sortmatrix = Sort[sortmatrix, OrderedQ[{{#1}, {#2}}] &];
```

(\* Sorted S. cerevisiae data \*)

```
phase2 = TakeColumns[sortmatrix, {1, 1}];
matrix2 = TakeColumns[sortmatrix, {5, arrays + 4}];
genenames2 = TakeColumns[sortmatrix, {2, 4}];
```



(\* Sort Human Genes \*)

```
matrix = matrix3;  
genes = genes3;  
arraynames = arraynames3;  
genenames = genenames3;
```

(\* Center Arraylets and Calculate Contributions of Genelets to Genes \*)

```
centerarraylets = Transpose[arraylets3];  
average = Table[1, {a, 1, genes}];  
average = N[average / Sqrt[Dot[average, average]]];  
centerarraylets = centerarraylets - N[Outer[Times, Dot[centerarraylets, average], average]];  
centerarraylets = Transpose[centerarraylets];  
genecontributions = Transpose[Dot[centerarraylets, d3]];
```

(\* Project Genes from 5 D Genelets Subspace Onto 2 D Subspace \*)

```
coordinates = Table[{(Dot[genelets[[13]], x] * genecontributions[[13, a]] +  
  Dot[genelets[[14]], x] * genecontributions[[14, a]] +  
  Dot[genelets[[15]], x] * genecontributions[[15, a]] +  
  Dot[genelets[[16]], x] * genecontributions[[16, a]] +  
  Dot[genelets[[17]], x] * genecontributions[[17, a]]) /  
  Sqrt[(a13 * genecontributions[[13, a]] ^ 2 + (a14 * genecontributions[[14, a]]) ^ 2 +  
  (a15 * genecontributions[[15, a]] ^ 2 + (a16 * genecontributions[[16, a]] ^ 2 +  
  (a17 * genecontributions[[17, a]] ^ 2 +  
  c1314 * Abs[(a13 * genecontributions[[13, a]]) * (a14 * genecontributions[[14, a]])] +  
  c1315 * Abs[(a13 * genecontributions[[13, a]]) * (a15 * genecontributions[[15, a]])] +  
  c1316 * Abs[(a13 * genecontributions[[13, a]]) * (a16 * genecontributions[[16, a]])] +  
  c1317 * Abs[(a13 * genecontributions[[13, a]]) * (a17 * genecontributions[[17, a]])] +  
  c1415 * Abs[(a14 * genecontributions[[14, a]]) * (a15 * genecontributions[[15, a]])] +  
  c1416 * Abs[(a14 * genecontributions[[14, a]]) * (a16 * genecontributions[[16, a]])] +  
  c1417 * Abs[(a14 * genecontributions[[14, a]]) * (a17 * genecontributions[[17, a]])] +  
  c1516 * Abs[(a15 * genecontributions[[15, a]]) * (a16 * genecontributions[[16, a]])] +  
  c1517 * Abs[(a15 * genecontributions[[15, a]]) * (a17 * genecontributions[[17, a]])] +  
  c1617 * Abs[(a16 * genecontributions[[16, a]]) * (a17 * genecontributions[[17, a]])]),  
(Dot[genelets[[13]], y] * genecontributions[[13, a]] +  
  Dot[genelets[[14]], y] * genecontributions[[14, a]] +  
  Dot[genelets[[15]], y] * genecontributions[[15, a]] +  
  Dot[genelets[[16]], y] * genecontributions[[16, a]] +  
  Dot[genelets[[17]], y] * genecontributions[[17, a]]) /  
  Sqrt[(a13 * genecontributions[[13, a]] ^ 2 + (a14 * genecontributions[[14, a]]) ^ 2 +  
  (a15 * genecontributions[[15, a]] ^ 2 + (a16 * genecontributions[[16, a]] ^ 2 +  
  (a17 * genecontributions[[17, a]] ^ 2 +  
  c1314 * Abs[(a13 * genecontributions[[13, a]]) * (a14 * genecontributions[[14, a]])] +  
  c1315 * Abs[(a13 * genecontributions[[13, a]]) * (a15 * genecontributions[[15, a]])] +  
  c1316 * Abs[(a13 * genecontributions[[13, a]]) * (a16 * genecontributions[[16, a]])] +  
  c1317 * Abs[(a13 * genecontributions[[13, a]]) * (a17 * genecontributions[[17, a]])] +  
  c1415 * Abs[(a14 * genecontributions[[14, a]]) * (a15 * genecontributions[[15, a]])] +  
  c1416 * Abs[(a14 * genecontributions[[14, a]]) * (a16 * genecontributions[[16, a]])] +  
  c1417 * Abs[(a14 * genecontributions[[14, a]]) * (a17 * genecontributions[[17, a]])] +  
  c1516 * Abs[(a15 * genecontributions[[15, a]]) * (a16 * genecontributions[[16, a]])] +  
  c1517 * Abs[(a15 * genecontributions[[15, a]]) * (a17 * genecontributions[[17, a]])] +  
  c1617 * Abs[(a16 * genecontributions[[16, a]]) * (a17 * genecontributions[[17, a]])]),  
{a, 1, genes}];
```

```
(* Define the Initial Phase *)
```

```
phase = ArcTan[TakeColumns[coordinates, {1}], TakeColumns[coordinates, {2}]] / Degree;  
Do[If[Negative[phase[[a]][[1]]], phase[[a]] = phase[[a]] + 360], {a, 1, genes}]
```

```
(* Sort Genes Accodring to Phases in 2 D Subspace *)
```

```
sortmatrix = AppendRows[phase, genenames, matrix];  
sortmatrix = Sort[sortmatrix, OrderedQ[{{#1}, {#2}}] &];
```

```
(* Sorted Human data *)
```

```
phase3 = TakeColumns[sortmatrix, {1, 1}];  
matrix3 = TakeColumns[sortmatrix, {5, arrays + 4}];  
genenames3 = TakeColumns[sortmatrix, {2, 4}];
```

```
(* Calculate HO GSVD of S. pombe, S. cerevisiae and Human Sorted Data *)
```

```
cor1 = Dot[Transpose[matrix1], matrix1];  
cor2 = Dot[Transpose[matrix2], matrix2];  
cor3 = Dot[Transpose[matrix3], matrix3];  
cor = Dot[cor1, Inverse[cor2]] + Dot[cor2, Inverse[cor1]] + Dot[cor2, Inverse[cor3]] +  
      Dot[cor3, Inverse[cor2]] + Dot[cor1, Inverse[cor3]] + Dot[cor3, Inverse[cor1]];  
{values, vectors} = Eigensystem[cor];  
genelets = vectors;  
Do[genelets[[a]] = genelets[[a]] / Sqrt[Dot[genelets[[a]], genelets[[a]]], {a, 1, arrays}];  
  
arraylets1 = Dot[matrix1, Inverse[genelets]];  
arraylets2 = Dot[matrix2, Inverse[genelets]];  
arraylets3 = Dot[matrix3, Inverse[genelets]];  
arraylets1 = Transpose[arraylets1];  
Do[arraylets1[[a]] = arraylets1[[a]] / Sqrt[Dot[arraylets1[[a]], arraylets1[[a]]], {a, 1, arrays}];  
arraylets1 = Transpose[arraylets1];  
arraylets2 = Transpose[arraylets2];  
Do[arraylets2[[a]] = arraylets2[[a]] / Sqrt[Dot[arraylets2[[a]], arraylets2[[a]]], {a, 1, arrays}];  
arraylets2 = Transpose[arraylets2];  
arraylets3 = Transpose[arraylets3];  
Do[arraylets3[[a]] = arraylets3[[a]] / Sqrt[Dot[arraylets3[[a]], arraylets3[[a]]], {a, 1, arrays}];  
arraylets3 = Transpose[arraylets3];  
d1 = Chop[Dot[PseudoInverse[arraylets1], matrix1, Inverse[genelets]]];  
d2 = Chop[Dot[PseudoInverse[arraylets2], matrix2, Inverse[genelets]]];  
d3 = Chop[Dot[PseudoInverse[arraylets3], matrix3, Inverse[genelets]]];  
genelets13 = Chop[TrigFit[Drop[genelets[[13]], {1}], 2, {t - 1, arrays - 1}], 0.1];  
genelets14 = Chop[TrigFit[Drop[genelets[[14]], {1}], 2, {t - 1, arrays - 1}], 0.1];  
genelets15 = Chop[TrigFit[Drop[genelets[[15]], {1}], 2, {t - 1, arrays - 1}], 0.1];  
genelets16 = Chop[TrigFit[Drop[genelets[[16]], {1}], 2, {t - 1, arrays - 1}], 0];  
genelets17 = Chop[TrigFit[Drop[genelets[[17]], {1}], 2, {t - 1, arrays - 1}], 0];
```

```
(* Display Reconstructed and Sorted S. pombe Data *)
```

```
genes = genes1;  
genenames = genenames1;  
arraynames = arraynames1;
```

```
(* Reconstruct Sorted S. pombe Data *)
```

```
Do[d1[[a, a]] = 0, {a, 1, 12}];  
matrix = Dot[arraylets1, d1, genelets];
```

```
(* Center Reconstructed Sorted S. pombe Data *)
```

```
average = Table[1, {a, 1, arrays}];  
average = N[average / Sqrt[Dot[average, average]]];  
matrix = matrix - N[Outer[Times, Dot[matrix, average], average]];  
matrix = Transpose[matrix];  
average = Table[1, {a, 1, genes}];  
average = N[average / Sqrt[Dot[average, average]]];  
matrix = matrix - N[Outer[Times, Dot[matrix, average], average]];  
matrix = Transpose[matrix];
```

```
(* Classify Gene Phases into Cell Cycle Phases *)
```

```
Do[ If[phase1[[a]][[1]] > c15 / Degree, {endph1 = a - 1; Break[]}], {a, 1, genes}]  
Do[ If[phase1[[a]][[1]] > c14 / Degree, {endph2 = a - 1; Break[]}], {a, 1, genes}]  
Do[ If[phase1[[a]][[1]] > c17 / Degree + 180, {endph3 = a - 1; Break[]}], {a, 1, genes}]  
Do[ If[phase1[[a]][[1]] > c15 / Degree + 180, {endph4 = a - 1; Break[]}], {a, 1, genes}]  
endph5 = genes;
```

```
endph1  
endph2  
endph3  
endph4  
endph5
```

```
507
```

```
917
```

```
1590
```

```
2019
```

```
3167
```

```
(* Create Reconstructed Sorted S. pombe Data 2 D Red & Green Raster Display *)
```

```
contrast = 10 * 1.5;
displaying = Table[
  If[contrast * matrix[[i, j]] > 0,
    If[contrast * matrix[[i, j]] < 1, {contrast * matrix[[i, j]], 0}, {1, 0}],
    If[contrast * matrix[[i, j]] > -1, {0, -contrast * matrix[[i, j]]}, {0, 1}]],
  {i, 1, genes}, {j, 1, arrays}];
framex = Table[{a - 0.5, arraynames[[1, a]]}, {a, 1, arrays}];
framey = {
  {genes - endph1 / 2, "G2"},
  {genes - endph1 - (endph2 - endph1) / 2, "M"},
  {genes - endph2 - (endph3 - endph2) / 2, "G1"},
  {genes - endph3 - (endph4 - endph3) / 2, "S"},
  {genes - endph4 - (endph5 - endph4) / 2, "G2"}];
gridy = {
  {genes - endph1 + 0.5, {RGBColor[0, 0, 0]}},
  {genes - endph2 + 0.5, {RGBColor[0, 0, 0]}},
  {genes - endph3 + 0.5, {RGBColor[0, 0, 0]}},
  {genes - endph4 + 0.5, {RGBColor[0, 0, 0]}},
  {genes - endph5 + 0.5, {RGBColor[0, 0, 0]}}];
labelx = "(a) Arrays";
labely = ColumnForm[{" ", "Genes", " ", " ", " ", " ", " ", " ", " "}, Center];
g = Show[
  Graphics[
    RasterArray[
      Table[
        RGBColor[displaying[[i, j, 1]], displaying[[i, j, 2]], 0],
        {i, genes, 1, -1}, {j, 1, arrays}]]],
  AspectRatio -> 1,
  Frame -> True,
  FrameTicks -> {None, framey, framex, None},
  FrameLabel -> {None, labely, labelx, None},
  GridLines -> {None, gridy},
  DisplayFunction -> Identity];
g = FullGraphics[g];
g[[1, 2]] = g[[1, 2]] /.
  Text[labely, {b_, c_}, {1., 0.}] ->
  Text[labely, {b, c}, {0, 0}, {0, 1}];
g[[1, 2]] = g[[1, 2]] /.
  Text[a_, {b_, c_}, {1., 0.}] ->
  Text[a, {b - 1.5, c}, {0, 0}, {0, 1}];
g[[1, 2]] = g[[1, 2]] /.
  Text[labelx, {b_, c_}, {0., -1.}] ->
  Text[labelx, {b, c + 500}, {0, -1}, {1, 0}];
g[[1, 2]] = g[[1, 2]] /.
  Text[a_, {b_, c_}, {0., -1.}] ->
  Text[a, {b, c}, {0, -1}, {0, 1}];
g1 = Show[g,
  AspectRatio -> GoldenRatio * 1.2,
  PlotRange -> All,
  DisplayFunction -> Identity];
```

```
(* Center Sorted S. pombe Arraylets *)
```

```
arraylets = Transpose[arraylets1];
average = Table[1, {a, 1, genes}];
average = N[average / Sqrt[Dot[average, average]]];
arraylets = arraylets - N[Outer[Times, Dot[arraylets, average], average]];
arraylets = Transpose[arraylets];
```

```
(* Create Sorted S. pombe Arraylets 2 D Red & Green Raster Display *)
```

```
contrast = 75 * 1.5;
displaying = Table[
  If[contrast * arraylets[[i, j]] > 0,
    If[contrast * arraylets[[i, j]] < 1, {contrast * arraylets[[i, j]], 0}, {1, 0}],
    If[contrast * arraylets[[i, j]] > -1, {0, -contrast * arraylets[[i, j]]}, {0, 1}]],
  {i, 1, genes}, {j, 1, arrays}];
labelx = "(b) Arraylets";
labely = ColumnForm[{" ", " ", " ", " ", " ", " ", " ", " ", " ", " "}, Center];
framex = Table[{a - 0.5, ToString[a]}, {a, 1, arrays}];
framey = {
  {genes - endph1 / 2, " "},
  {genes - endph1 - (endph2 - endph1) / 2, " "},
  {genes - endph2 - (endph3 - endph2) / 2, " "},
  {genes - endph3 - (endph4 - endph3) / 2, " "},
  {genes - endph4 - (endph5 - endph4) / 2, " "}};
gridy = {
  {genes - endph1 + 0.5, {RGBColor[0, 0, 0]}},
  {genes - endph2 + 0.5, {RGBColor[0, 0, 0]}},
  {genes - endph3 + 0.5, {RGBColor[0, 0, 0]}},
  {genes - endph4 + 0.5, {RGBColor[0, 0, 0]}},
  {genes - endph5 + 0.5, {RGBColor[0, 0, 0]}};
g = Show[
  Graphics[
    RasterArray[
      Table[
        RGBColor[displaying[[i, j, 1]], displaying[[i, j, 2]], 0],
        {i, genes, 1, -1}, {j, 1, arrays}
      ]],
    AspectRatio -> 1,
    Frame -> True,
    FrameTicks -> {None, framey, framex, None},
    FrameLabel -> {None, labely, labelx, None},
    GridLines -> {None, gridy},
    DisplayFunction -> Identity];
g = FullGraphics[g];
g[[1, 2]] = g[[1, 2]] /.
  Text[labely, {b_, c_}, {1., 0.}] ->
  Text[labely, {b, c}, {0, 0}, {0, 1}];
g[[1, 2]] = g[[1, 2]] /.
  Text[a_, {b_, c_}, {1., 0.}] ->
  Text[a, {b - 1.5, c}, {0, 0}, {0, 1}];
g[[1, 2]] = g[[1, 2]] /.
  Text[labelx, {b_, c_}, {0., -1.}] ->
  Text[labelx, {b, c + 500}, {0, -1}, {1, 0}];
g[[1, 2]] = g[[1, 2]] /.
  Text[a_, {b_, c_}, {0., -1.}] ->
  Text[a, {b, c}, {0, -1}, {0, 1}];
g2 = Show[g,
  AspectRatio -> GoldenRatio * 1.2,
  PlotRange -> All,
  DisplayFunction -> Identity];
```

```
(* Create Selected Sorted S. pombe Arraylets Graph Display *)
```

```
arraylets = Transpose[arraylets1];
arraylets13 = Chop[TrigFit[arraylets[[13]], 1, {t, genes - 1}], 0.001];
arraylets14 = Chop[TrigFit[arraylets[[14]], 1, {t, genes - 1}], 0.001];
arraylets15 = Chop[TrigFit[arraylets[[15]], 1, {t, genes - 1}], 0.001];
arraylets16 = Chop[TrigFit[arraylets[[16]], 1, {t, genes - 1}], 0.001];
arraylets17 = Chop[TrigFit[arraylets[[17]], 1, {t, genes - 1}], 0.001];
```

```

p = Table[0, {5}];
color =
  {RGBColor[1, 0, 0], RGBColor[0, 0, 1], RGBColor[0, 0.5, 0], RGBColor[1, 0.5, 0], RGBColor[0.75, 0, 1]};
framex = {{0, "0      "}, {0.06, "0.06  "}, {0.12, "0.12  "}, {0.18, "0.18  "}, {0.24, "0.24  "}};
labelx = "(c) Expression Level";
labely = ColumnForm[{" ", " ", " ", " ", " ", " ", " ", " ", " ", " "}, Center];
flag = 0;
FittedArraylets = {arraylets13, arraylets14, arraylets15, arraylets16, arraylets17};
offset = {0, 0.025, 0.05, 0.075, 0.1};

Do[{
  graph = ParametricPlot[{FittedArraylets[[n]] + offset[[n]] * 2.4, -t},
    {t, 0, genes - 1},
    PlotStyle -> {RGBColor[0, 0, 0], Thickness[0.016]},
    DisplayFunction -> Identity},
  coordinates = Table[
    If[arraylets[[12 + n, a]] + offset[[n]] * 2.4 > 0.125 * 2.4, 0.125 * 2.4,
      If[arraylets[[12 + n, a]] + offset[[n]] * 2.4 < -0.025 * 2.4, -0.025 * 2.4,
        arraylets[[12 + n, a]] + offset[[n]] * 2.4]],
    {a, 1, genes}],
  coordinates = Table[{coordinates[[a]], -a + 1}, {a, 1, genes}],
  line = Line[coordinates],
  g = Show[{
    Graphics[{color[[n]], line}],
    graph},
  If[flag == 0,
    {FrameLabel -> {None, labely, labelx, None},
      FrameTicks -> {None, framey, framex, None}},
    {FrameLabel -> {None, None, None, None},
      FrameTicks -> {None, None, None, None}}],
  Frame -> True,
  GridLines -> {{offset[[n]] * 2.4, RGBColor[0, 0, 0]}, None},
  AspectRatio -> GoldenRatio * 1.15,
  PlotRange -> {{-0.025 * 2.4, 0.125 * 2.4}, {85, -genes + 1 - 85}},
  DisplayFunction -> Identity],
  g = FullGraphics[g],
  g[[1, 2]] = g[[1, 2]] /.
  Text[labely, {b_, c_}, {1., 0.}] ->
  Text[labely, {b, c}, {0, 0}, {0, 1}],
  g[[1, 2]] = g[[1, 2]] /.
  Text[a_, {b_, c_}, {1., 0.}] ->
  Text[a, {b - 0.01, c}, {0, 0}, {0, 1}],
  g[[1, 2]] = g[[1, 2]] /.
  Text[labelx, {b_, c_}, {0., -1.}] ->
  Text[labelx, {b, c + 525}, {0, -1}, {1, 0}],
  g[[1, 2]] = g[[1, 2]] /.
  Text[a_, {b_, c_}, {0., -1.}] ->
  Text[a, {b, c}, {0, -1}, {0, 1}],
  flag = flag + 1,
  p[[n]] = Show[g,
    AspectRatio -> GoldenRatio * 1.29,
    PlotRange -> All,
    DisplayFunction -> Identity]],
{n, 1, 5}]

(* Display Selected Sorted S. pombe Arraylets *)

g3 = Show[{p[[5]], p[[4]], p[[3]], p[[2]], p[[1]]},
  DisplayFunction -> Identity];

```

(\* Display Reconstructed Sorted S. pombe Data, Arraylets and Selected Arraylets \*)

```
Show[GraphicsArray[{g1, g2, g3}],  
GraphicsSpacing -> -0.2];
```

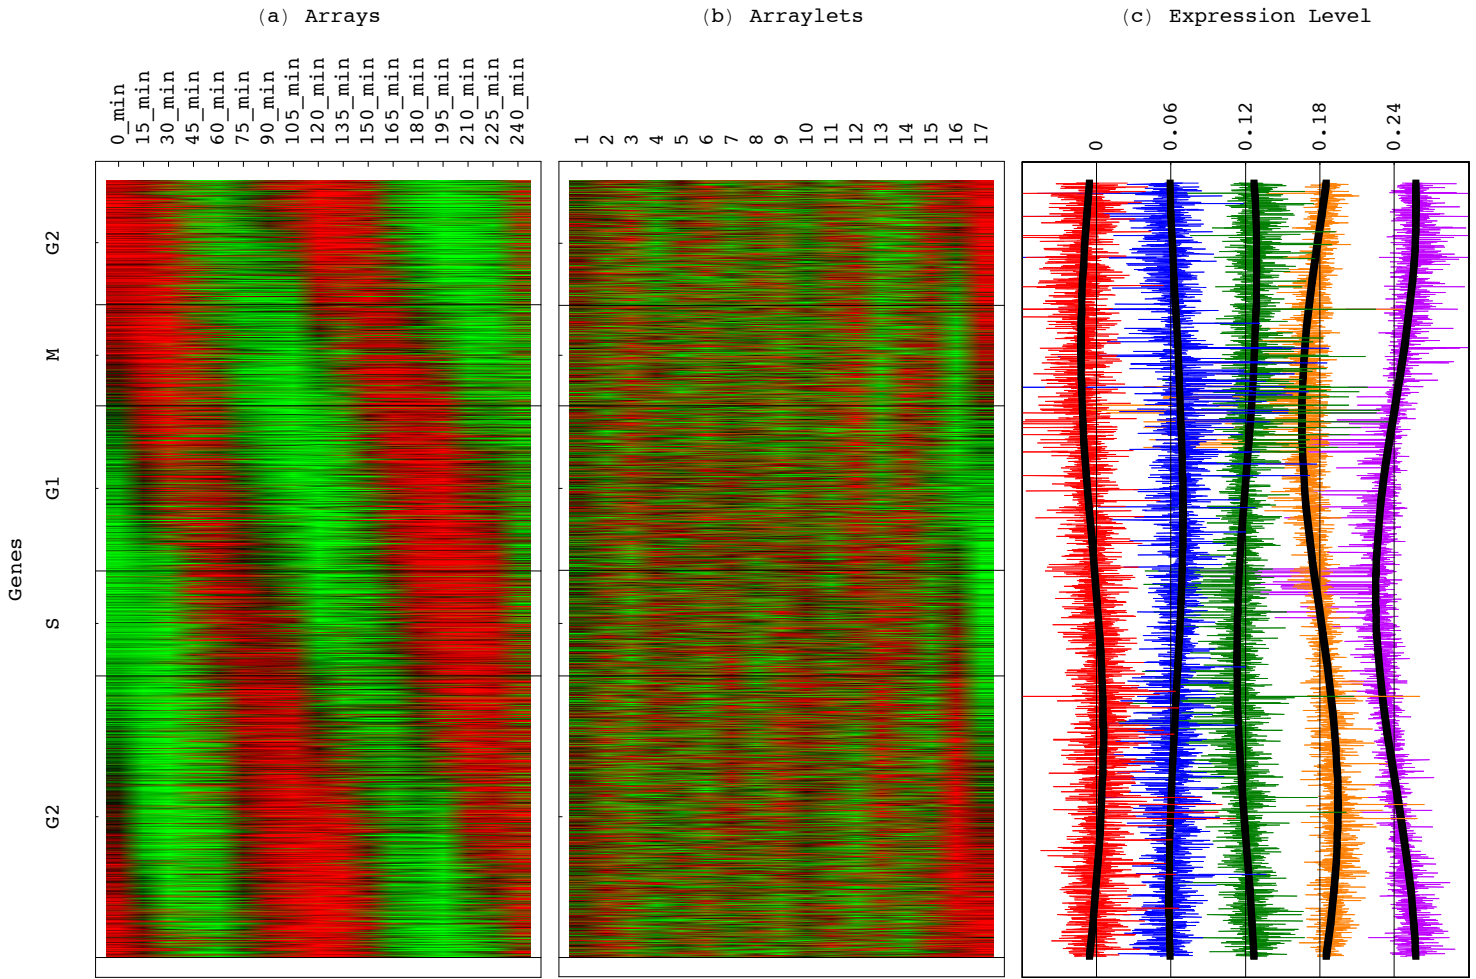

```
(* Display Reconstructed and Sorted S. cerevisiae Data *)
```

```
genes = genes2;  
genenames = genenames2;  
arraynames = arraynames2;
```

```
(* Reconstruct Sorted S. cerevisiae Data *)
```

```
Do[d2[[a, a]] = 0, {a, 1, 12}];  
matrix = Dot[arraylets2, d2, genelets];
```

```
(* Center Reconstructed Sorted S. cerevisiae Data *)
```

```
average = Table[1, {a, 1, arrays}];  
average = N[average / Sqrt[Dot[average, average]]];  
matrix = matrix - N[Outer[Times, Dot[matrix, average], average]];  
matrix = Transpose[matrix];  
average = Table[1, {a, 1, genes}];  
average = N[average / Sqrt[Dot[average, average]]];  
matrix = matrix - N[Outer[Times, Dot[matrix, average], average]];  
matrix = Transpose[matrix];
```

```
(* Classify Gene Phases into Cell Cycle Phases *)
```

```
Do[ If[phase2[[a]][[1]] > c17 / Degree, {endph1 = a - 1; Break[]}], {a, 1, genes}]  
Do[ If[phase2[[a]][[1]] > c14 / Degree, {endph2 = a - 1; Break[]}], {a, 1, genes}]  
Do[ If[phase2[[a]][[1]] > c17 / Degree + 180, {endph3 = a - 1; Break[]}], {a, 1, genes}]  
Do[ If[phase2[[a]][[1]] > c15 / Degree + 180, {endph4 = a - 1; Break[]}], {a, 1, genes}]  
Do[ If[phase2[[a]][[1]] > c16 / Degree + 360, {endph5 = a - 1; Break[]}], {a, 1, genes}]  
endph6 = genes;
```

```
endph1  
endph2  
endph3  
endph4  
endph5  
endph6
```

```
151
```

```
1393
```

```
2354
```

```
2883
```

```
3696
```

```
4772
```



(\* Create Reconstructed Sorted *S. cerevisiae* Data 2 D Red & Green Raster Display \*)

```
contrast = 10 * 1.5;
displaying = Table[
  If[contrast * matrix[[i, j]] > 0,
    If[contrast * matrix[[i, j]] < 1, {contrast * matrix[[i, j]], 0}, {1, 0}],
    If[contrast * matrix[[i, j]] > -1, {0, -contrast * matrix[[i, j]]}, {0, 1}]],
  {i, 1, genes}, {j, 1, arrays}];
framex = Table[{a - 0.5, arraynames[[1, a]]}, {a, 1, arrays}];
framey = {
  {genes - endph1 / 2, "G2/M"},
  {genes - endph1 - (endph2 - endph1) / 2, "M/G1"},
  {genes - endph2 - (endph3 - endph2) / 2, "G1"},
  {genes - endph3 - (endph4 - endph3) / 2, "S"},
  {genes - endph4 - (endph5 - endph4) / 2, "S/G2"},
  {genes - endph5 - (endph6 - endph5) / 2, "G2/M"}];
gridy = {
  {genes - endph1 + 0.5, {RGBColor[0, 0, 0]}},
  {genes - endph2 + 0.5, {RGBColor[0, 0, 0]}},
  {genes - endph3 + 0.5, {RGBColor[0, 0, 0]}},
  {genes - endph4 + 0.5, {RGBColor[0, 0, 0]}},
  {genes - endph5 + 0.5, {RGBColor[0, 0, 0]}},
  {genes - endph6 + 0.5, {RGBColor[0, 0, 0]}}];
labelx = "(a) Arrays";
labely = ColumnForm[{" ", "Genes", " ", " ", " ", " ", " ", " ", " "}, Center];
g = Show[
  Graphics[
    RasterArray[
      Table[
        RGBColor[displaying[[i, j, 1]], displaying[[i, j, 2]], 0],
        {i, genes, 1, -1}, {j, 1, arrays}]]],
  AspectRatio -> 1,
  Frame -> True,
  FrameTicks -> {None, framey, framex, None},
  FrameLabel -> {None, labely, labelx, None},
  GridLines -> {None, gridy},
  DisplayFunction -> Identity];
g = FullGraphics[g];
g[[1, 2]] = g[[1, 2]] /.
  Text[labely, {b_, c_}, {1., 0.}] ->
  Text[labely, {b, c}, {0, 0}, {0, 1}];
g[[1, 2]] = g[[1, 2]] /.
  Text[a_, {b_, c_}, {1., 0.}] ->
  Text[a, {b - 1.5, c}, {0, 0}, {0, 1}];
g[[1, 2]] = g[[1, 2]] /.
  Text[labelx, {b_, c_}, {0., -1.}] ->
  Text[labelx, {b, c + 600}, {0, -1}, {1, 0}];
g[[1, 2]] = g[[1, 2]] /.
  Text[a_, {b_, c_}, {0., -1.}] ->
  Text[a, {b, c}, {0, -1}, {0, 1}];
g4 = Show[g,
  AspectRatio -> GoldenRatio * 1.4,
  PlotRange -> All,
  DisplayFunction -> Identity];
```

(\* Center Sorted *S. cerevisiae* Arraylets \*)

```
arraylets = Transpose[arraylets2];
average = Table[1, {a, 1, genes}];
average = N[average / Sqrt[Dot[average, average]]];
arraylets = arraylets - N[Outer[Times, Dot[arraylets, average], average]];
arraylets = Transpose[arraylets];
```

(\* Create Sorted *S. cerevisiae* Arraylets 2D Red & Green Raster Display \*)

```

contrast = 75 * 1.5;
displaying = Table[
  If[contrast * arraylets[[i, j]] > 0,
    If[contrast * arraylets[[i, j]] < 1, {contrast * arraylets[[i, j]], 0}, {1, 0}],
    If[contrast * arraylets[[i, j]] > -1, {0, -contrast * arraylets[[i, j]]}, {0, 1}]],
  {i, 1, genes}, {j, 1, arrays}];
labelx = "(b) Arraylets";
labely = ColumnForm[{" ", " ", " ", " ", " ", " ", " ", " ", " ", " "}, Center];
framey = {
  {genes - endph1 / 2, " "},
  {genes - endph1 - (endph2 - endph1) / 2, " "},
  {genes - endph2 - (endph3 - endph2) / 2, " "},
  {genes - endph3 - (endph4 - endph3) / 2, " "},
  {genes - endph4 - (endph5 - endph4) / 2, " "},
  {genes - endph5 - (endph6 - endph5) / 2, " "}};
gridy = {
  {genes - endph1 + 0.5, {RGBColor[0, 0, 0]}},
  {genes - endph2 + 0.5, {RGBColor[0, 0, 0]}},
  {genes - endph3 + 0.5, {RGBColor[0, 0, 0]}},
  {genes - endph4 + 0.5, {RGBColor[0, 0, 0]}},
  {genes - endph5 + 0.5, {RGBColor[0, 0, 0]}},
  {genes - endph6 + 0.5, {RGBColor[0, 0, 0]}}};
framex = Table[{a - 0.5, ToString[a]}, {a, 1, arrays}];
g = Show[
  Graphics[
    RasterArray[
      Table[
        RGBColor[displaying[[i, j, 1]], displaying[[i, j, 2]], 0],
        {i, genes, 1, -1}, {j, 1, arrays}
      ]],
    AspectRatio -> 1,
    Frame -> True,
    FrameTicks -> {None, framey, framex, None},
    FrameLabel -> {None, labely, labelx, None},
    GridLines -> {None, gridy},
    DisplayFunction -> Identity];
g = FullGraphics[g];
g[[1, 2]] = g[[1, 2]] /.
  Text[labely, {b_, c_}, {1., 0.}] ->
  Text[labely, {b, c}, {0, 0}, {0, 1}];
g[[1, 2]] = g[[1, 2]] /.
  Text[a_, {b_, c_}, {1., 0.}] ->
  Text[a, {b - 1.5, c}, {0, 0}, {0, 1}];
g[[1, 2]] = g[[1, 2]] /.
  Text[labelx, {b_, c_}, {0., -1.}] ->
  Text[labelx, {b, c + 600}, {0, -1}, {1, 0}];
g[[1, 2]] = g[[1, 2]] /.
  Text[a_, {b_, c_}, {0., -1.}] ->
  Text[a, {b, c}, {0, -1}, {0, 1}];
g5 = Show[g,
  AspectRatio -> GoldenRatio * 1.4,
  PlotRange -> All,
  DisplayFunction -> Identity];

```

(\* Create Selected Sorted *S. cerevisiae* Arraylets Graph Display \*)

```

arraylets = Transpose[arraylets2];
arraylets13 = Chop[TrigFit[arraylets[[13]], 1, {t, genes - 1}], 0.001];
arraylets14 = Chop[TrigFit[arraylets[[14]], 1, {t, genes - 1}], 0.001];
arraylets15 = Chop[TrigFit[arraylets[[15]], 1, {t, genes - 1}], 0.001];
arraylets16 = Chop[TrigFit[arraylets[[16]], 1, {t, genes - 1}], 0.001];
arraylets17 = Chop[TrigFit[arraylets[[17]], 1, {t, genes - 1}], 0.001];

```

```

p = Table[0, {5}];
color =
  {RGBColor[1, 0, 0], RGBColor[0, 0, 1], RGBColor[0, 0.5, 0], RGBColor[1, 0.5, 0], RGBColor[0.75, 0, 1]};
framex = {{0, "0"}, {0.05, "0.05"}, {0.10, "0.10"}, {0.15, "0.15"}, {0.20, "0.20"};
labelx = "(c) Expression Level";
labely = ColumnForm[{"", "", "", "", "", "", "", "", "", ""], Center];
flag = 0;
FittedArraylets = {arraylets13, arraylets14, arraylets15, arraylets16, arraylets17};
offset = {0, 0.025, 0.05, 0.075, 0.1};

Do[{
  graph = ParametricPlot[{FittedArraylets[[n]] + offset[[n]] * 2.0, -t},
    {t, 0, genes - 1},
    PlotStyle -> {RGBColor[0, 0, 0], Thickness[0.016]},
    DisplayFunction -> Identity],
  coordinates = Table[
    If[arraylets[[12 + n, a]] + offset[[n]] * 2.0 > 0.125 * 2.0, 0.125 * 2.0,
      If[arraylets[[12 + n, a]] + offset[[n]] * 2.0 < -0.025 * 2.0,
        -0.025 * 2.0, arraylets[[12 + n, a]] + offset[[n]] * 2.0]],
    {a, 1, genes}],
  coordinates = Table[{coordinates[[a]], -a + 1}, {a, 1, genes}],
  line = Line[coordinates],
  g = Show[{
    Graphics[{color[[n]], line}],
    graph},
  If[flag == 0,
    {FrameLabel -> {None, labely, labelx, None},
      FrameTicks -> {None, framey, framex, None}},
    {FrameLabel -> {None, None, None, None},
      FrameTicks -> {None, None, None, None}}],
  Frame -> True,
  GridLines -> {{offset[[n]] * 2.0, RGBColor[0, 0, 0]}, None},
  AspectRatio -> GoldenRatio * 1.15,
  PlotRange -> {{-0.025 * 2.0, 0.125 * 2.0}, {135, -genes + 1 - 130}},
  DisplayFunction -> Identity],
  g = FullGraphics[g],
  g[[1, 2]] = g[[1, 2]] /.
  Text[labely, {b_, c_}, {1., 0.}] ->
  Text[labely, {b, c}, {0, 0}, {0, 1}],
  g[[1, 2]] = g[[1, 2]] /.
  Text[a_, {b_, c_}, {1., 0.}] ->
  Text[a, {b - 0.01, c}, {0, 0}, {0, 1}],
  g[[1, 2]] = g[[1, 2]] /.
  Text[labelx, {b_, c_}, {0., -1.}] ->
  Text[labelx, {b, c + 635}, {0, -1}, {1, 0}],
  g[[1, 2]] = g[[1, 2]] /.
  Text[a_, {b_, c_}, {0., -1.}] ->
  Text[a, {b, c}, {0, -1}, {0, 1}],
  flag = flag + 1,
  p[[n]] = Show[g,
    AspectRatio -> GoldenRatio * 1.5025,
    PlotRange -> All,
    DisplayFunction -> Identity]],
{n, 1, 5}]

(* Display Selected Sorted S. cerevisiae Arraylets *)

g6 = Show[{p[[5]], p[[4]], p[[3]], p[[2]], p[[1]]},
  DisplayFunction -> Identity];

```

(\* Display Reconstructed Sorted S. cerevisiae Data, Arraylets and Selected Arraylets \*)

```
Show[GraphicsArray[{g4, g5, g6}],  
GraphicsSpacing -> -0.2];
```

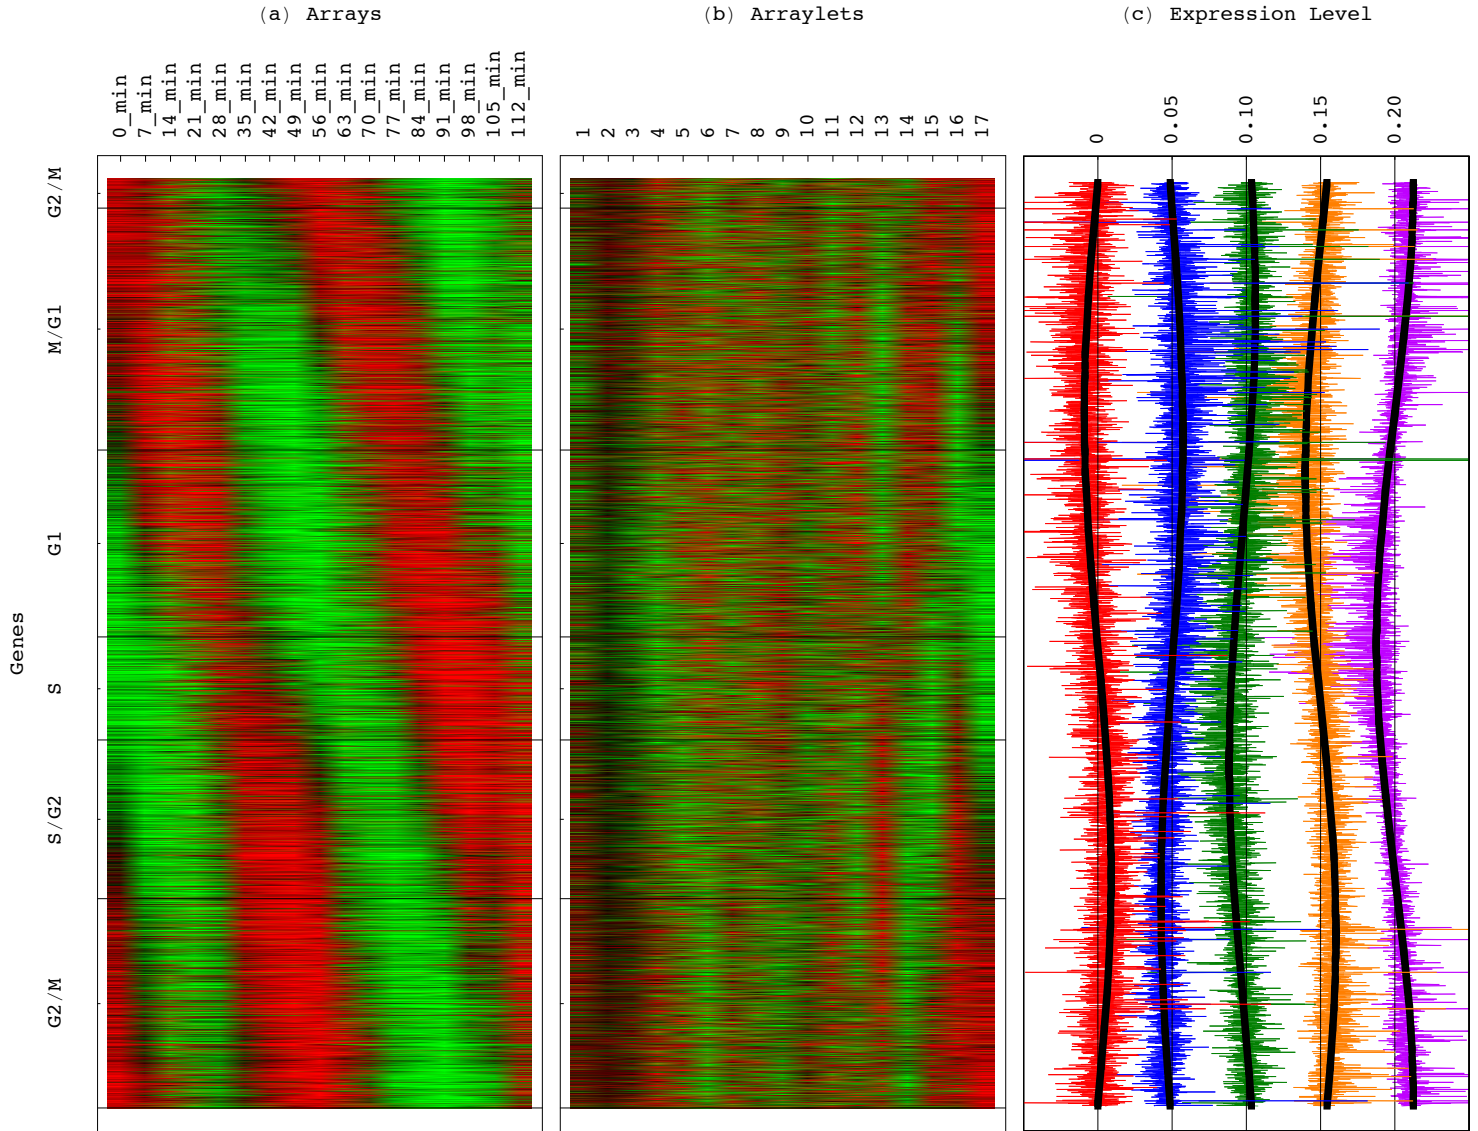

(\* Display Reconstructed and Sorted Human Data \*)

```
genes = genes3;  
genenames = genenames3;  
arraynames = arraynames3;
```

(\* Reconstruct Sorted Human Data \*)

```
Do[d3[[a, a]] = 0, {a, 1, 12}];  
matrix = Dot[arraylets3, d3, genelets];
```

(\* Center Reconstructed Sorted Human Data \*)

```
average = Table[1, {a, 1, arrays}];  
average = N[average / Sqrt[Dot[average, average]]];  
matrix = matrix - N[Outer[Times, Dot[matrix, average], average]];  
matrix = Transpose[matrix];  
average = Table[1, {a, 1, genes}];  
average = N[average / Sqrt[Dot[average, average]]];  
matrix = matrix - N[Outer[Times, Dot[matrix, average], average]];  
matrix = Transpose[matrix];
```

(\* Classify Gene Phases into Cell Cycle Phases \*)

```
Do[ If[phase3[[a]][[1]] > c17 / Degree, {endph1 = a - 1; Break[]}], {a, 1, genes}]  
Do[ If[phase3[[a]][[1]] > c15 / Degree, {endph2 = a - 1; Break[]}], {a, 1, genes}]  
Do[ If[phase3[[a]][[1]] > c14 / Degree, {endph3 = a - 1; Break[]}], {a, 1, genes}]  
Do[ If[phase3[[a]][[1]] > c17 / Degree + 180, {endph4 = a - 1; Break[]}], {a, 1, genes}]  
Do[ If[phase3[[a]][[1]] > c16 / Degree + 360, {endph5 = a - 1; Break[]}], {a, 1, genes}]  
endph6 = genes;
```

```
endph1  
endph2  
endph3  
endph4  
endph5  
endph6
```

473

2070

3977

6661

10763

13068

(\* Create Reconstructed Sorted Human Data 2D Red & Green Raster Display \*)

```
contrast = 10 * 1.5;
displaying = Table[
  If[contrast * matrix[[i, j]] > 0,
    If[contrast * matrix[[i, j]] < 1, {contrast * matrix[[i, j]], 0}, {1, 0}],
    If[contrast * matrix[[i, j]] > -1, {0, -contrast * matrix[[i, j]]}, {0, 1}]],
  {i, 1, genes}, {j, 1, arrays}];
framex = Table[{a - 0.5, arraynames[[1, a]]}, {a, 1, arrays}];
framey = {
  {genes - endph1 / 2, "S"},
  {genes - endph1 - (endph2 - endph1) / 2, "G2"},
  {genes - endph2 - (endph3 - endph2) / 2, "G2/M"},
  {genes - endph3 - (endph4 - endph3) / 2, "M/G1"},
  {genes - endph4 - (endph5 - endph4) / 2, "G1/S"},
  {genes - endph5 - (endph6 - endph5) / 2, "S"}];
gridy = {
  {genes - endph1 + 0.5, {RGBColor[0, 0, 0]}},
  {genes - endph2 + 0.5, {RGBColor[0, 0, 0]}},
  {genes - endph3 + 0.5, {RGBColor[0, 0, 0]}},
  {genes - endph4 + 0.5, {RGBColor[0, 0, 0]}},
  {genes - endph5 + 0.5, {RGBColor[0, 0, 0]}},
  {genes - endph6 + 0.5, {RGBColor[0, 0, 0]}}];
labelx = "(a) Arrays";
labely = ColumnForm[{" ", "Genes", " ", " ", " ", " ", " ", " ", " "}, Center];
g = Show[
  Graphics[
    RasterArray[
      Table[
        RGBColor[displaying[[i, j, 1]], displaying[[i, j, 2]], 0],
        {i, genes, 1, -1}, {j, 1, arrays}]]],
  AspectRatio -> 1,
  Frame -> True,
  FrameTicks -> {None, framey, framex, None},
  FrameLabel -> {None, labely, labelx, None},
  GridLines -> {None, gridy},
  DisplayFunction -> Identity];
g = FullGraphics[g];
g[[1, 2]] = g[[1, 2]] /.
  Text[labely, {b_, c_}, {1., 0.}] ->
  Text[labely, {b, c}, {0, 0}, {0, 1}];
g[[1, 2]] = g[[1, 2]] /.
  Text[a_, {b_, c_}, {1., 0.}] ->
  Text[a, {b - 1.5, c}, {0, 0}, {0, 1}];
g[[1, 2]] = g[[1, 2]] /.
  Text[labelx, {b_, c_}, {0., -1.}] ->
  Text[labelx, {b, c + 1000}, {0, -1}, {1, 0}];
g[[1, 2]] = g[[1, 2]] /.
  Text[a_, {b_, c_}, {0., -1.}] ->
  Text[a, {b, c}, {0, -1}, {0, 1}];
g7 = Show[g,
  AspectRatio -> GoldenRatio * 2,
  PlotRange -> All,
  DisplayFunction -> Identity];
```

(\* Center Sorted Human Arraylets \*)

```
arraylets = Transpose[arraylets3];
average = Table[1, {a, 1, genes}];
average = N[average / Sqrt[Dot[average, average]]];
arraylets = arraylets - N[Outer[Times, Dot[arraylets, average], average]];
arraylets = Transpose[arraylets];
```

(\* Create Sorted Human Arraylets 2 D Red & Green Raster Display \*)

```
contrast = 75 * 1.5;
displaying = Table[
  If[contrast * arraylets[[i, j]] > 0,
    If[contrast * arraylets[[i, j]] < 1, {contrast * arraylets[[i, j]], 0}, {1, 0}],
    If[contrast * arraylets[[i, j]] > -1, {0, -contrast * arraylets[[i, j]]}, {0, 1}]],
  {i, 1, genes}, {j, 1, arrays}];
labelx = "(b) Arraylets";
labely = ColumnForm[{" ", " ", " ", " ", " ", " ", " ", " ", " ", " "}, Center];
framey = {
  {genes - endph1 / 2, " "},
  {genes - endph1 - (endph2 - endph1) / 2, " "},
  {genes - endph2 - (endph3 - endph2) / 2, " "},
  {genes - endph3 - (endph4 - endph3) / 2, " "},
  {genes - endph4 - (endph5 - endph4) / 2, " "},
  {genes - endph5 - (endph6 - endph5) / 2, " "}};
gridy = {
  {genes - endph1 + 0.5, {RGBColor[0, 0, 0]}},
  {genes - endph2 + 0.5, {RGBColor[0, 0, 0]}},
  {genes - endph3 + 0.5, {RGBColor[0, 0, 0]}},
  {genes - endph4 + 0.5, {RGBColor[0, 0, 0]}},
  {genes - endph5 + 0.5, {RGBColor[0, 0, 0]}},
  {genes - endph6 + 0.5, {RGBColor[0, 0, 0]}}};
framex = Table[{a - 0.5, ToString[a]}, {a, 1, arrays}];
g = Show[
  Graphics[
    RasterArray[
      Table[
        RGBColor[displaying[[i, j, 1]], displaying[[i, j, 2]], 0],
        {i, genes, 1, -1}, {j, 1, arrays}
      ]],
    AspectRatio -> 1,
    Frame -> True,
    FrameTicks -> {None, framey, framex, None},
    FrameLabel -> {None, labely, labelx, None},
    GridLines -> {None, gridy},
    DisplayFunction -> Identity];
g = FullGraphics[g];
g[[1, 2]] = g[[1, 2]] /.
  Text[labely, {b_, c_}, {1., 0.}] ->
  Text[labely, {b, c}, {0, 0}, {0, 1}];
g[[1, 2]] = g[[1, 2]] /.
  Text[a_, {b_, c_}, {1., 0.}] ->
  Text[a, {b - 1.5, c}, {0, 0}, {0, 1}];
g[[1, 2]] = g[[1, 2]] /.
  Text[labelx, {b_, c_}, {0., -1.}] ->
  Text[labelx, {b, c + 1000}, {0, -1}, {1, 0}];
g[[1, 2]] = g[[1, 2]] /.
  Text[a_, {b_, c_}, {0., -1.}] ->
  Text[a, {b, c}, {0, -1}, {0, 1}];
g8 = Show[g,
  AspectRatio -> GoldenRatio * 2,
  PlotRange -> All,
  DisplayFunction -> Identity];
```

(\* Create Selected Sorted Human Arraylets Graph Display \*)

```
arraylets = Transpose[arraylets3];
arraylets13 = Chop[TrigFit[arraylets[[13]], 1, {t, genes - 1}], 0.001];
arraylets14 = Chop[TrigFit[arraylets[[14]], 1, {t, genes - 1}], 0.001];
arraylets15 = Chop[TrigFit[arraylets[[15]], 1, {t, genes - 1}], 0.001];
arraylets16 = Chop[TrigFit[arraylets[[16]], 1, {t, genes - 1}], 0.001];
arraylets17 = Chop[TrigFit[arraylets[[17]], 1, {t, genes - 1}], 0.001];
```

```

p = Table[0, {5}];
color =
  {RGBColor[1, 0, 0], RGBColor[0, 0, 1], RGBColor[0, 0.5, 0], RGBColor[1, 0.5, 0], RGBColor[0.75, 0, 1]};
framex = {{0, "0", "0.035", "0.070", "0.105", "0.140"}, {"0.035", "0.070", "0.105", "0.140"}, {"0.070", "0.105", "0.140"}, {"0.105", "0.140"}, {"0.140"};
labelx = "(c) Expression Level";
labely = ColumnForm[{"", "", "", "", "", "", "", "", "", ""}, Center];
flag = 0;
FittedArraylets = {arraylets13, arraylets14, arraylets15, arraylets16, arraylets17};
offset = {0, 0.025, 0.05, 0.075, 0.1};

Do[{
  graph = ParametricPlot[{FittedArraylets[[n]] + offset[[n]] * 1.4, -t},
    {t, 0, genes - 1},
    PlotStyle -> {RGBColor[0, 0, 0], Thickness[0.016]},
    DisplayFunction -> Identity},
  coordinates = Table[
    If[arraylets[[12 + n, a]] + offset[[n]] * 1.4 > 0.125 * 1.4, 0.125 * 1.4,
      If[arraylets[[12 + n, a]] + offset[[n]] * 1.4 < -0.025 * 1.4, -0.025 * 1.4,
        arraylets[[12 + n, a]] + offset[[n]] * 1.4]],
    {a, 1, genes}],
  coordinates = Table[{coordinates[[a]], -a + 1}, {a, 1, genes}],
  line = Line[coordinates],
  g = Show[{
    Graphics[{color[[n]], line}],
    graph},
  If[flag == 0,
    {FrameLabel -> {None, labely, labelx, None},
      FrameTicks -> {None, framex, framex, None}},
    {FrameLabel -> {None, None, None, None},
      FrameTicks -> {None, None, None, None}}],
  Frame -> True,
  GridLines -> {{offset[[n]] * 1.4, RGBColor[0, 0, 0]}, None},
  AspectRatio -> GoldenRatio * 1.15,
  PlotRange -> {{-0.025 * 1.4, 0.125 * 1.4}, {365, -genes + 1 - 380}},
  DisplayFunction -> Identity],
  g = FullGraphics[g],
  g[[1, 2]] = g[[1, 2]] /.
  Text[labely, {b_, c_}, {1., 0.}] ->
  Text[labely, {b, c}, {0, 0}, {0, 1}],
  g[[1, 2]] = g[[1, 2]] /.
  Text[a_, {b_, c_}, {1., 0.}] ->
  Text[a, {b - 0.01, c}, {0, 0}, {0, 1}],
  g[[1, 2]] = g[[1, 2]] /.
  Text[labelx, {b_, c_}, {0., -1.}] ->
  Text[labelx, {b, c + 1090}, {0, -1}, {1, 0}],
  g[[1, 2]] = g[[1, 2]] /.
  Text[a_, {b_, c_}, {0., -1.}] ->
  Text[a, {b, c}, {0, -1}, {0, 1}],
  flag = flag + 1,
  p[[n]] = Show[g,
    AspectRatio -> GoldenRatio * 2.15,
    PlotRange -> All,
    DisplayFunction -> Identity]],
  {n, 1, 5}]

(* Display Selected Sorted Human Arraylets *)

g9 = Show[{p[[5]], p[[4]], p[[3]], p[[2]], p[[1]]}, DisplayFunction -> Identity];

(* Display Reconstructed Sorted Human Data, Arraylets and Selected Arraylets *)

Show[GraphicsArray[{g7, g8, g9}], GraphicsSpacing -> -0.2];

```



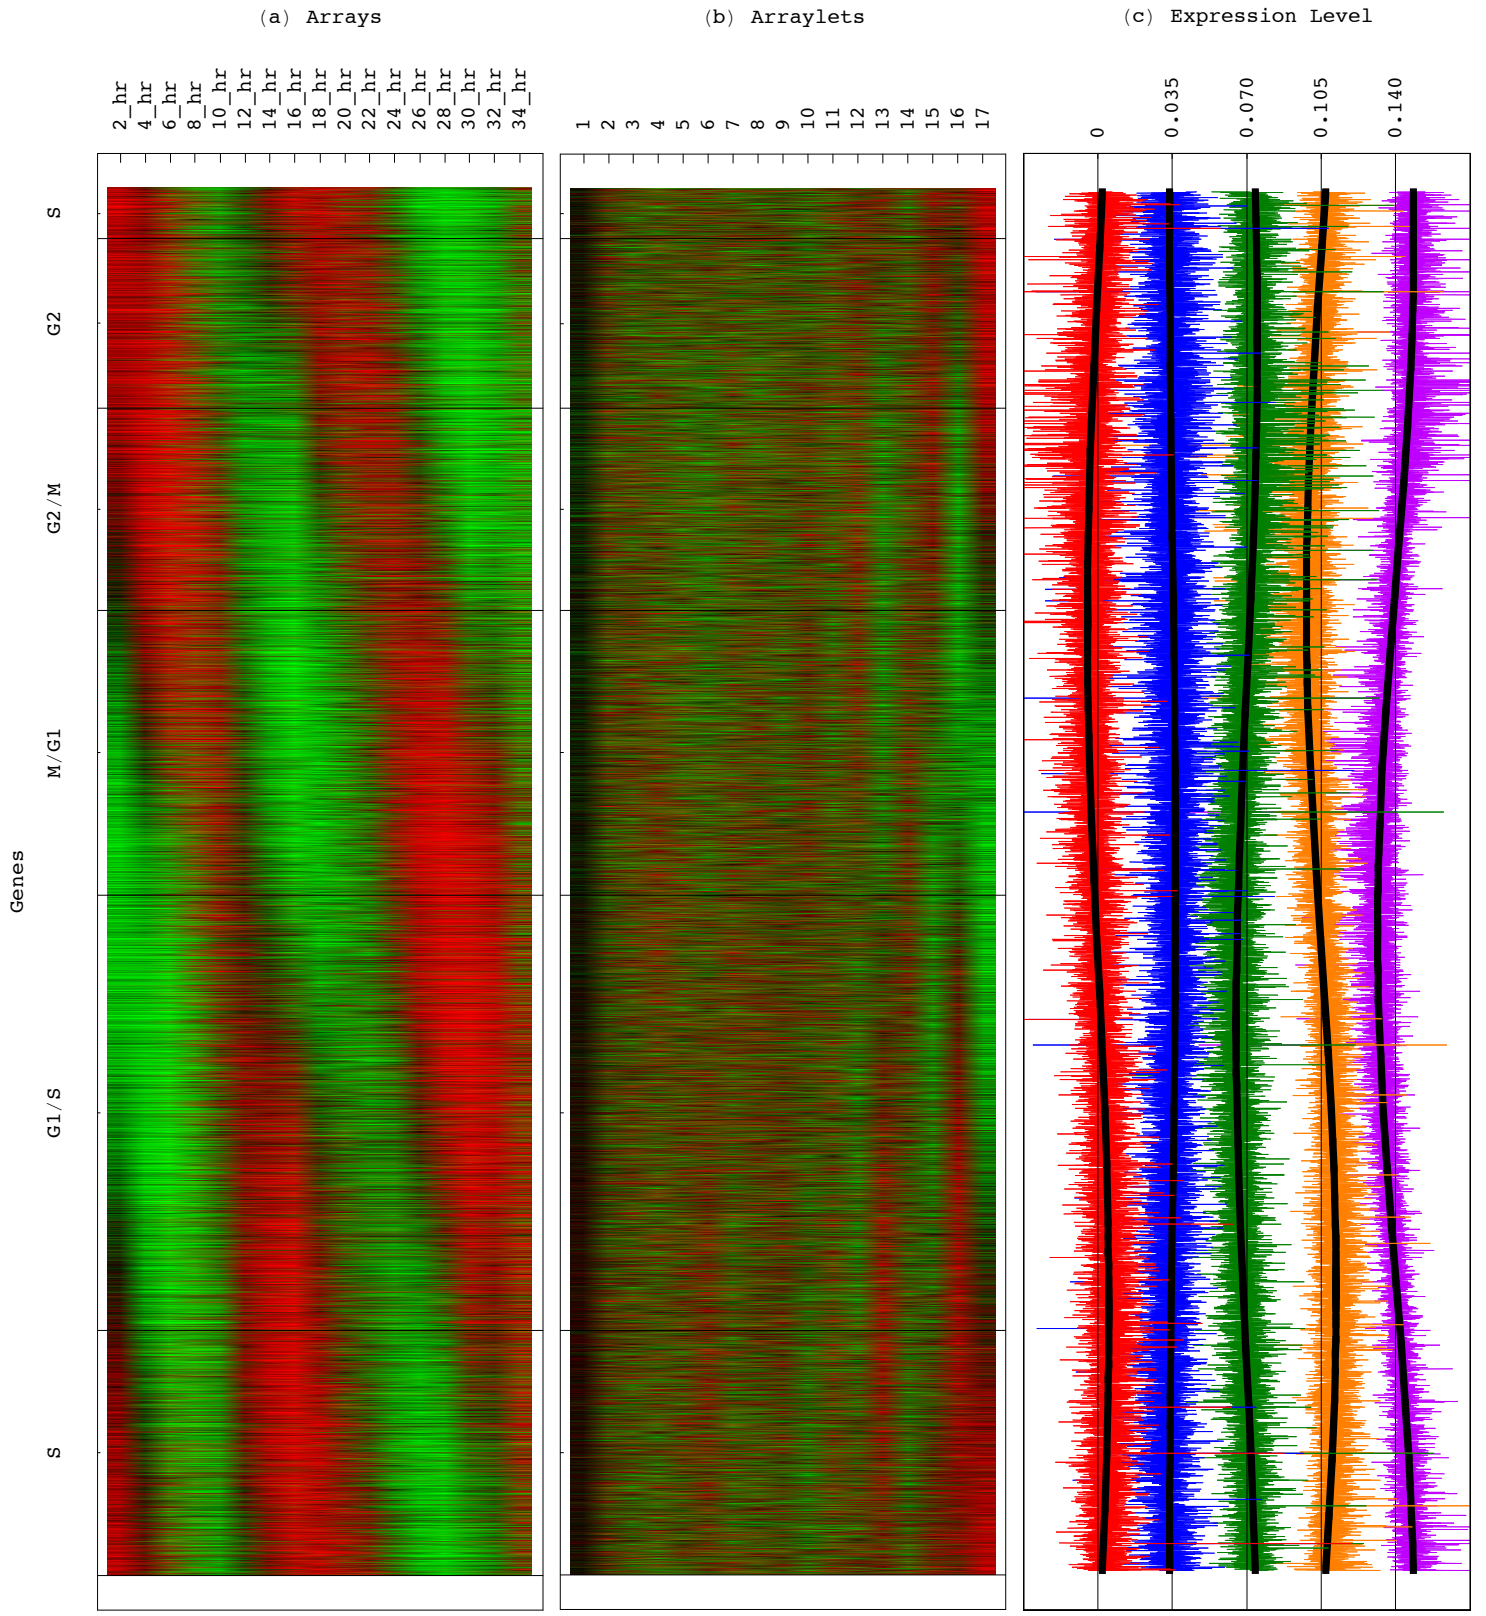

```
(* Display HO GSVD of Sorted S. pombe, S. cerevisiae and Human Data *)
```

```
(* Recalculate HO GSVD of Sorted Original S. pombe, S. cerevisiae and Human Data *)
```

```
cor1 = Dot[Transpose[matrix1], matrix1];
cor2 = Dot[Transpose[matrix2], matrix2];
cor3 = Dot[Transpose[matrix3], matrix3];
cor = Dot[cor1, Inverse[cor2]] + Dot[cor2, Inverse[cor1]] + Dot[cor2, Inverse[cor3]] +
      Dot[cor3, Inverse[cor2]] + Dot[cor1, Inverse[cor3]] + Dot[cor3, Inverse[cor1]];
{values, vectors} = Eigensystem[cor];
genelets = vectors;
Do[genelets[[a]] = genelets[[a]] / Sqrt[Dot[genelets[[a]], genelets[[a]]], {a, 1, arrays}]
arraylets1 = Dot[matrix1, Inverse[genelets]];
arraylets2 = Dot[matrix2, Inverse[genelets]];
arraylets3 = Dot[matrix3, Inverse[genelets]];
Projection1 = arraylets1;
Projection2 = arraylets2;
Projection3 = arraylets3;
arraylets1 = Transpose[arraylets1];
Do[arraylets1[[a]] = arraylets1[[a]] / Sqrt[Dot[arraylets1[[a]], arraylets1[[a]]], {a, 1, arrays}];
arraylets1 = Transpose[arraylets1];
arraylets2 = Transpose[arraylets2];
Do[arraylets2[[a]] = arraylets2[[a]] / Sqrt[Dot[arraylets2[[a]], arraylets2[[a]]], {a, 1, arrays}];
arraylets2 = Transpose[arraylets2];
arraylets3 = Transpose[arraylets3];
Do[arraylets3[[a]] = arraylets3[[a]] / Sqrt[Dot[arraylets3[[a]], arraylets3[[a]]], {a, 1, arrays}];
arraylets3 = Transpose[arraylets3];
d1 = Dot[PseudoInverse[arraylets1], matrix1, Inverse[genelets]];
d2 = Dot[PseudoInverse[arraylets2], matrix2, Inverse[genelets]];
d3 = Dot[PseudoInverse[arraylets3], matrix3, Inverse[genelets]];
```

```
(* Display Sorted S. pombe Data *)
```

```
genes = genes1;
genenames = genenames1;
arraynames = arraynames1;
matrix = matrix1;
```

```
(* Center Sorted S. pombe Data *)
```

```
average = Table[1, {a, 1, arrays}];
average = N[average / Sqrt[Dot[average, average]]];
matrix = matrix - N[Outer[Times, Dot[matrix, average], average]];
matrix = Transpose[matrix];
average = Table[1, {a, 1, genes}];
average = N[average / Sqrt[Dot[average, average]]];
matrix = matrix - N[Outer[Times, Dot[matrix, average], average]];
matrix = Transpose[matrix];
```

```
(* Create Sorted S. pombe Data 2D Red & Green Raster Display *)
```

```
contrast = 10 * 1.5;
displaying = Table[
  If[contrast * matrix[[i, j]] > 0,
    If[contrast * matrix[[i, j]] < 1, {contrast * matrix[[i, j]], 0}, {1, 0}],
    If[contrast * matrix[[i, j]] > -1, {0, -contrast * matrix[[i, j]]}, {0, 1}]],
  {i, 1, genes}, {j, 1, arrays}];
T1 = Table[
  RGBColor[displaying[[i, j, 1]], displaying[[i, j, 2]], 0],
  {i, genes, 1, -1}, {j, 1, arrays}];
```

```
(* Center Sorted S. pombe Arraylets *)
```

```
arraylets = Transpose[arraylets1];  
average = Table[1, {a, 1, genes}];  
average = N[average / Sqrt[Dot[average, average]]];  
arraylets = arraylets - N[Outer[Times, Dot[arraylets, average], average]];  
arraylets = Transpose[arraylets];
```

```
(* Create Sorted S. pombe Arraylets 2 D Red & Green Raster Display *)
```

```
contrast = 75 * 1.5;  
displaying = Table[  
  If[contrast * arraylets[[i, j]] > 0,  
    If[contrast * arraylets[[i, j]] < 1, {contrast * arraylets[[i, j]], 0}, {1, 0}],  
    If[contrast * arraylets[[i, j]] > -1, {0, -contrast * arraylets[[i, j]]}, {0, 1}]],  
  {i, 1, genes}, {j, 1, arrays}];  
U1 = Table[  
  RGBColor[displaying[[i, j, 1]], displaying[[i, j, 2]], 0],  
  {i, genes, 1, -1}, {j, 1, arrays}];
```

```
(* Create S. pombe Expression Fractions Red & Green Raster Display *)
```

```
contrast = 0.03;  
displaying = Table[  
  If[contrast * d1[[i, j]] > 0,  
    If[contrast * d1[[i, j]] < 1, {contrast * d1[[i, j]], 0}, {1, 0}],  
    If[contrast * d1[[i, j]] > -1, {0, -contrast * d1[[i, j]]}, {0, 1}]],  
  {i, 1, arrays}, {j, 1, arrays}];  
ue1 = Table[  
  RGBColor[displaying[[i, j, 1]], displaying[[i, j, 2]], 0],  
  {i, arrays, 1, -1}, {j, 1, arrays}];
```

```
(* Center Genelets *)
```

```
average = Table[1, {a, 1, arrays}];  
average = N[average / Sqrt[Dot[average, average]]];  
centergenelets = genelets - N[Outer[Times, Dot[genelets, average], average]];
```

```
(* Create Genelets 2 D Red & Green Raster Display *)
```

```
contrast = 3;  
displaying = Table[  
  If[contrast * centergenelets[[i, j]] > 0,  
    If[contrast * centergenelets[[i, j]] < 1, {contrast * centergenelets[[i, j]], 0}, {1, 0}],  
    If[contrast * centergenelets[[i, j]] > -1, {0, -contrast * centergenelets[[i, j]]}, {0, 1}]],  
  {i, 1, arrays}, {j, 1, arrays}];  
G = Table[  
  RGBColor[displaying[[i, j, 1]], displaying[[i, j, 2]], 0],  
  {i, arrays, 1, -1}, {j, 1, arrays}];
```

```
(* Display Sorted S. cerevisiae Data *)
```

```
genes = genes2;  
genenames = genenames2;  
arraynames = arraynames2;  
matrix = matrix2;
```

```
(* Center Sorted S. cerevisiae Data *)
```

```
average = Table[1, {a, 1, arrays}];  
average = N[average / Sqrt[Dot[average, average]]];  
matrix = matrix - N[Outer[Times, Dot[matrix, average], average]];  
matrix = Transpose[matrix];  
average = Table[1, {a, 1, genes}];  
average = N[average / Sqrt[Dot[average, average]]];  
matrix = matrix - N[Outer[Times, Dot[matrix, average], average]];  
matrix = Transpose[matrix];
```

```
(* Create Sorted S. cerevisiae Data 2 D Red & Green Raster Display *)
```

```
contrast = 15 * 1.5;  
displaying = Table[  
  If[contrast * matrix[[i, j]] > 0,  
    If[contrast * matrix[[i, j]] < 1, {contrast * matrix[[i, j]], 0}, {1, 0}],  
    If[contrast * matrix[[i, j]] > -1, {0, -contrast * matrix[[i, j]]}, {0, 1}]],  
  {i, 1, genes}, {j, 1, arrays}];  
T2 = Table[  
  RGBColor[displaying[[i, j, 1]], displaying[[i, j, 2]], 0],  
  {i, genes, 1, -1}, {j, 1, arrays}];
```

```
(* Center Sorted S. cerevisiae Arraylets *)
```

```
arraylets = Transpose[arraylets2];  
average = Table[1, {a, 1, genes}];  
average = N[average / Sqrt[Dot[average, average]]];  
arraylets = arraylets - N[Outer[Times, Dot[arraylets, average], average]];  
arraylets = Transpose[arraylets];
```

```
(* Create Sorted S. cerevisiae Arraylets 2 D Red & Green Raster Display *)
```

```
contrast = 125 * 1.5;  
displaying = Table[  
  If[contrast * arraylets[[i, j]] > 0,  
    If[contrast * arraylets[[i, j]] < 1, {contrast * arraylets[[i, j]], 0}, {1, 0}],  
    If[contrast * arraylets[[i, j]] > -1, {0, -contrast * arraylets[[i, j]]}, {0, 1}]],  
  {i, 1, genes}, {j, 1, arrays}];  
U2 = Table[  
  RGBColor[displaying[[i, j, 1]], displaying[[i, j, 2]], 0],  
  {i, genes, 1, -1}, {j, 1, arrays}];
```

```
(* Create S. cerevisiae Expression Fractions Red & Green Raster Display *)
```

```
contrast = 0.03;  
displaying = Table[  
  If[contrast * d2[[i, j]] > 0,  
    If[contrast * d2[[i, j]] < 1, {contrast * d2[[i, j]], 0}, {1, 0}],  
    If[contrast * d2[[i, j]] > -1, {0, -contrast * d2[[i, j]]}, {0, 1}]],  
  {i, 1, arrays}, {j, 1, arrays}];  
ue2 = Table[  
  RGBColor[displaying[[i, j, 1]], displaying[[i, j, 2]], 0],  
  {i, arrays, 1, -1}, {j, 1, arrays}];
```

```
(* Display Sorted Human Data *)
```

```
genes = genes3;  
genenames = genenames3;  
arraynames = arraynames3;  
matrix = matrix3;
```

```
(* Center Sorted Human Data *)
```

```
average = Table[1, {a, 1, arrays}];  
average = N[average / Sqrt[Dot[average, average]]];  
matrix = matrix - N[Outer[Times, Dot[matrix, average], average]];  
matrix = Transpose[matrix];  
average = Table[1, {a, 1, genes}];  
average = N[average / Sqrt[Dot[average, average]]];  
matrix = matrix - N[Outer[Times, Dot[matrix, average], average]];  
matrix = Transpose[matrix];
```

```
(* Create Sorted Human Data 2 D Red & Green Raster Display *)
```

```
contrast = 15 * 1.5;  
displaying = Table[  
  If[contrast * matrix[[i, j]] > 0,  
    If[contrast * matrix[[i, j]] < 1, {contrast * matrix[[i, j]], 0}, {1, 0}],  
    If[contrast * matrix[[i, j]] > -1, {0, -contrast * matrix[[i, j]]}, {0, 1}]],  
  {i, 1, genes}, {j, 1, arrays}];  
T3 = Table[  
  RGBColor[displaying[[i, j, 1]], displaying[[i, j, 2]], 0],  
  {i, genes, 1, -1}, {j, 1, arrays}];
```

```
(* Center Sorted Human Arraylets *)
```

```
arraylets = Transpose[arraylets3];  
average = Table[1, {a, 1, genes}];  
average = N[average / Sqrt[Dot[average, average]]];  
arraylets = arraylets - N[Outer[Times, Dot[arraylets, average], average]];  
arraylets = Transpose[arraylets];
```

```
(* Create Sorted Human Arraylets 2 D Red & Green Raster Display *)
```

```
contrast = 125 * 1.5;  
displaying = Table[  
  If[contrast * arraylets[[i, j]] > 0,  
    If[contrast * arraylets[[i, j]] < 1, {contrast * arraylets[[i, j]], 0}, {1, 0}],  
    If[contrast * arraylets[[i, j]] > -1, {0, -contrast * arraylets[[i, j]]}, {0, 1}]],  
  {i, 1, genes}, {j, 1, arrays}];  
U3 = Table[  
  RGBColor[displaying[[i, j, 1]], displaying[[i, j, 2]], 0],  
  {i, genes, 1, -1}, {j, 1, arrays}];
```

```
(* Create Human Expression Fractions Red & Green Raster Display *)
```

```
contrast = 0.03;  
displaying = Table[  
  If[contrast * d3[[i, j]] > 0,  
    If[contrast * d3[[i, j]] < 1, {contrast * d3[[i, j]], 0}, {1, 0}],  
    If[contrast * d3[[i, j]] > -1, {0, -contrast * d3[[i, j]]}, {0, 1}]],  
  {i, 1, arrays}, {j, 1, arrays}];  
ue3 = Table[  
  RGBColor[displaying[[i, j, 1]], displaying[[i, j, 2]], 0],  
  {i, arrays, 1, -1}, {j, 1, arrays}];
```

```
(* Display HO GSVD for N=3 Organisms *)
```

```
(* Create Data Tensor Display *)
```

```
gtensor = {  
  Graphics[RasterArray[T1, {{0, -25}, {13, 25}}]],  
  Graphics[RasterArray[T2, {{13, -42}, {26, 38}}]],  
  Graphics[RasterArray[T3, {{26, -77}, {39, 51}}]],  
  Graphics[Line[{{0, 25}, {0, -25}, {13, -25}, {13, 25}}]],  
  Graphics[Line[{{13, 38}, {13, -42}, {26, -42}, {26, 38}}]],  
  Graphics[Line[{{26, 51}, {26, -77}, {39, -77}, {39, 51}}]],  
  Graphics[{RGBColor[1, 1, 1], Line[{{13, -25}, {13, 25}}]}],  
  Graphics[{RGBColor[1, 1, 1], Line[{{26, -42}, {26, 38}}]}],  
  Graphics[Line[{{0, 25}, {26, 51}, {39, 51}, {13, 25}, {0, 25}}]],  
  Table[Graphics[Line[{{a, 25 + a}, {a - 4, 25 + a + 2}}]], {a, 0, 26, 13}],  
  Graphics[Text[StyleForm["D1", FontSize → 12], {-4, 25 + 2}, {1, 0}]],  
  Graphics[Text[StyleForm["D2", FontSize → 12], {13 - 4, 38 + 2}, {1, 0}]],  
  Graphics[Text[StyleForm["D3", FontSize → 12], {26 - 4, 51 + 2}, {1, 0}]],  
  Graphics[Text["Organisms", {2, 42.5}, {0, 0}, {1, 1}]],  
  Graphics[Text["Arrays", {32.5, 55}]],  
  Graphics[Text["Genes", {-4, 18.5}, {0, 0}, {0, 1}]]];
```

```
(* Create Column Basis Vectors Display *)
```

```
space = 58.5;  
gzarraylets = {  
  Graphics[RasterArray[U1, {{space, -25}, {space + 13, 25}}]],  
  Graphics[RasterArray[U2, {{space + 13, -42}, {space + 26, 38}}]],  
  Graphics[RasterArray[U3, {{space + 26, -77}, {space + 39, 51}}]],  
  Graphics[Line[{{space + 26, 51}, {space + 26, -77}, {space + 39, -77},  
    {space + 39, 51}, {space + 26, 51}}]],  
  Graphics[Line[{{space + 13, 38}, {space + 13, -42}, {space + 26, -42},  
    {space + 26, 38}, {space + 13, 38}}]],  
  Graphics[Line[{{space, 25}, {space, -25}, {space + 13, -25},  
    {space + 13, 25}, {space, 25}}]],  
  Graphics[{RGBColor[1, 1, 1], Line[{{space + 13, -25}, {space + 13, 25}}]}],  
  Graphics[{RGBColor[1, 1, 1], Line[{{space + 26, -42}, {space + 26, 38}}]}],  
  Graphics[Line[{{space, 25}, {space + 26, 51}, {space + 39, 51}, {space + 13, 25}, {space, 25}}]],  
  Table[Graphics[Line[{{space + a, 25 + a}, {space + a - 4, 25 + a + 2}}]], {a, 0, 26, 13}],  
  Graphics[Text[StyleForm["U1", FontSize → 12], {space - 4, 25 + 2}, {1, 0}]],  
  Graphics[Text[StyleForm["U2", FontSize → 12], {space + 13 - 4, 38 + 2}, {1, 0}]],  
  Graphics[Text[StyleForm["U3", FontSize → 12], {space + 26 - 4, 51 + 2}, {1, 0}]],  
  Graphics[Text["Organisms", {space + 2, 42.5}, {0, 0}, {1, 1}]],  
  Graphics[Text["Arraylets", {space + 32.5, 55}]],  
  Graphics[Text["Genes", {space - 4, 18.5}, {0, 0}, {0, 1}]]];
```

(\* Create Diagonal Matrices Display \*)

```
space = 113.75;
gcore = {
  Graphics[RasterArray[ue1, {{space, 12}, {space + 13, 25}}]],
  Graphics[RasterArray[ue2, {{space + 13, 25}, {space + 26, 38}}]],
  Graphics[RasterArray[ue3, {{space + 26, 38}, {space + 39, 51}}]],
  Graphics[Line[
    {{space, 25}, {space, 12}, {space + 13, 12}, {space + 13, 25}, {space, 25}}]],
  Graphics[Line[
    {{space + 13, 38}, {space + 13, 25}, {space + 26, 25}, {space + 26, 38}, {space + 13, 38}}]],
  Graphics[Line[
    {{space + 26, 51}, {space + 26, 38}, {space + 39, 38}, {space + 39, 51}, {space + 26, 51}}]],
  Graphics[Line[{{space, 25}, {space + 26, 51}}]],
  Graphics[Line[{{space + 13, 12}, {space + 39, 38}}]],
  Table[Graphics[Line[{{space + a, 25 + a}, {space + a - 4, 25 + a + 2}}]], {a, 0, 26, 13}],
  Graphics[Text[StyleForm[" $\Sigma_1$ ", FontSize -> 12], {space - 4, 25 + 2}, {1, 0}]],
  Graphics[Text[StyleForm[" $\Sigma_2$ ", FontSize -> 12], {space + 13 - 4, 38 + 2}, {1, 0}]],
  Graphics[Text[StyleForm[" $\Sigma_3$ ", FontSize -> 12], {space + 26 - 4, 51 + 2}, {1, 0}]],
  Graphics[Text["Organisms", {space + 2, 42.5}, {0, 0}, {1, 1}],
  Graphics[Text["Genelets", {space + 32.5, 55}],
  Graphics[Text["Arraylets", {space - 4, 18.5}, {0, 0}, {0, 1}]]];
```

(\* Create Row Basis Vectors Display \*)

```
space = 156;
gxgenelets = {
  Graphics[RasterArray[G, {{space + 13, 38}, {space + 26, 51}}]],
  Graphics[Line[{{space + 13, 51}, {space + 13, 38}, {space + 26, 38}, {space + 26, 51},
    {space + 13, 51}}]],
  Graphics[Line[{{space + 13, 51}, {space + 13 - 4, 51 + 2}}]],
  Graphics[Text[StyleForm[" $V^x$ ", FontSize -> 12], {space + 13 - 4, 51 + 2}, {1, 0}]],
  Graphics[Text["Arrays", {space + 19.5, 55}],
  Graphics[Text["Genelets", {space + 13 - 4, 44.5}, {0, 0}, {0, 1}]]];
```



(\* Display HO GSVD for N=3 Organisms \*)

```
equal = Graphics[Text[StyleForm["=", FontSize -> 30], {45.5, 18.5}]];
g = Show[{gtensor, equal, gzarraylets, gcore, gxgenelets},
  PlotRange -> All,
  AspectRatio -> Automatic];
```

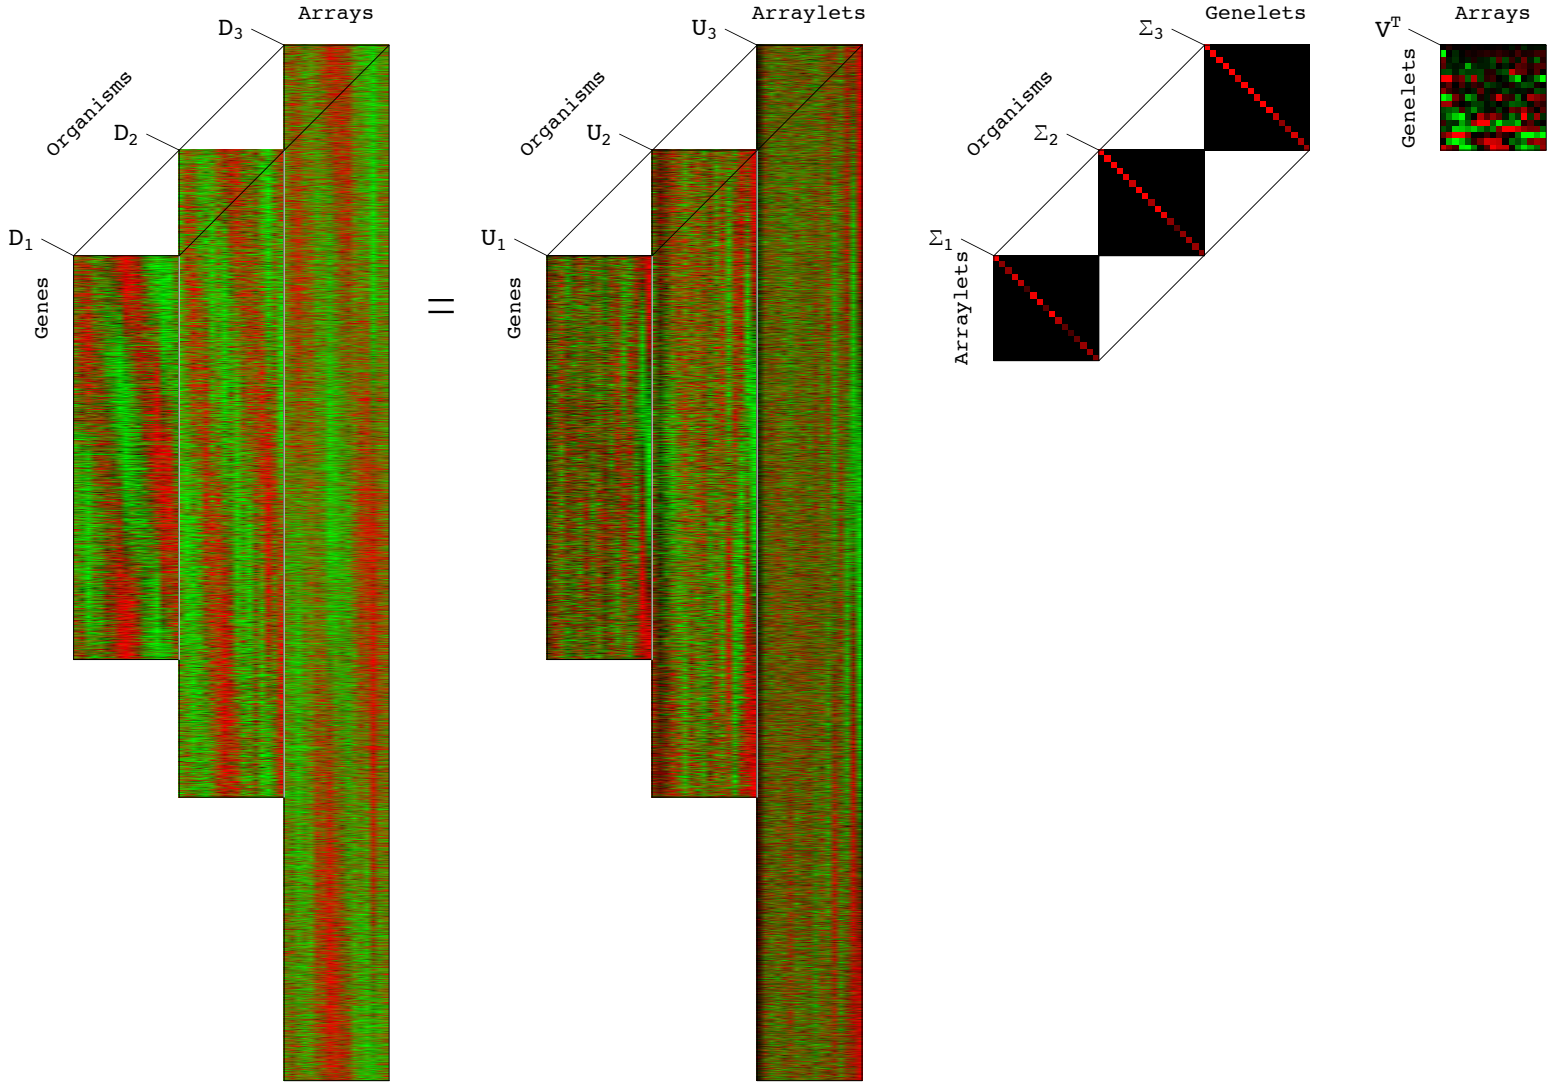

Supplement: pone.0028072.s003.pdf [file pone.0028072.s003.pdf]
